# Supplementary material for: Biswulfenioidins A–E, dioxygen-bridged abietane-type diterpenoid dimers with anti-Zika virus potential from Orthosiphon wulfenioides
Source: Royal Society of Chemistry journal article supplement (doi:10.1039/d4qo00619d), 2024-01-01
Supplement: d4qo00619d1.pdf [file d4qo00619d1.pdf]

## **Supplementary Information**

### **Biswulfenoidins A–E, dioxygen-bridged abietane-type diterpenoid dimers with anti-zika virus potential from *Orthosiphon wulfenioides***

Wen-Chao Tu,<sup>‡</sup> <sup>a,c</sup> Yong-Xiang Huang,<sup>‡</sup> <sup>b</sup> Yuan-Lin Kong,<sup>a</sup> Bo Li,<sup>a</sup> Bin-Bao Wang,<sup>b</sup> Tian-Hao Dong,<sup>c</sup> Wei-Chi Chen,<sup>c</sup> Muhammad Aurang Zeb,<sup>a</sup> Xiao-Li Li,<sup>\*a</sup> Mei-Feng Liu,<sup>\*c</sup> Chang-Bo Zheng,<sup>\*b</sup> Wei-Lie Xiao<sup>\*a,d</sup>

<sup>a</sup> Key Laboratory of Medicinal Chemistry for Natural Resource, Ministry of Education; Yunnan Characteristic Plant Extraction Laboratory; Yunnan Key Laboratory of Research and Development for Natural Products; School of Pharmacy and School of Chemical Science and Technology; State Key Laboratory for Conservation and Utilization of Bio-Resources in Yunnan, Yunnan University, Kunming 650091, People's Republic of China

<sup>b</sup> School of Pharmaceutical Science and Yunnan Key Laboratory of Pharmacology for Natural Products, Yunnan Vaccine Laboratory, College of Modern biomedical industry, School of Basic Medical, Kunming Medical University, Kunming, 650500, People's Republic of China

<sup>c</sup> Key Laboratory of Functional Molecular Engineering of Guangdong Province, School of Chemistry and Chemical Engineering, South China University of Technology, Guangzhou, 510640, People's Republic of China

<sup>d</sup> Southwest United Graduate School, Kunming, 650592, People's Republic of China

<sup>‡</sup> These authors contributed equally.

#### **Corresponding Author**

Xiao-Li Li\* (E-mail: lixiaoli@ynu.edu.cn)

Mei-Feng Liu\* (E-mail: liumf@scut.edu.cn)

Chang-Bo Zheng\* (E-mail: zhengchangbo@kmmu.edu.cn)

Wei-Lie Xiao\* (E-mail: xiaoweilie@ynu.edu.cn)

## Contents

|                                                                                                                                          |    |
|------------------------------------------------------------------------------------------------------------------------------------------|----|
| <b>Table S1.</b> $^1\text{H}$ and $^{13}\text{C}$ NMR data of compound <b>6–8</b> in $\text{CDCl}_3$ ( $J$ in Hz, $\delta$ in ppm) ..... | 4  |
| <b>Figure S1.</b> Key HMBC and COSY correlations of compounds <b>2, 3, and 6</b> .....                                                   | 5  |
| <b>Figure S2.</b> Key ROESY correlations of compounds <b>2, 3, and 6</b> .....                                                           | 5  |
| <b>Figure S3–S8.</b> NMR spectrum of biswulfenioidin A ( <b>1</b> ) in chloroform .....                                                  | 6  |
| <b>Figure S9.</b> HRESIMS spectrum of biswulfenioidin A ( <b>1</b> ) .....                                                               | 12 |
| <b>Figure S10.</b> IR spectrum of biswulfenioidin A ( <b>1</b> ) .....                                                                   | 13 |
| <b>Figure S11.</b> UV spectrum of biswulfenioidin A ( <b>1</b> ) .....                                                                   | 14 |
| <b>Figure S12.</b> CD spectrum of biswulfenioidin A ( <b>1</b> ) .....                                                                   | 15 |
| <b>Figure S13–S18.</b> NMR spectrum of biswulfenioidin B ( <b>2</b> ) in chloroform .....                                                | 16 |
| <b>Figure S19.</b> HRESIMS spectrum of biswulfenioidin B ( <b>2</b> ) .....                                                              | 22 |
| <b>Figure S20.</b> IR spectrum of biswulfenioidin B ( <b>2</b> ) .....                                                                   | 23 |
| <b>Figure S21.</b> UV spectrum of biswulfenioidin B ( <b>2</b> ) .....                                                                   | 24 |
| <b>Figure S22.</b> CD spectrum of biswulfenioidin B ( <b>2</b> ) .....                                                                   | 25 |
| <b>Figure S23–S28.</b> NMR spectrum of biswulfenioidin C ( <b>3</b> ) in chloroform .....                                                | 26 |
| <b>Figure S29.</b> HRESIMS spectrum of biswulfenioidin C ( <b>3</b> ) .....                                                              | 32 |
| <b>Figure S30.</b> IR spectrum of biswulfenioidin C ( <b>3</b> ) .....                                                                   | 33 |
| <b>Figure S31.</b> UV spectrum of biswulfenioidin C ( <b>3</b> ) .....                                                                   | 34 |
| <b>Figure S32.</b> CD spectrum of biswulfenioidin C ( <b>3</b> ) .....                                                                   | 35 |
| <b>Figure S33–S38.</b> NMR spectrum of biswulfenioidin D ( <b>4</b> ) in chloroform .....                                                | 36 |
| <b>Figure S39.</b> HRESIMS spectrum of biswulfenioidin D ( <b>4</b> ) .....                                                              | 42 |
| <b>Figure S40.</b> IR spectrum of biswulfenioidin D ( <b>4</b> ) .....                                                                   | 43 |
| <b>Figure S41.</b> UV spectrum of biswulfenioidin D ( <b>4</b> ) .....                                                                   | 44 |
| <b>Figure S42.</b> CD spectrum of biswulfenioidin D ( <b>4</b> ) .....                                                                   | 45 |
| <b>Figure S43–S48.</b> NMR spectrum of biswulfenioidin E ( <b>5</b> ) in chloroform .....                                                | 46 |
| <b>Figure S49.</b> HRESIMS spectrum of biswulfenioidin E ( <b>5</b> ) .....                                                              | 52 |
| <b>Figure S50.</b> IR spectrum of biswulfenioidin E ( <b>5</b> ) .....                                                                   | 53 |
| <b>Figure S51.</b> UV spectrum of biswulfenioidin E ( <b>5</b> ) .....                                                                   | 54 |
| <b>Figure S52.</b> CD spectrum of biswulfenioidin E ( <b>5</b> ) .....                                                                   | 55 |
| <b>Figure S53–S58.</b> NMR spectrum of taxodascens J ( <b>6</b> ) in chloroform .....                                                    | 56 |
| <b>Figure S59.</b> HRESIMS spectrum of taxodascens J ( <b>6</b> ) .....                                                                  | 62 |

|                                                                                                                                                                                  |    |
|----------------------------------------------------------------------------------------------------------------------------------------------------------------------------------|----|
| <b>Figure S60.</b> IR spectrum of taxodascens J ( <b>6</b> ) .....                                                                                                               | 63 |
| <b>Figure S61.</b> UV spectrum of taxodascens J ( <b>6</b> ) .....                                                                                                               | 64 |
| <b>Figure S62.</b> CD spectrum of taxodascens J ( <b>6</b> ) .....                                                                                                               | 65 |
| <b>Figure S63–S64.</b> NMR spectrum of abieta-6,8,13-triene-11,12-dione ( <b>7</b> ) in chloroform.....                                                                          | 66 |
| <b>Figure S65–S66.</b> NMR spectrum of salviphomone ( <b>8</b> ) in chloroform .....                                                                                             | 68 |
| <b>Figure S67.</b> Possible conformers of <b>5</b> for ECD calculation.....                                                                                                      | 70 |
| <b>Table S2.</b> Important thermodynamic parameters and Boltzmann distributions of the optimized isomer <b>5</b> at m062x /6-311 + G (d, p) level in the methanol.....           | 70 |
| <b>Table S3.</b> Optimized Z-matrixes of isomer <b>5</b> in the methanol (Å) at m062x/6-311 G (d, p) level. ....                                                                 | 70 |
| <b>Figure S68.</b> Possible conformers of <b>6</b> for ECD calculation.....                                                                                                      | 75 |
| <b>Table S4.</b> Important thermodynamic parameters and Boltzmann distributions of the optimized isomer <b>6</b> at m062x/6-311 G (d, p) level in the methanol. ....             | 75 |
| <b>Table S5.</b> Optimized Z-matrixes of isomer <b>6</b> in the methanol (Å) at m062x/6-311 G (d, p) level. ....                                                                 | 76 |
| <b>Table S6.</b> Key transitions, oscillator strengths, and rotatory strengths in the ECD spectra of conformers <b>6A</b> at the pbe1pbe/aug-ccpvdz level in MeOH with PCM. .... | 78 |
| <b>Figure S69.</b> The full raw data of western blots (E and F) of compound <b>5</b> .....                                                                                       | 82 |

**Table S1.**  $^1\text{H}$  and  $^{13}\text{C}$  NMR data of compound **6–8** in  $\text{CDCl}_3$  ( $J$  in Hz,  $\delta$  in ppm)

| No. | <b>6</b> <sup>b</sup>            |                     | <b>7</b> <sup>a</sup>                      |                     | <b>8</b> <sup>a</sup>            |                     |
|-----|----------------------------------|---------------------|--------------------------------------------|---------------------|----------------------------------|---------------------|
|     | $\delta_{\text{H}}$ ( $J$ in Hz) | $\delta_{\text{C}}$ | $\delta_{\text{H}}$ ( $J$ in Hz)           | $\delta_{\text{C}}$ | $\delta_{\text{H}}$ ( $J$ in Hz) | $\delta_{\text{C}}$ |
| 1   | 2.86 m<br>1.76 m                 | 37.3                | 2.85 d (13.7)<br>1.66 dd (13.7, 3,4)       | 35.1                | 2.63 m<br>1.05 m                 | 35.7                |
| 2   | 1.71 m<br>1.62                   | 19.1                | 1.55 m<br>1.15 m                           | 18.8                | 1.63 m<br>1.48 m                 | 18.5                |
| 3   | 1.64 m<br>1.35 m                 | 41.4                | 1.48 dd (13.2, 3,3)<br>1.31 dd (13.2, 4,9) | 40.8                | 1.44 m<br>1.24 m                 | 42.7                |
| 4   |                                  | 33.7                |                                            | 33.2                |                                  | 33.3                |
| 5   | 2.26 d (12.5)                    | 43.6                | 2.11 t (3.2)                               | 52.6                | 1.40 d (11.9)                    | 53.1                |
| 6   | 4.46 dd (12.5, 4.5)              | 72.5                | 6.53 dd (9.5, 3,2)                         | 142.0               | 4.02 dd (11.9, 8.1)              | 73.7                |
| 7   | 4.63 d (4.5)                     | 75.7                | 6.22 dd (9.5, 3,2)                         | 126.9               | 4.22 d (8.1)                     | 77.6                |
| 8   |                                  | 126.9               |                                            | 139.5               |                                  | 144.5               |
| 9   |                                  | 132.7               |                                            | 141.5               |                                  | 144.7               |
| 10  |                                  | 41.4                |                                            | 38.5                |                                  | 41.5                |
| 11  |                                  | 142.0               |                                            | 182.1               |                                  | 181.4               |
| 12  |                                  | 140.4               |                                            | 182.0               |                                  | 180.8               |
| 13  |                                  | 131.7               |                                            | 148.0               |                                  | 147.5               |
| 14  | 6.86 br s                        | 119.9               | 6.57 d (1.3)                               | 136.6               | 7.02 br s                        | 134.0               |
| 15  | 3.04 sept (6.7)                  | 27.0                | 2.92 sept (6.8)                            | 27.2                | 2.92 sept (7.0)                  | 27.3                |
| 16  | 1.27 d (6.7)                     | 22.5                | 1.11 d (6.8)                               | 21.6                | 1.11 d (6.9)                     | 21.4                |
| 17  | 1.29 d (6.7)                     | 22.4                | 1.11 d (6.8)                               | 21.7                | 1.12 d (6.9)                     | 21.4                |
| 18  | 1.28 s                           | 34.4                | 0.98 s                                     | 32.8                | 1.20 s                           | 36.2                |
| 19  | 1.40 s                           | 23.5                | 0.99 s                                     | 23.0                | 1.13 s                           | 22.7                |
| 20  | 1.42 s                           | 23.4                | 1.00 s                                     | 15.5                | 1.36 s                           | 21.5                |
| 1'  | 2.90 m<br>1.54 m                 | 36.5                |                                            |                     |                                  |                     |
| 2'  | 1.71 m<br>1.55 m                 | 19.1                |                                            |                     |                                  |                     |
| 3'  | 1.52 m<br>1.26 m                 | 41.3                |                                            |                     |                                  |                     |
| 4'  |                                  | 33.1                |                                            |                     |                                  |                     |
| 5'  | 1.73 d (11.3)                    | 51.6                |                                            |                     |                                  |                     |
| 6'  | 3.94 dd (11.3, 8.7)              | 77.5                |                                            |                     |                                  |                     |
| 7'  | 4.58 d (8.7)                     | 73.7                |                                            |                     |                                  |                     |
| 8'  |                                  | 127.3               |                                            |                     |                                  |                     |
| 9'  |                                  | 131.7               |                                            |                     |                                  |                     |
| 10' |                                  | 42.1                |                                            |                     |                                  |                     |
| 11' |                                  | 140.9               |                                            |                     |                                  |                     |
| 12' |                                  | 140.1               |                                            |                     |                                  |                     |
| 13' |                                  | 132.0               |                                            |                     |                                  |                     |
| 14' | 7.09 br s                        | 114.1               |                                            |                     |                                  |                     |
| 15' | 3.01 sept (6.8)                  | 27.4                |                                            |                     |                                  |                     |
| 16' | 1.26 d (6.8)                     | 22.6                |                                            |                     |                                  |                     |
| 17' | 1.24 d (6.8)                     | 22.6                |                                            |                     |                                  |                     |
| 18' | 1.12 s                           | 35.3                |                                            |                     |                                  |                     |
| 19' | 1.30 s                           | 23.8                |                                            |                     |                                  |                     |
| 20' | 1.52 s                           | 23.2                |                                            |                     |                                  |                     |

<sup>a</sup>Measured at 400 MHz, <sup>b</sup>Measured at 600 MHz.



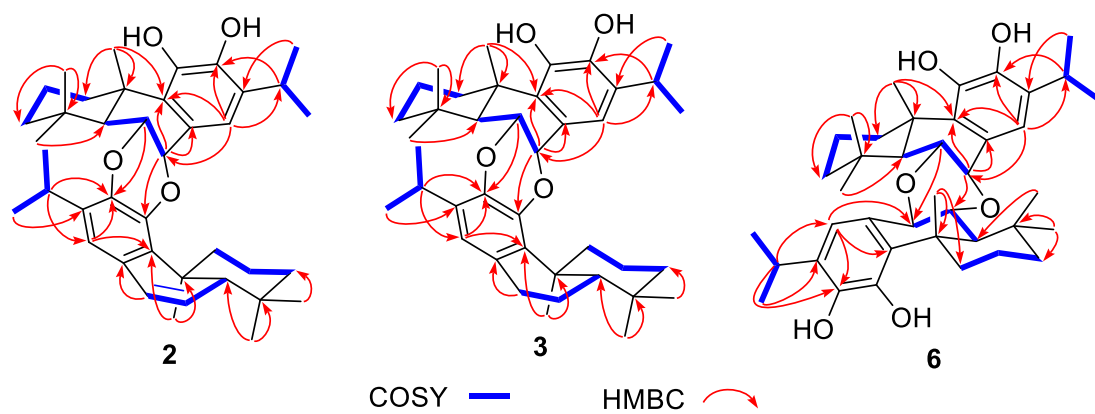

**Figure S1.** Key HMBC and COSY correlations of compounds 2, 3, and 6

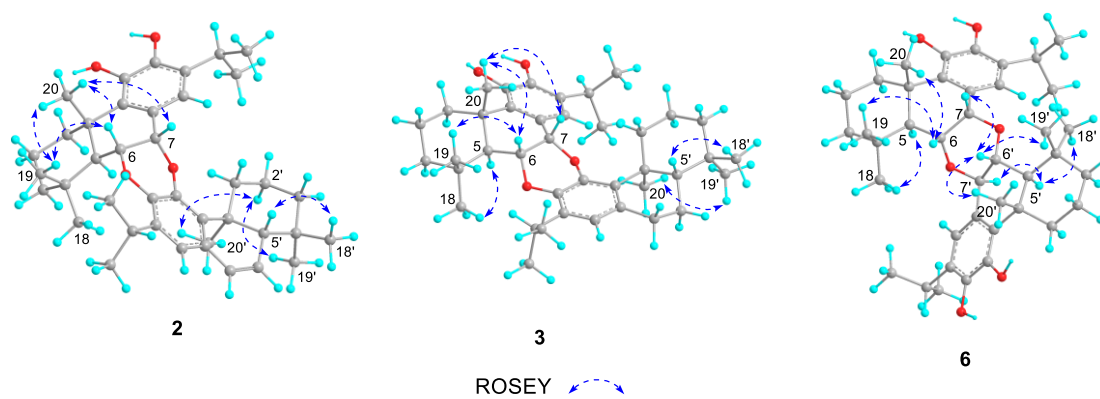

**Figure S2.** Key ROESY correlations of compounds 2, 3, and 6.

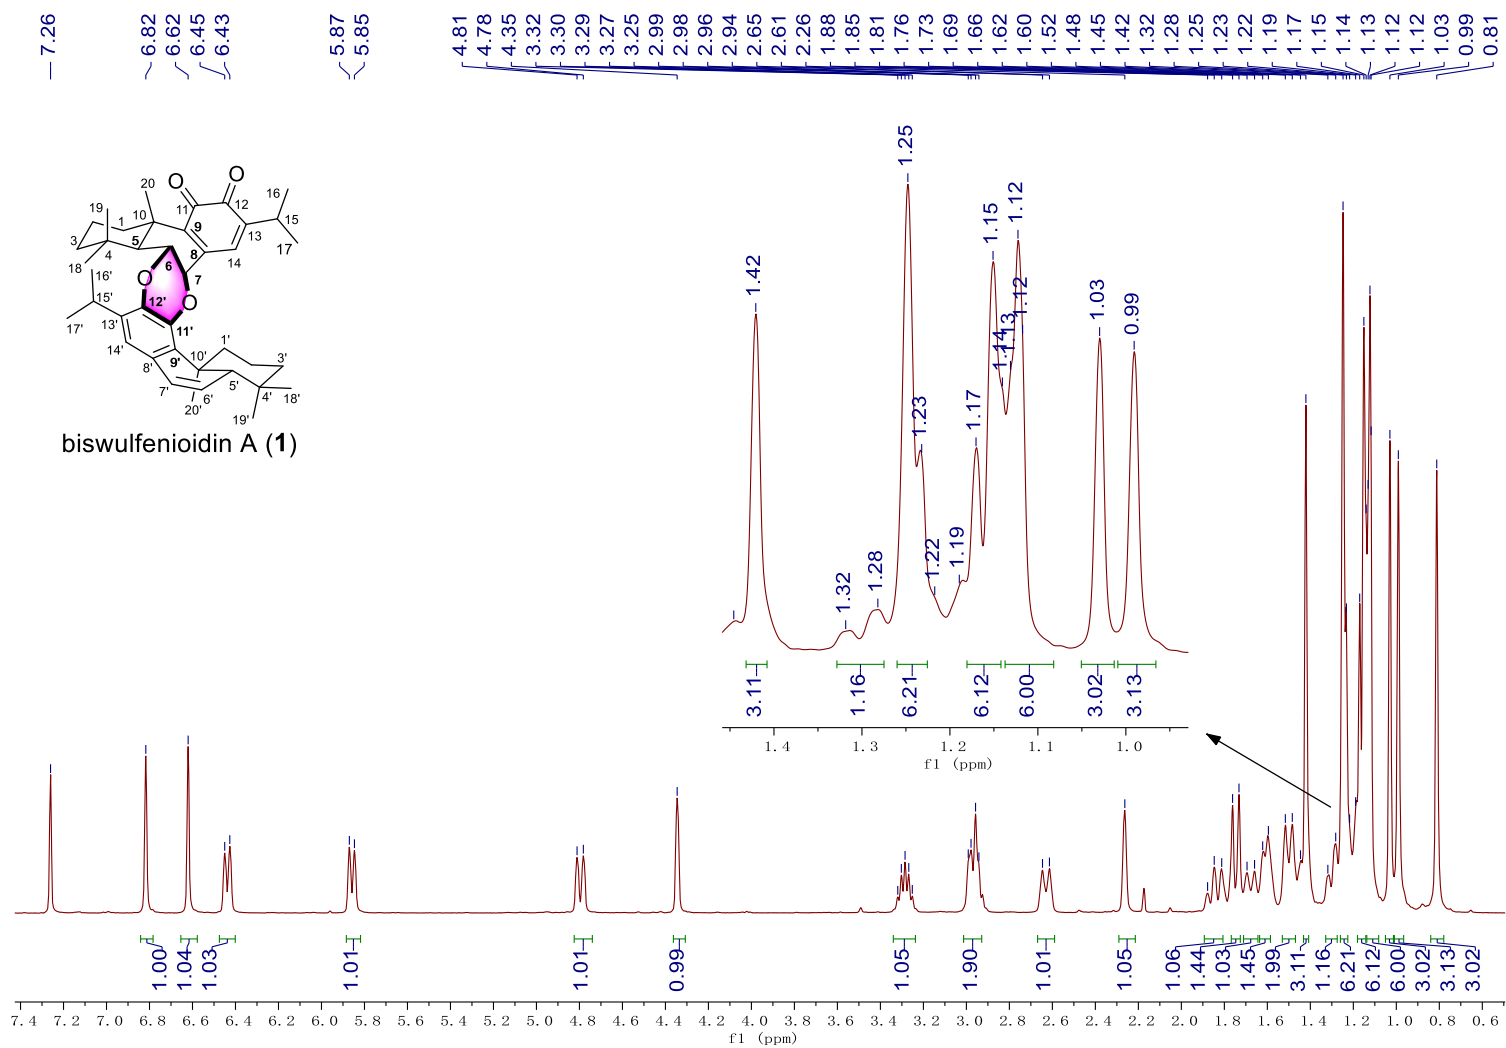

**Figure S3.**  $^1\text{H}$  NMR spectrum of biswulfenioidin A (1) in chloroform (400 MHz)

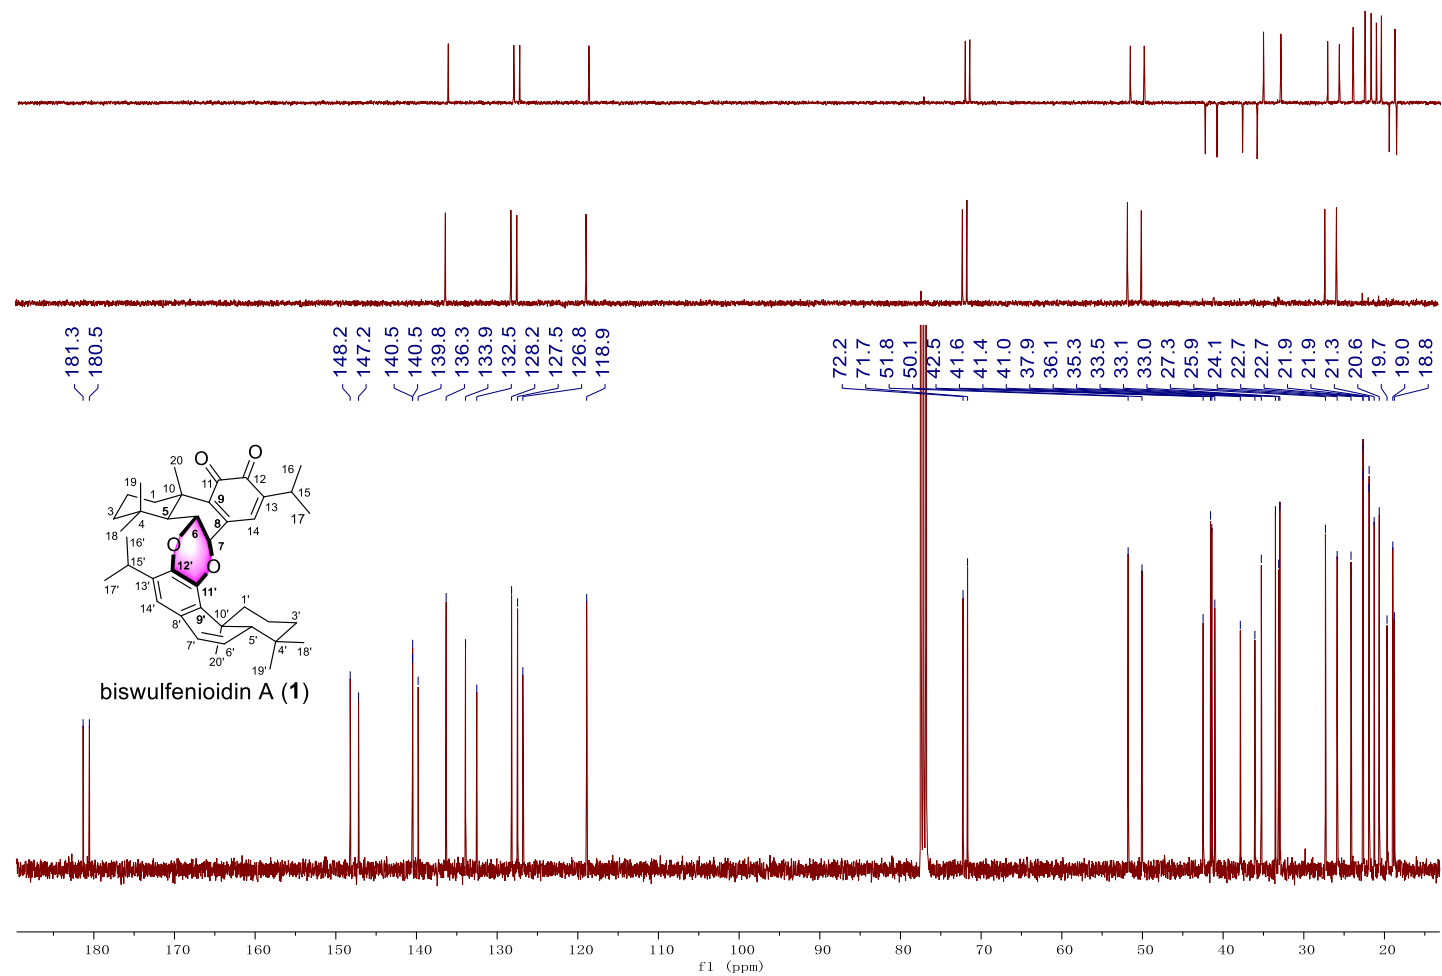

**Figure S4.** <sup>13</sup>C and DEPT NMR spectra of biswulfenioidin A (1) in chloroform (100 MHz)

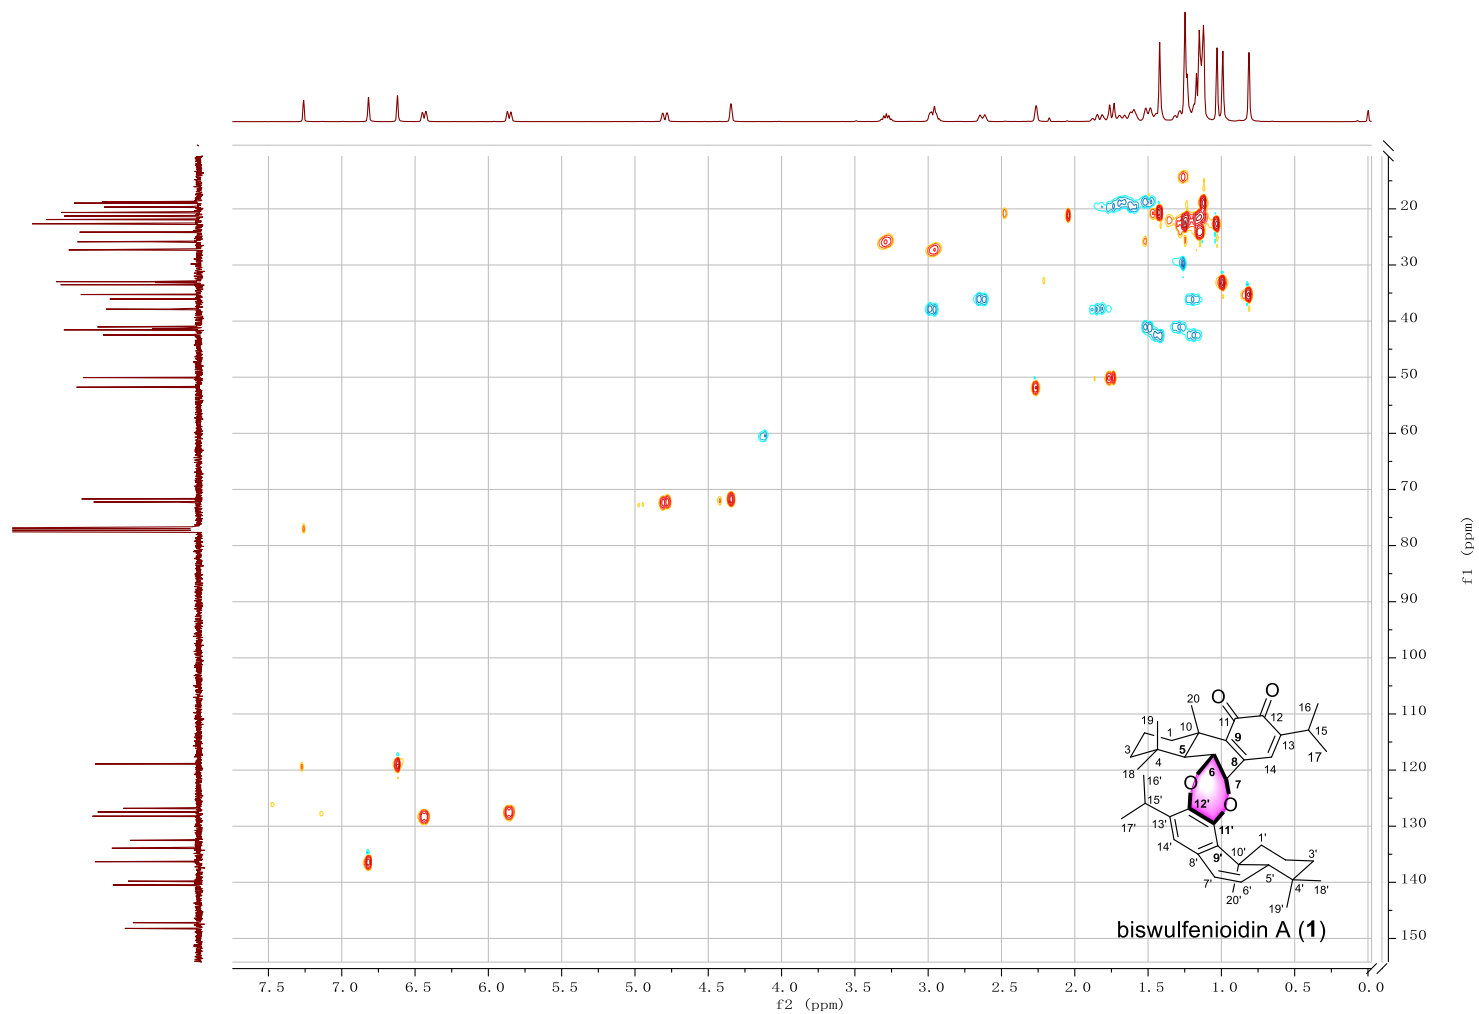

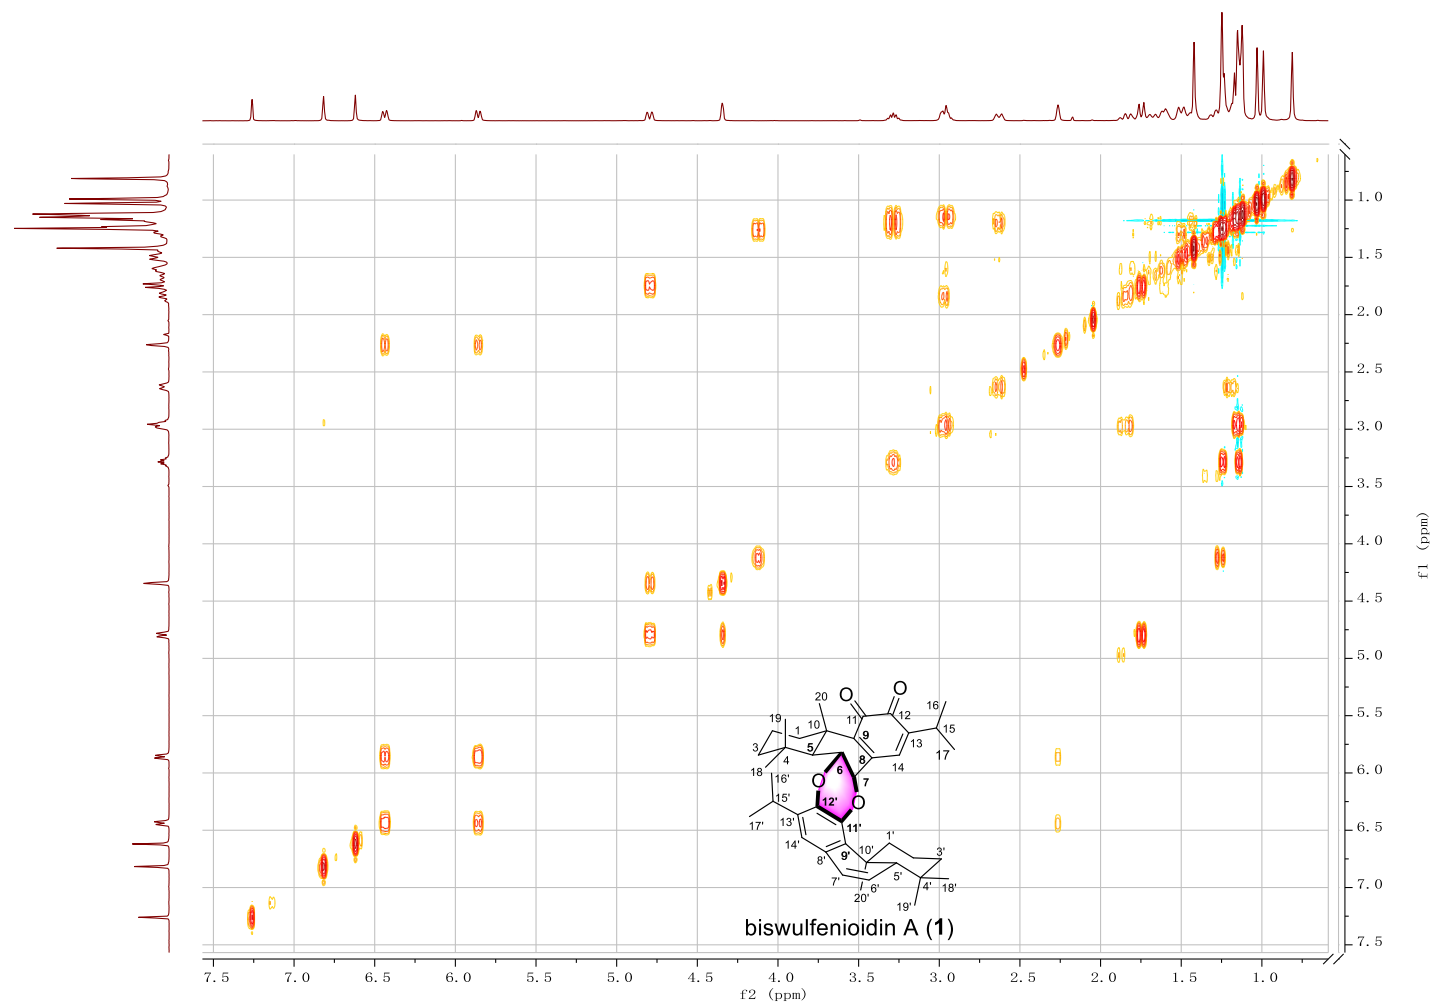

**Figure S6.**  $^1\text{H}$ - $^1\text{H}$  COSY spectrum of bisulfenioidin A (1) in chloroform (400 MHz)

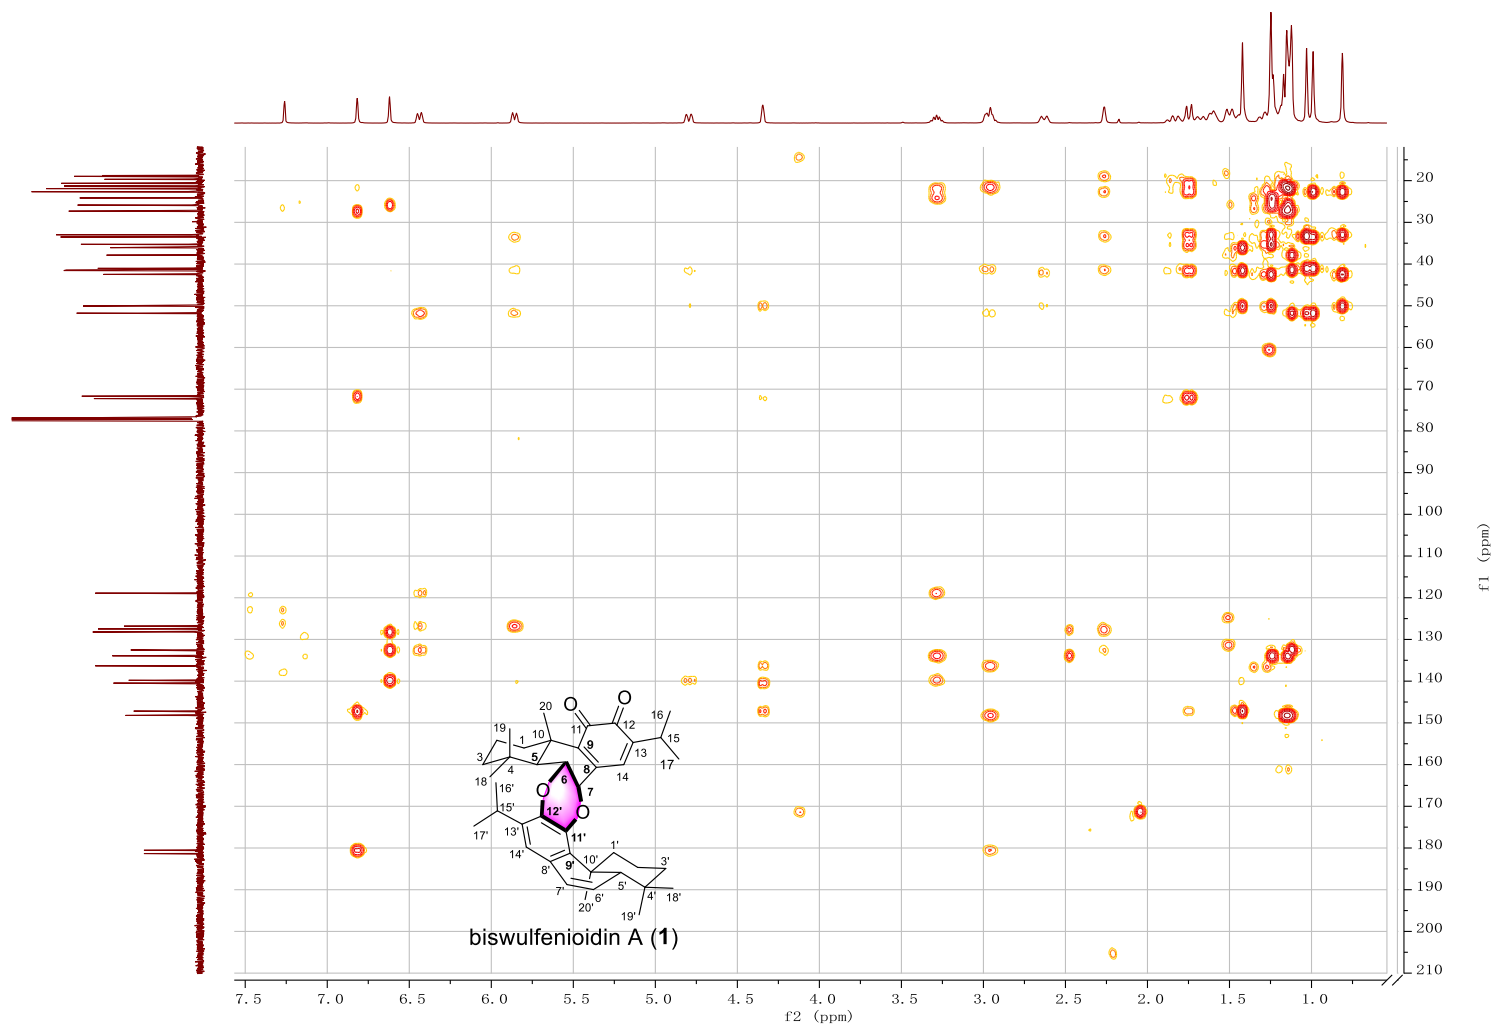

**Figure S7.** HMBC spectrum of bisulfenioidin A (1) in chloroform (400 MHz)

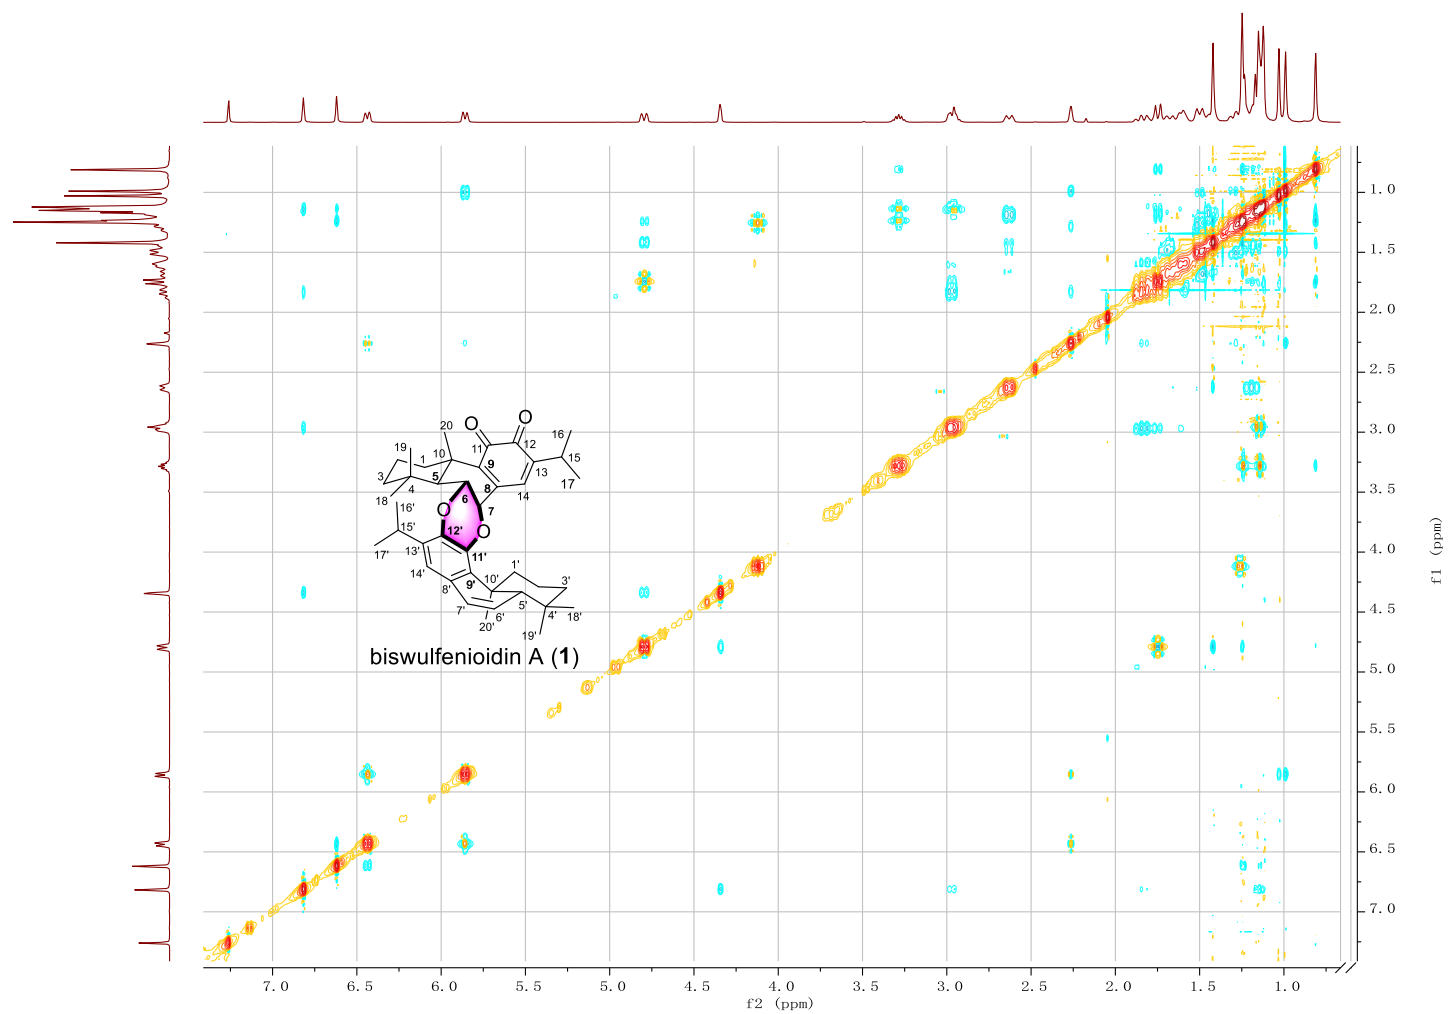

MS Formula Results: + Scan (0.225 min) Sub (JJS-16+++d)

| m/z     | Ion                | Formula                                        | Abundance |
|---------|--------------------|------------------------------------------------|-----------|
| 597.394 | (M+H) <sup>+</sup> | C <sub>40</sub> H <sub>53</sub> O <sub>4</sub> | 110126.5  |

  

| Best                                | Formula (M)                                    | Ion Formula                                    | Score | Cross Score | Calc m/z | Diff (ppm) | Mass Match | Abund Match | Spacing Match |
|-------------------------------------|------------------------------------------------|------------------------------------------------|-------|-------------|----------|------------|------------|-------------|---------------|
| <input checked="" type="checkbox"/> | C <sub>40</sub> H <sub>52</sub> O <sub>4</sub> | C <sub>40</sub> H <sub>53</sub> O <sub>4</sub> | 86.78 |             | 597.3938 | -0.63      | 99.51      | 74.35       | 76.24         |

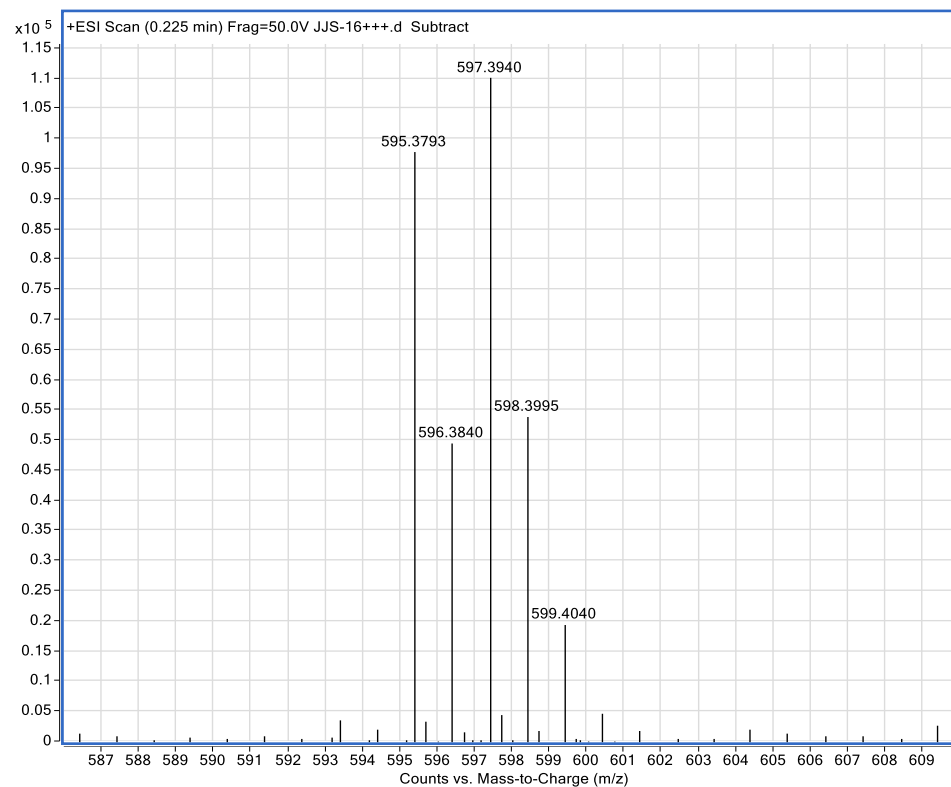

Figure S9. HRESIMS spectrum of biswulfenioidin A (1)



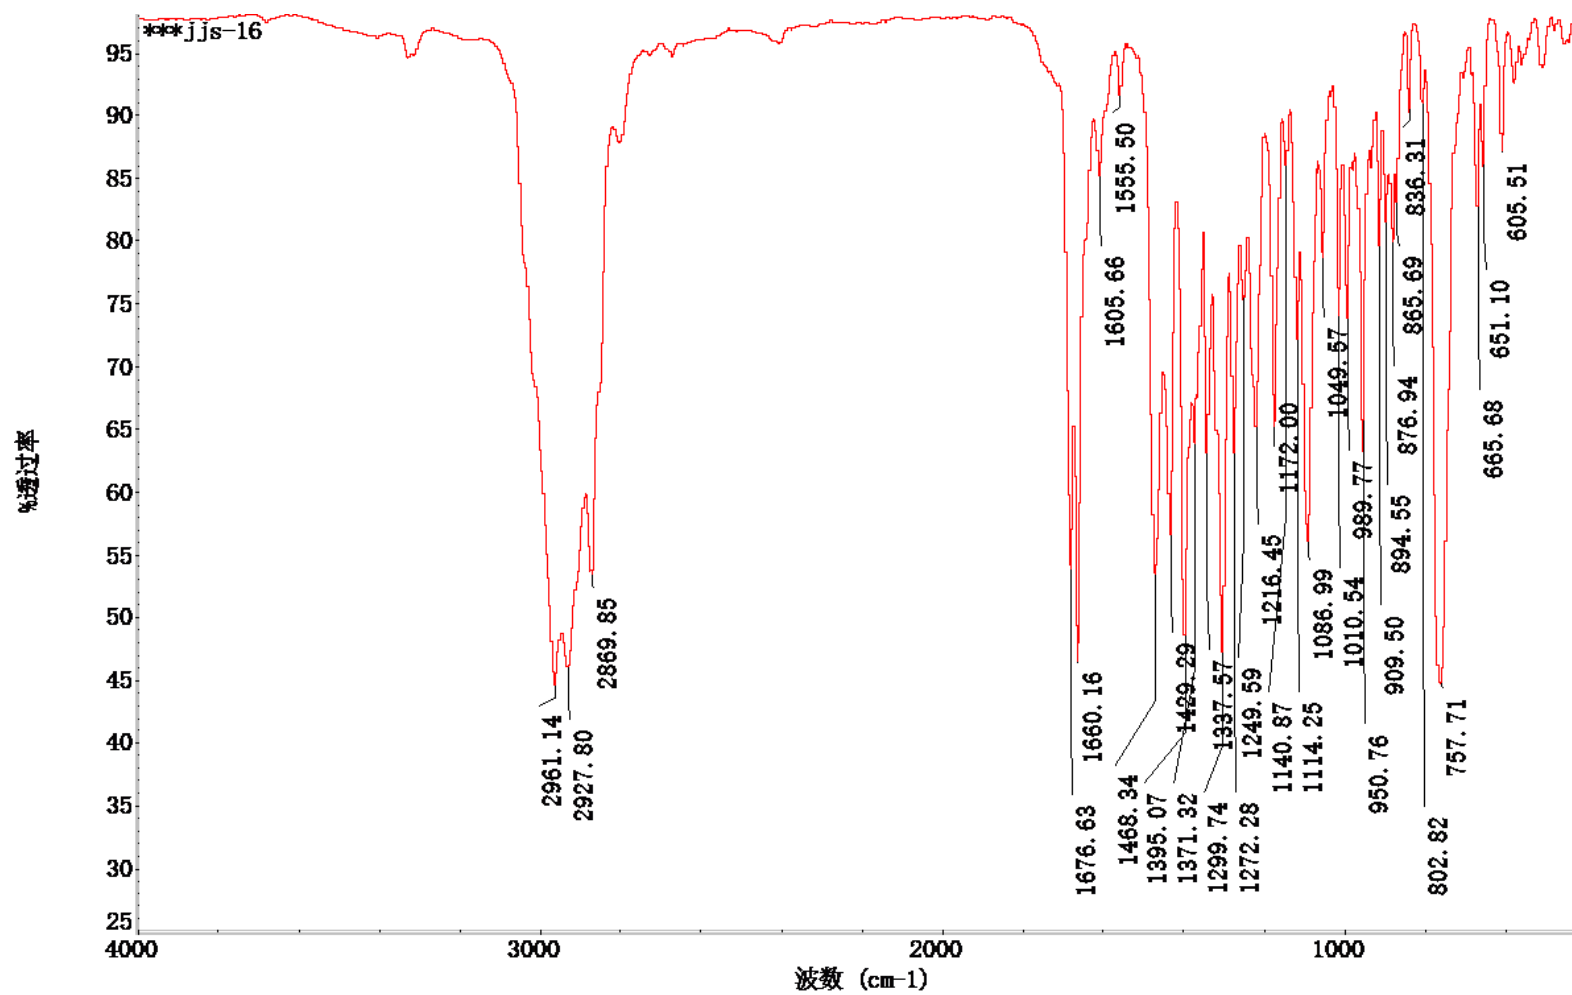

Figure S10. IR spectrum of biswulfenioidin A (1)

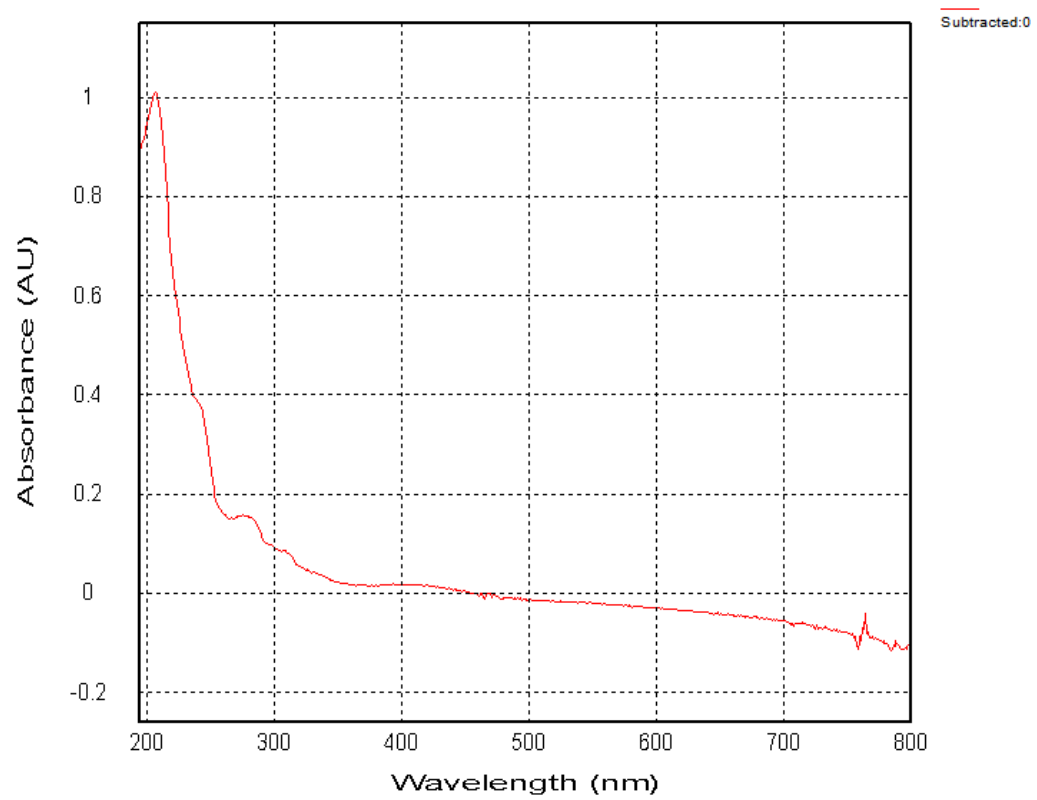

**Figure S11.** UV spectrum of biswulfenioidin A (**1**)

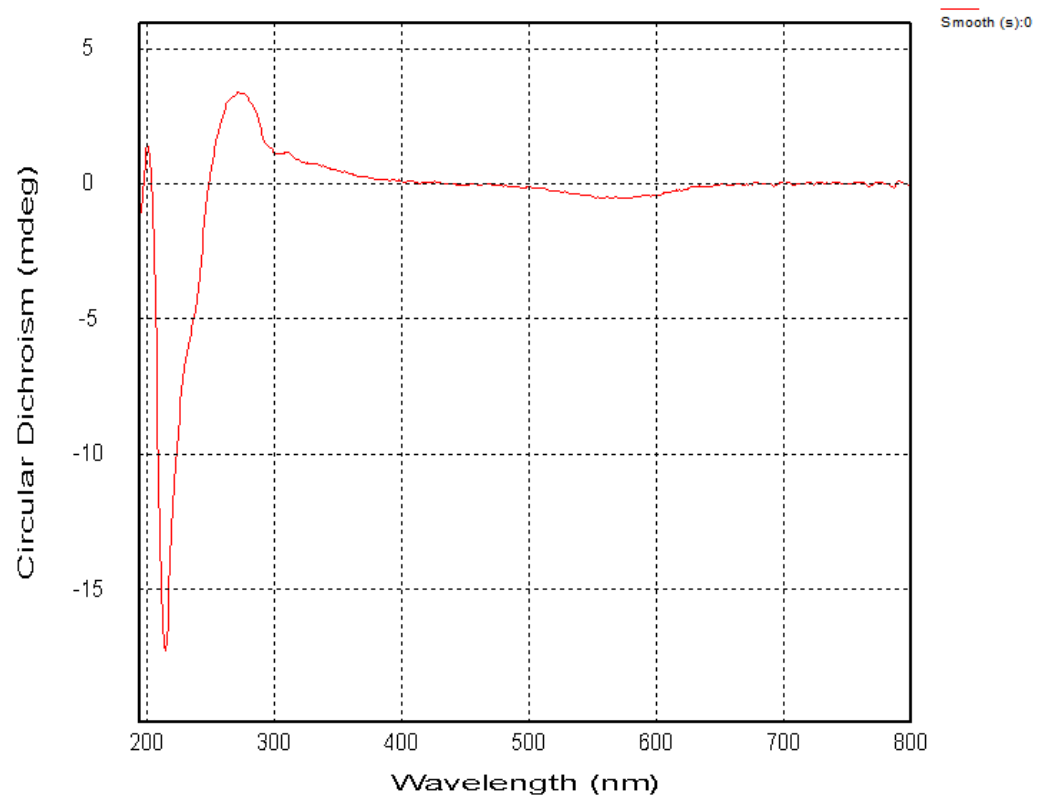

**Figure S12.** CD spectrum of biswulfenoidin A (**1**)

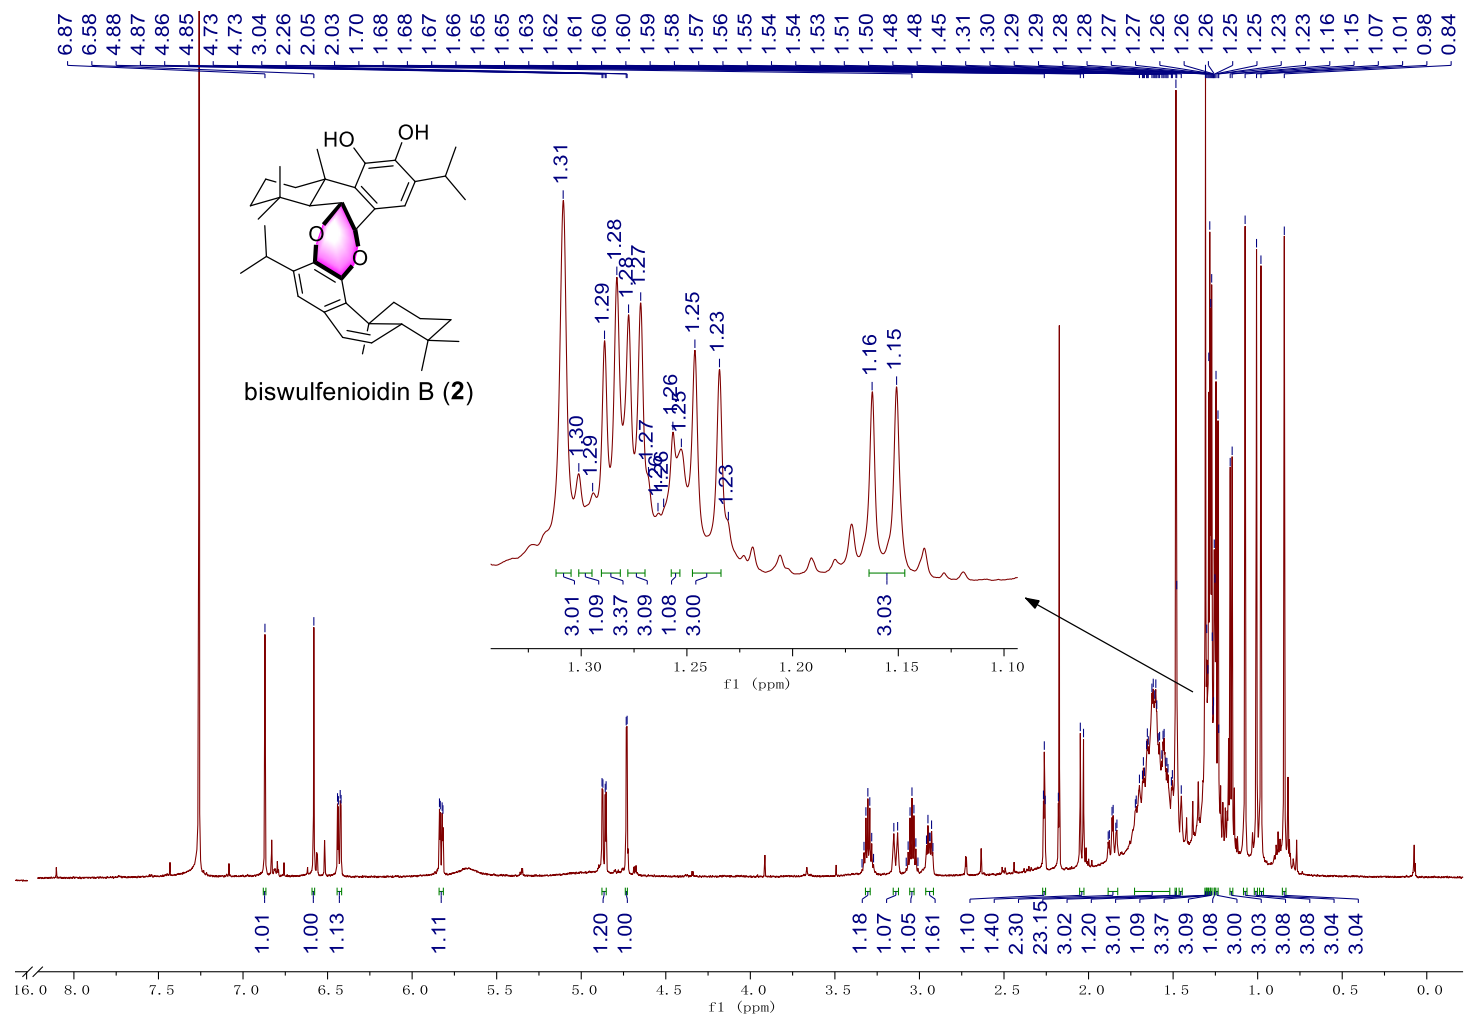

**Figure S13.** <sup>1</sup>H NMR spectrum of biswulfenioidin B (2) in chloroform (600 MHz)

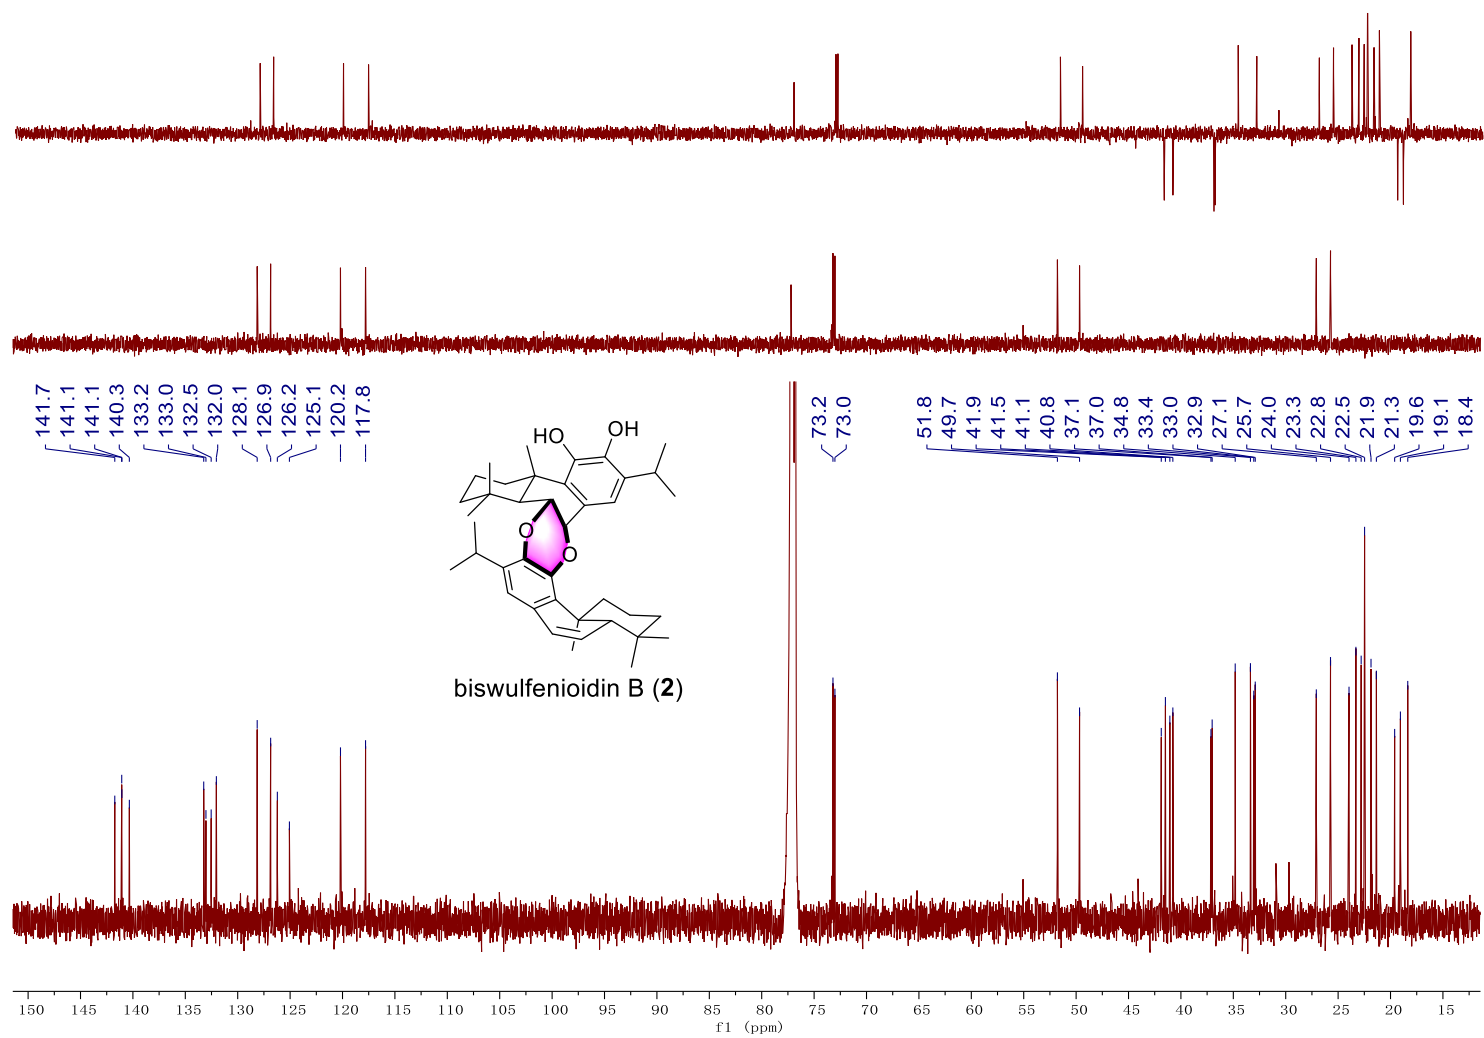

**Figure S14.**  $^{13}\text{C}$  and DEPT NMR spectra of biswulfenioidin B (2) in chloroform (150 MHz)

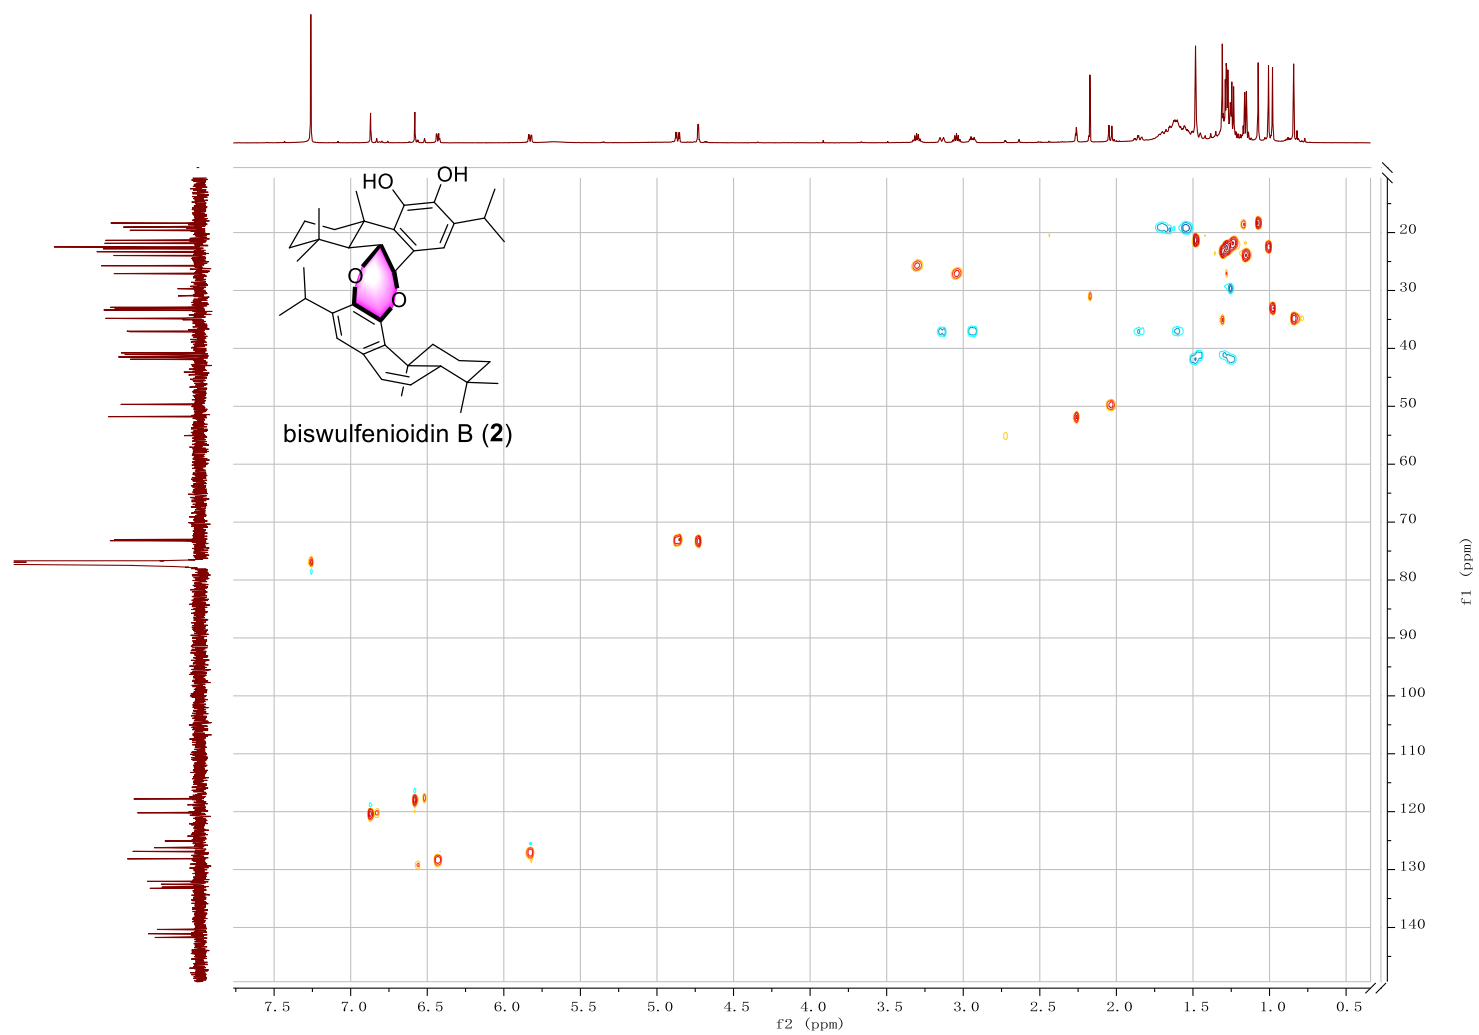

**Figure S15.** HSQC spectrum of biswulfenioidin B (2) in chloroform (600 MHz)

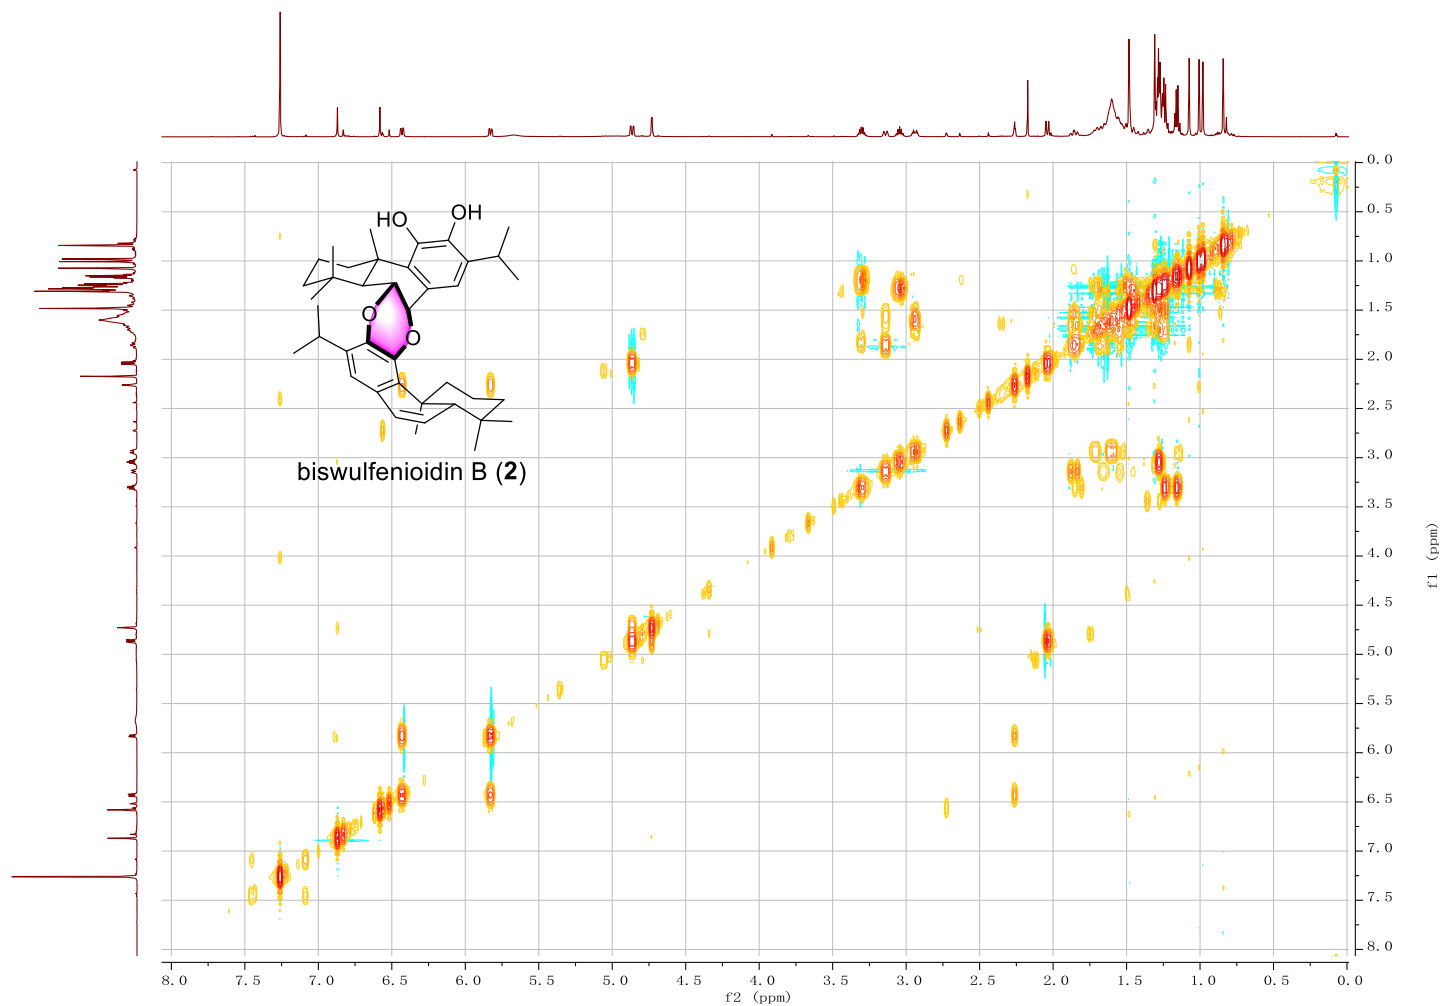

**Figure S16.**  $^1\text{H}$ - $^1\text{H}$  COSY spectrum of biswulfenioidin B (2) in chloroform (600 MHz)

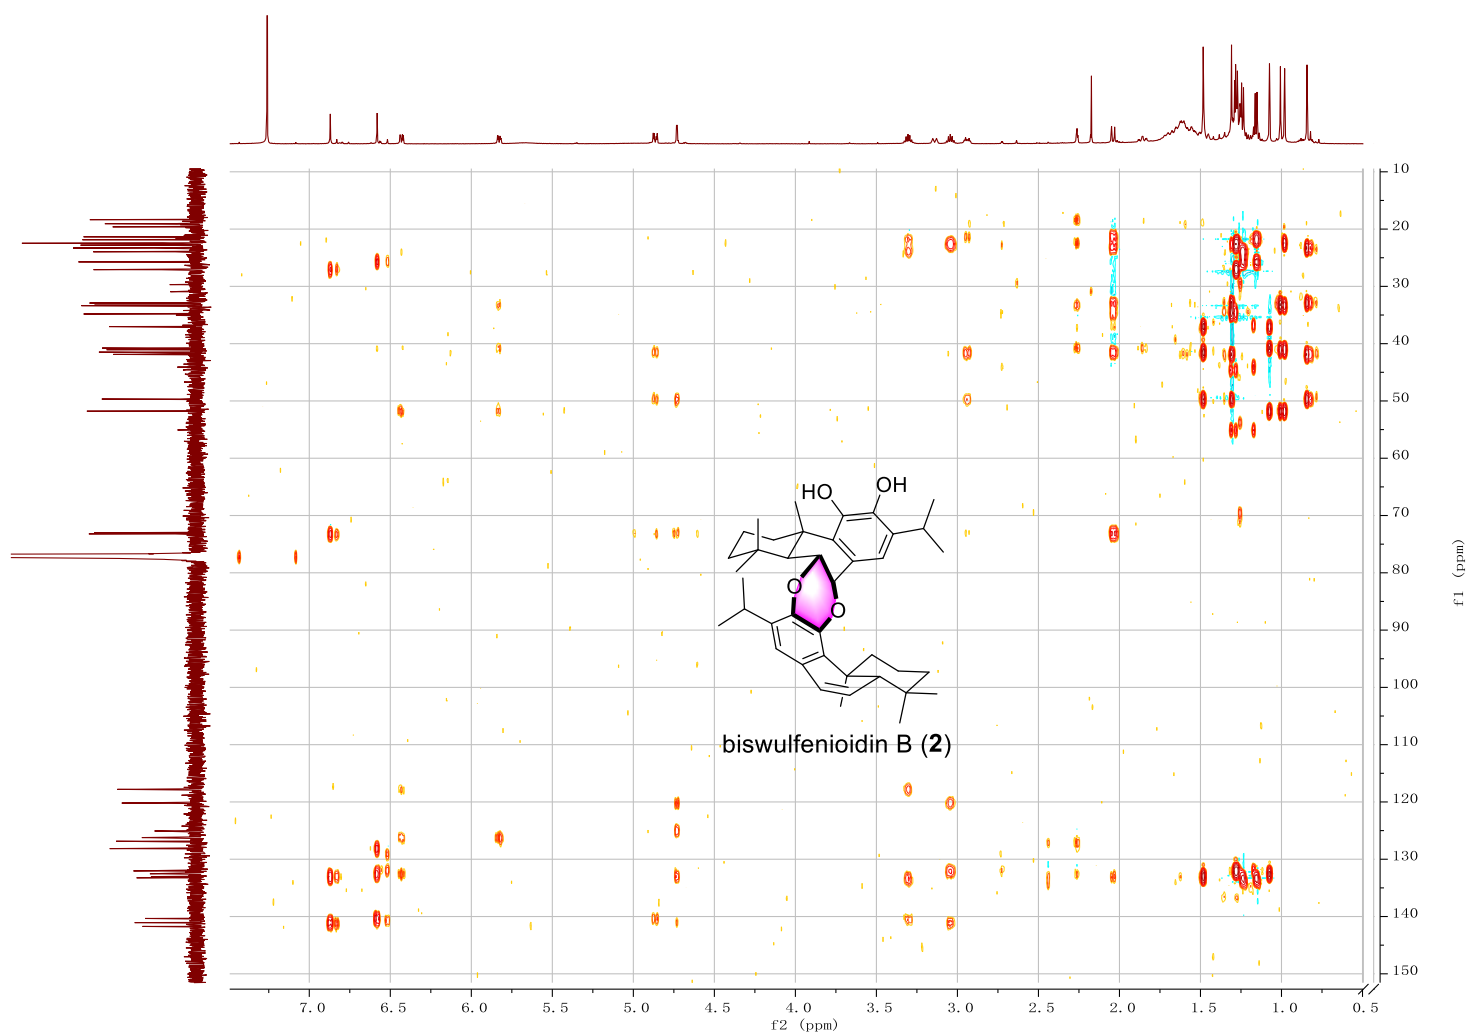

**Figure S17.** HMBC spectrum of biswulfenioidin B (2) in chloroform (600 MHz)



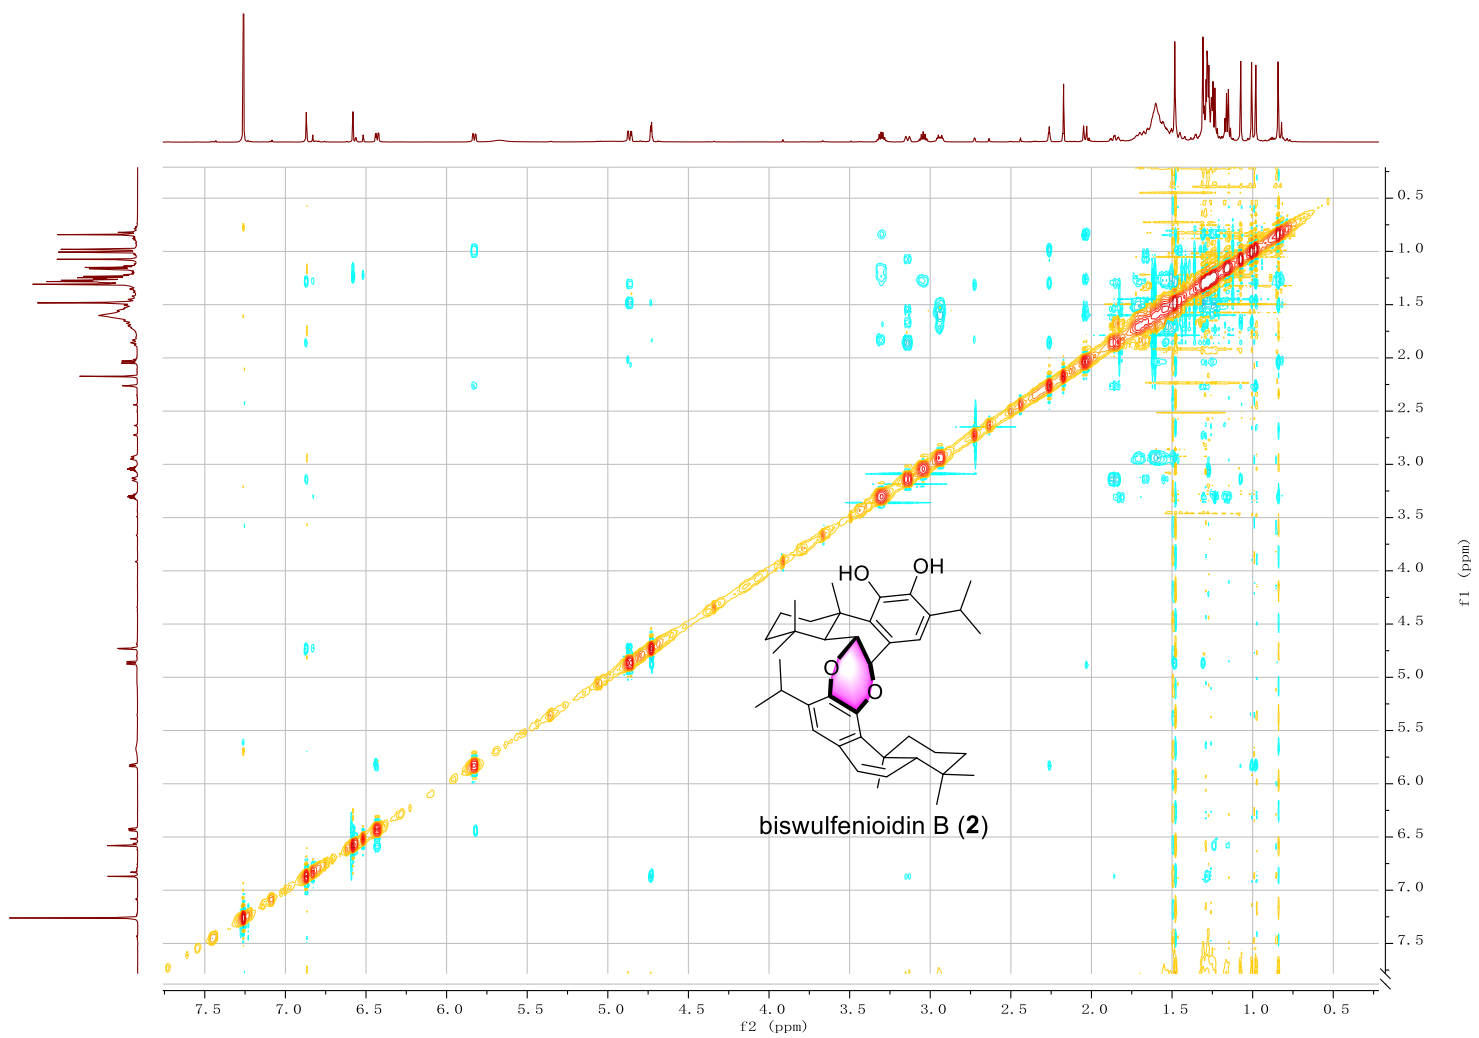

**Figure S18.** ROESY spectrum of biswulfenioidin B (2) in chloroform (600 MHz)

10 #153 RT: 2.93 AV: 1 NL: 1.74E6  
T: FTMS + c ESI Full ms [100.00-800.00]

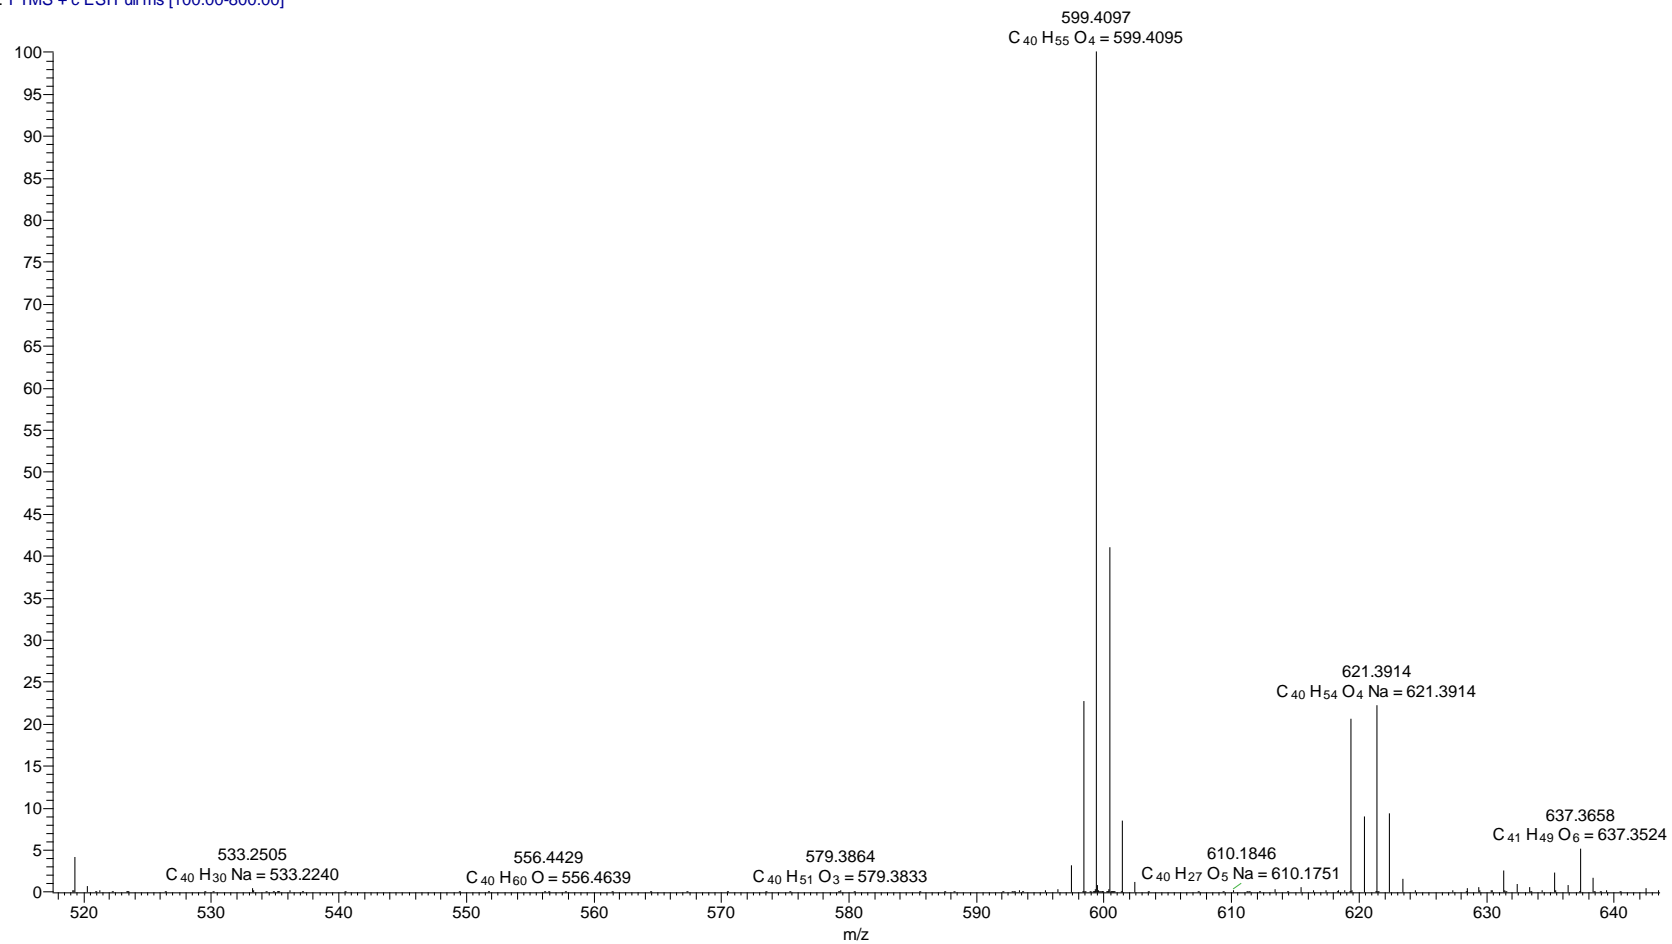

**Figure S19.** HRESIMS spectrum of biswulfenioidin B (2)

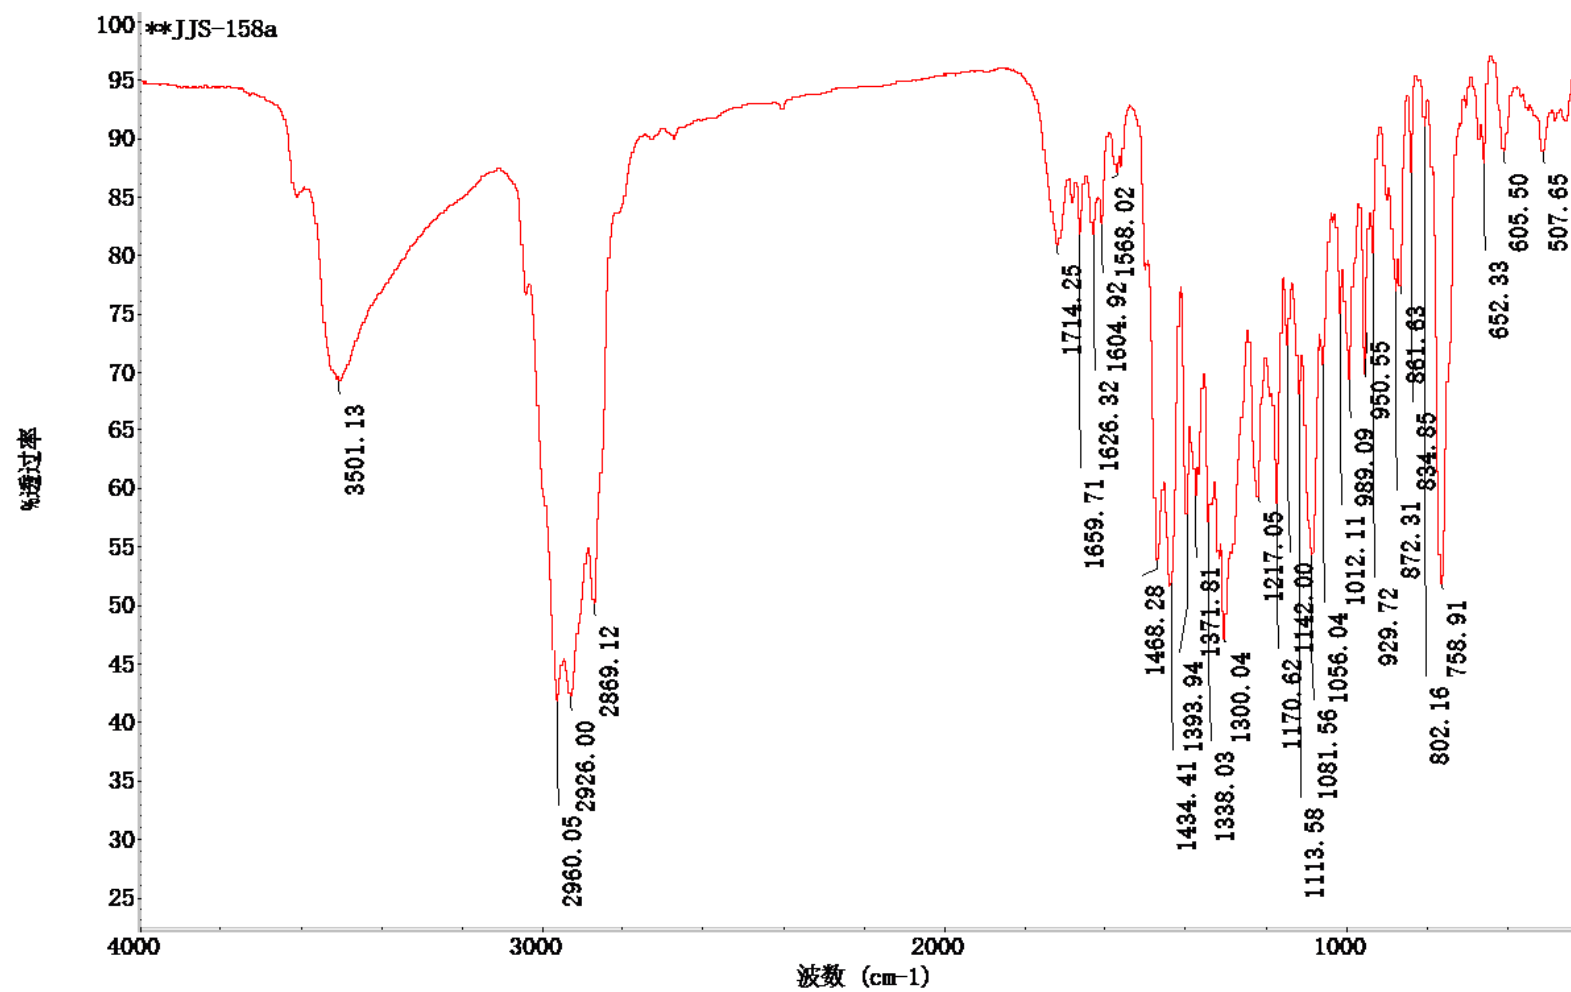

Figure S20. IR spectrum of biswulfenioidin B (2)

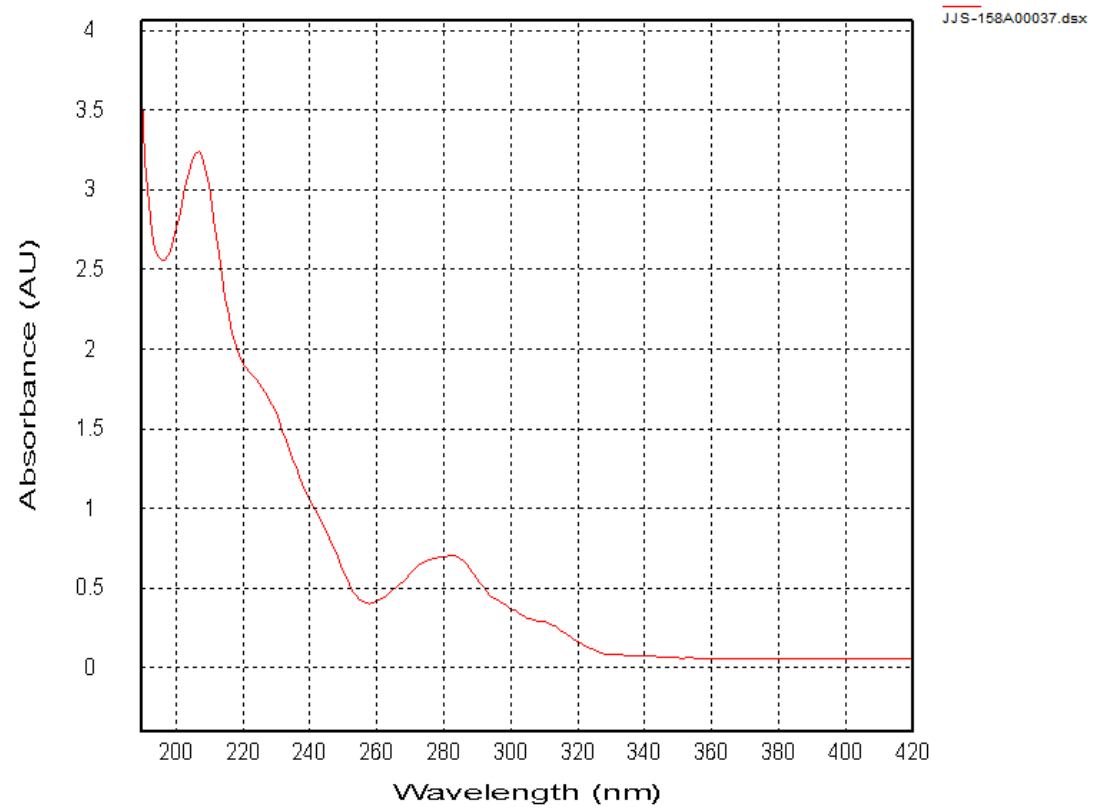

**Figure S21.** UV spectrum of biswulfenioidin B (2)

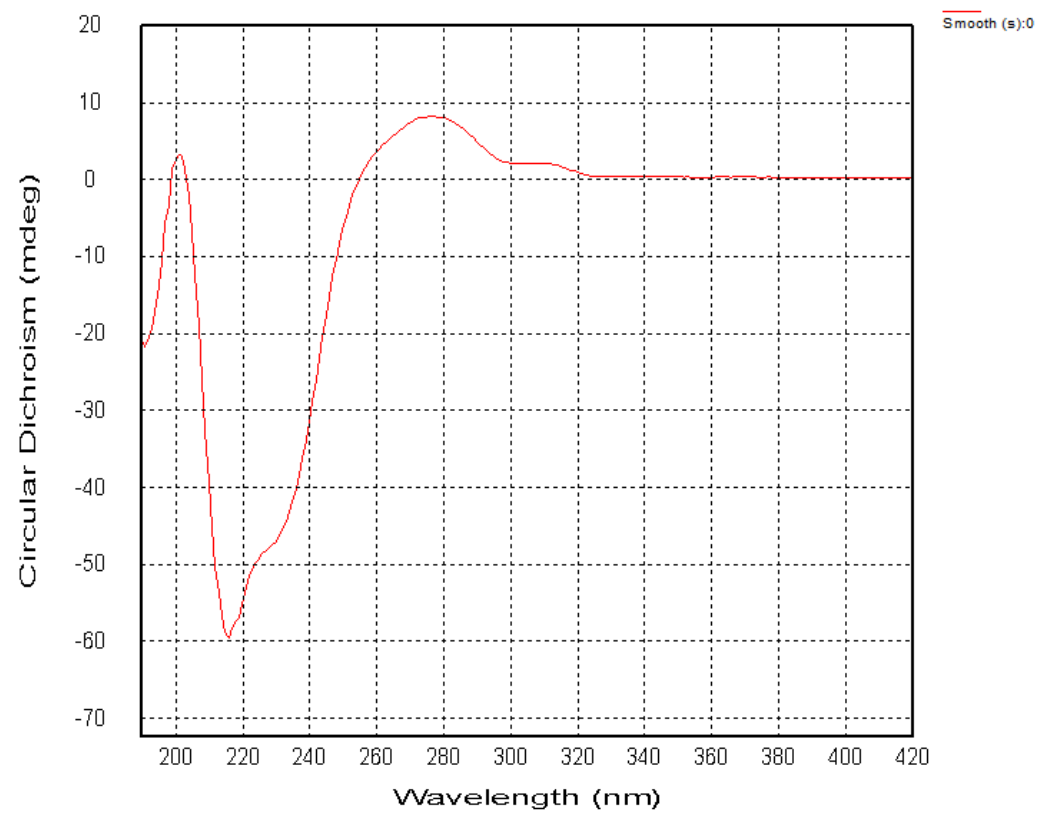

**Figure S22.** CD spectrum of biswulfenioidin B (2)

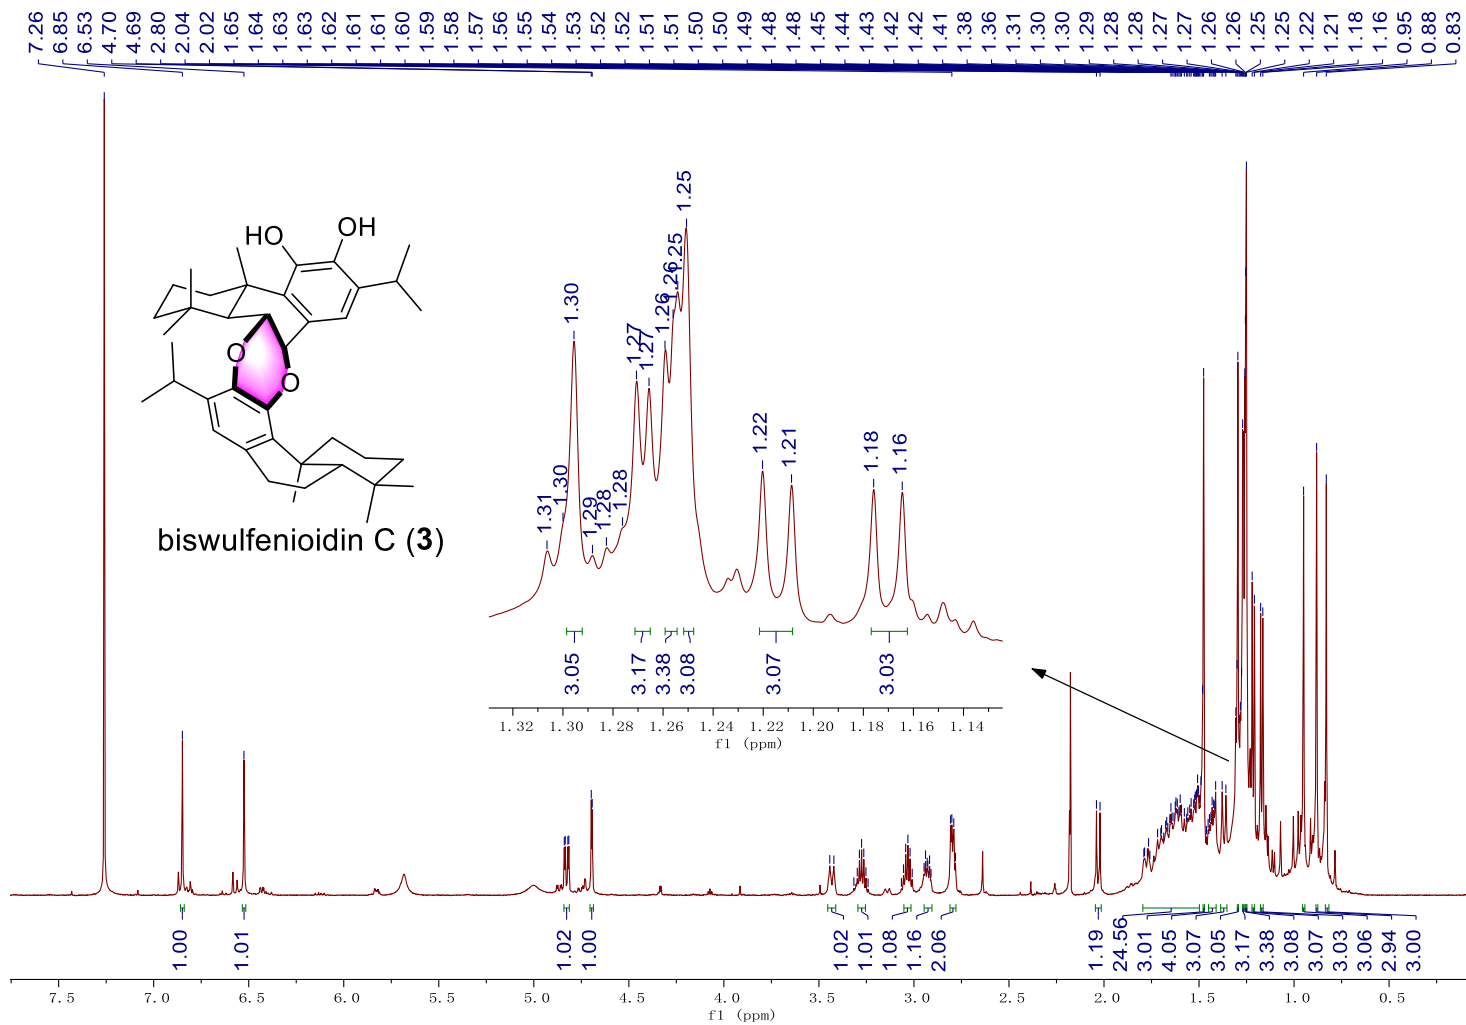

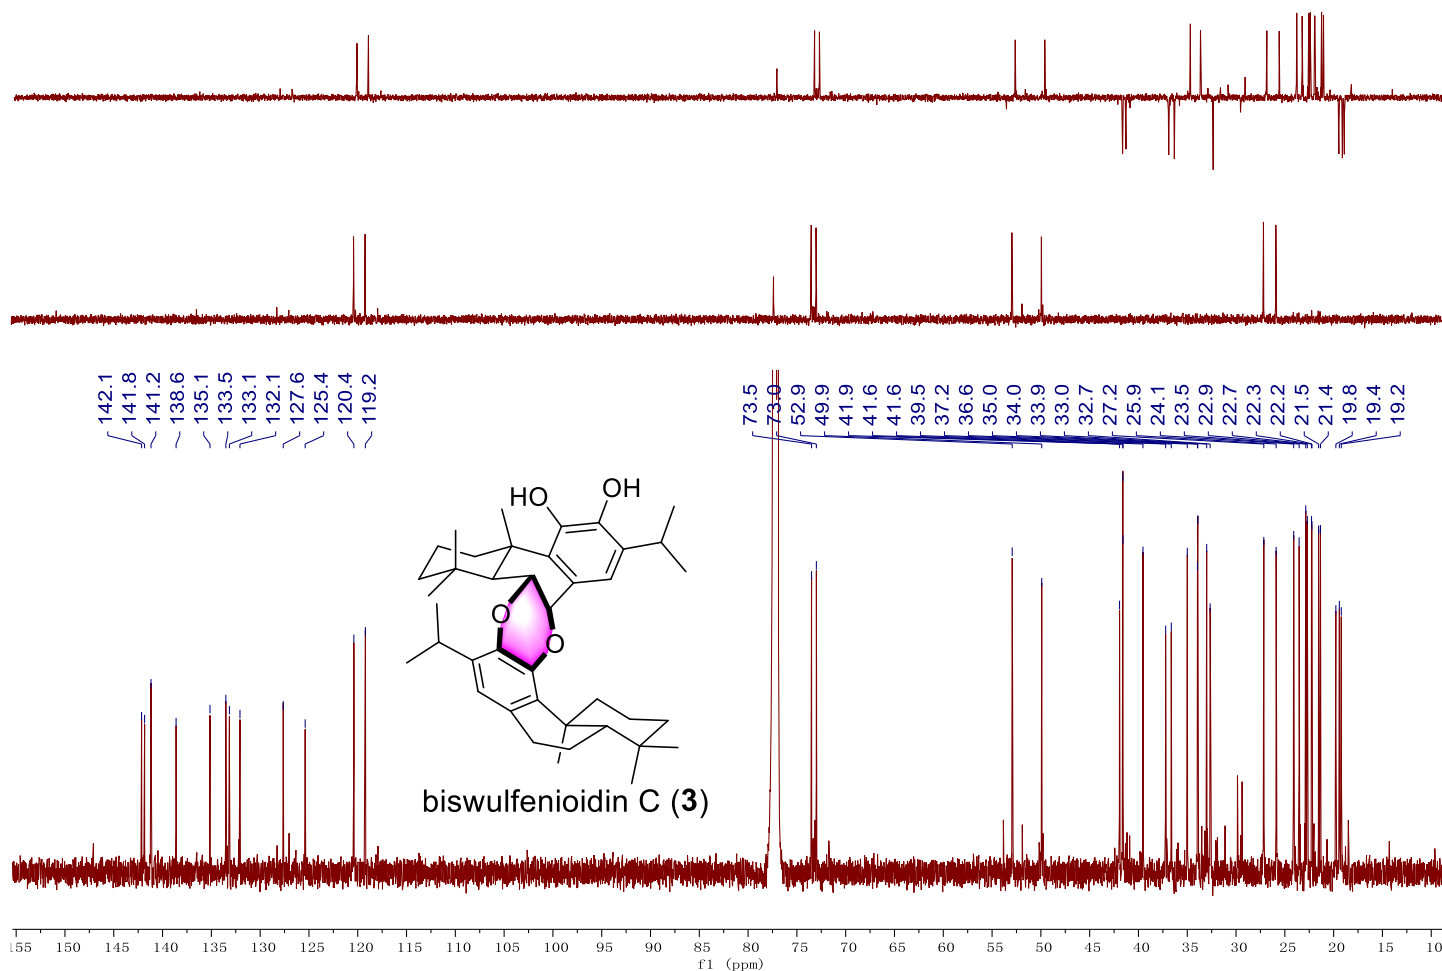

**Figure S24.**  $^{13}\text{C}$  and DEPT NMR spectra of biswulfenioidin C (3) in chloroform (150 MHz)

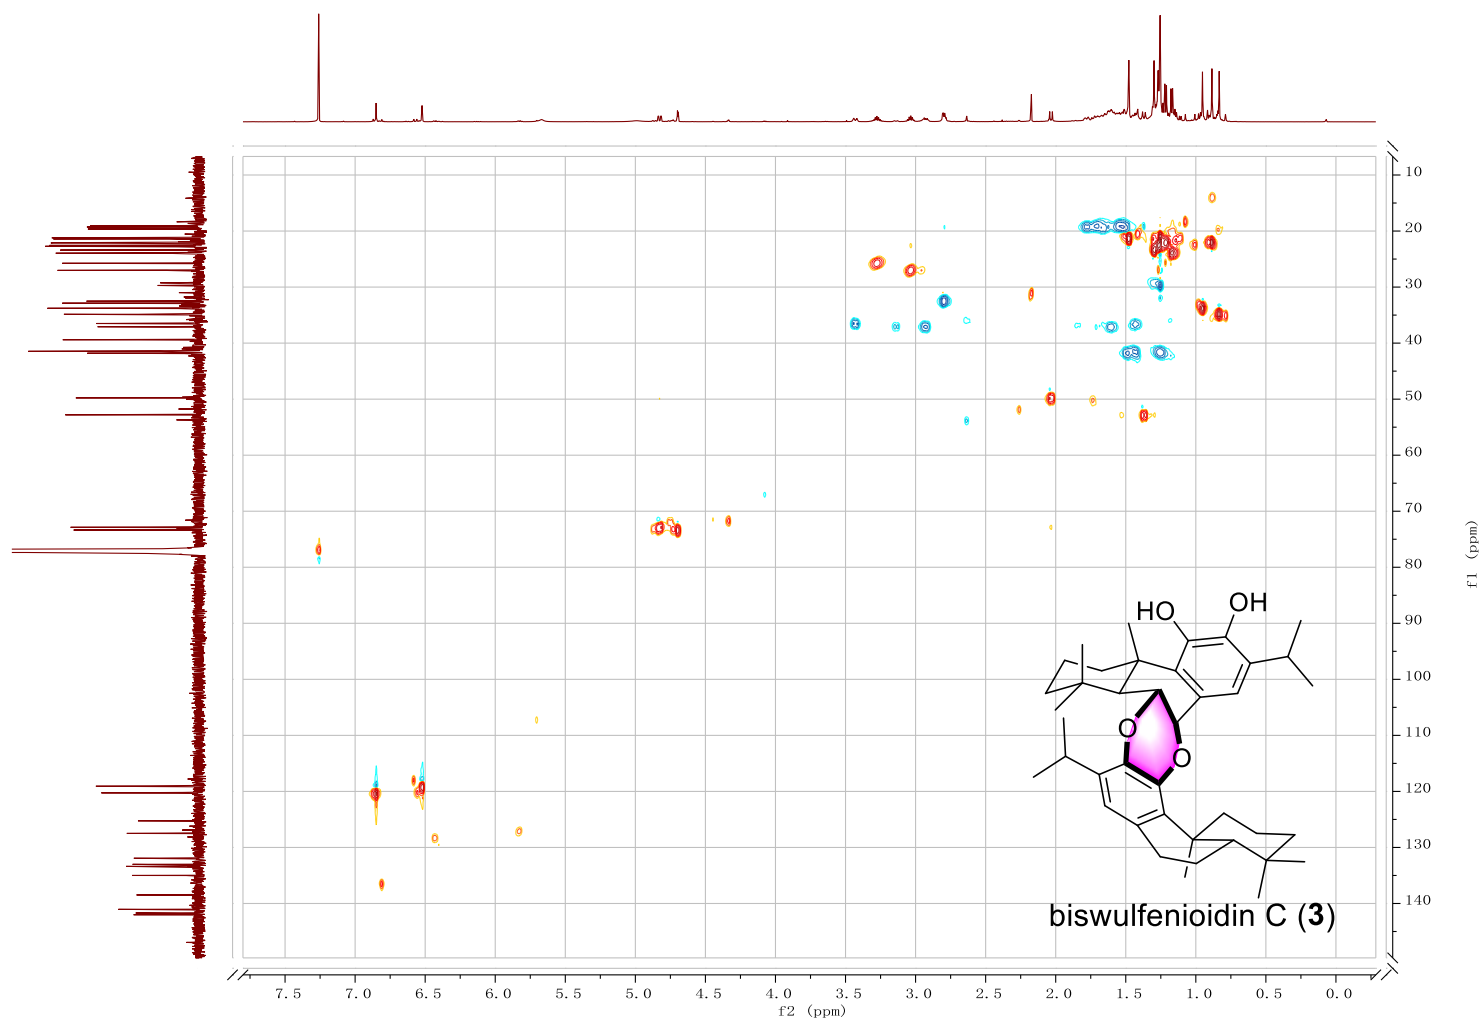

Figure S25. HSQC spectrum of biswulfenioidin C (3) in chloroform (600 MHz)



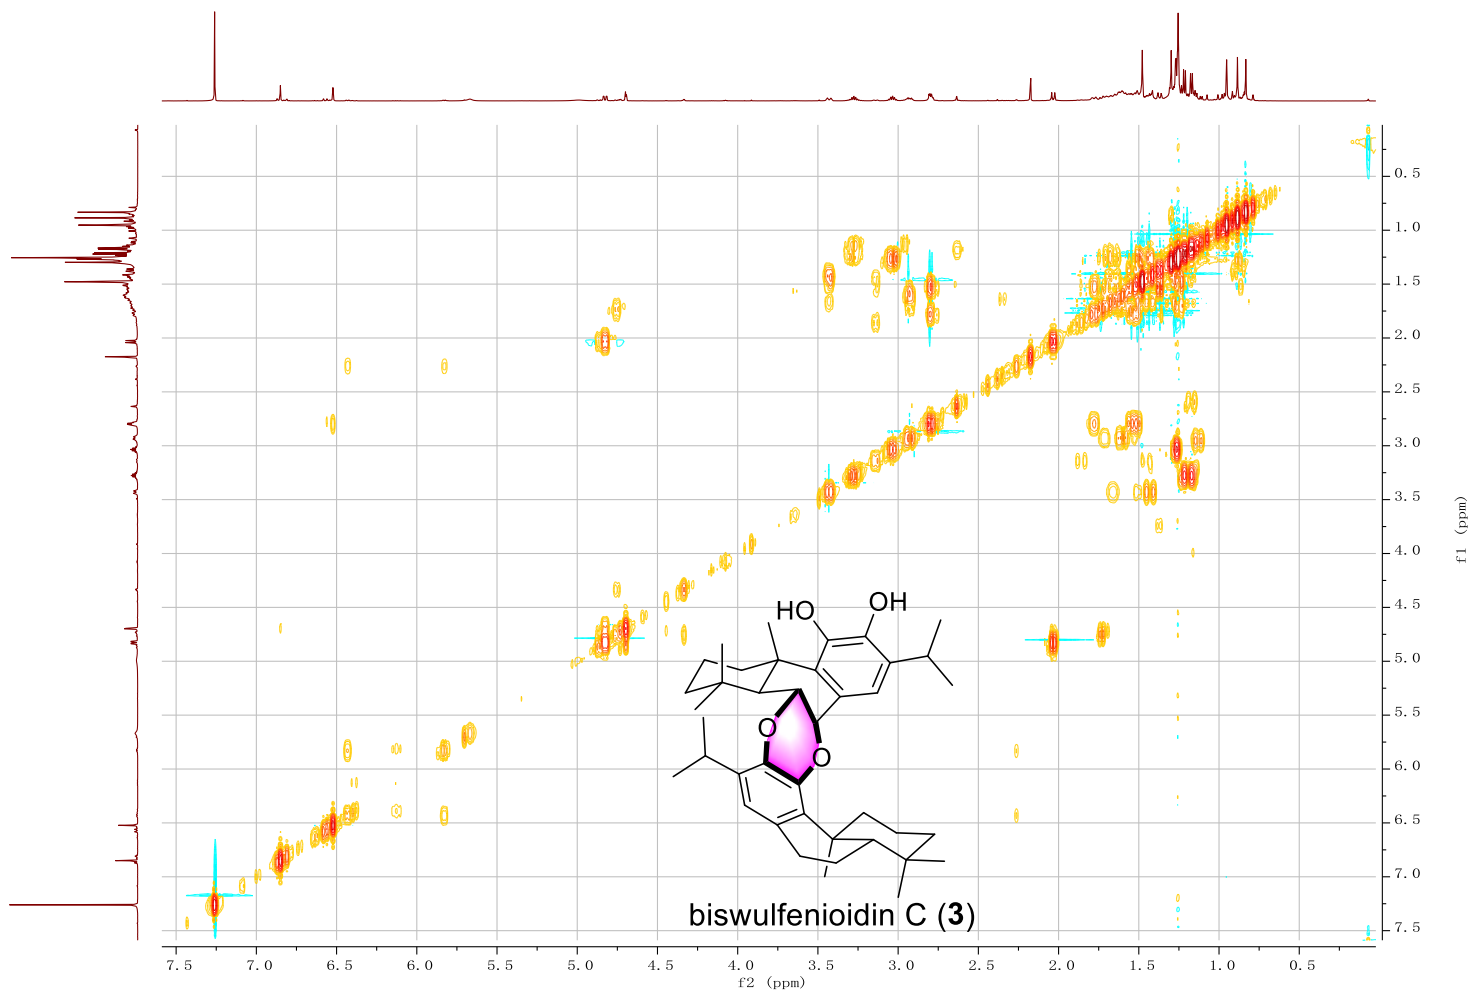

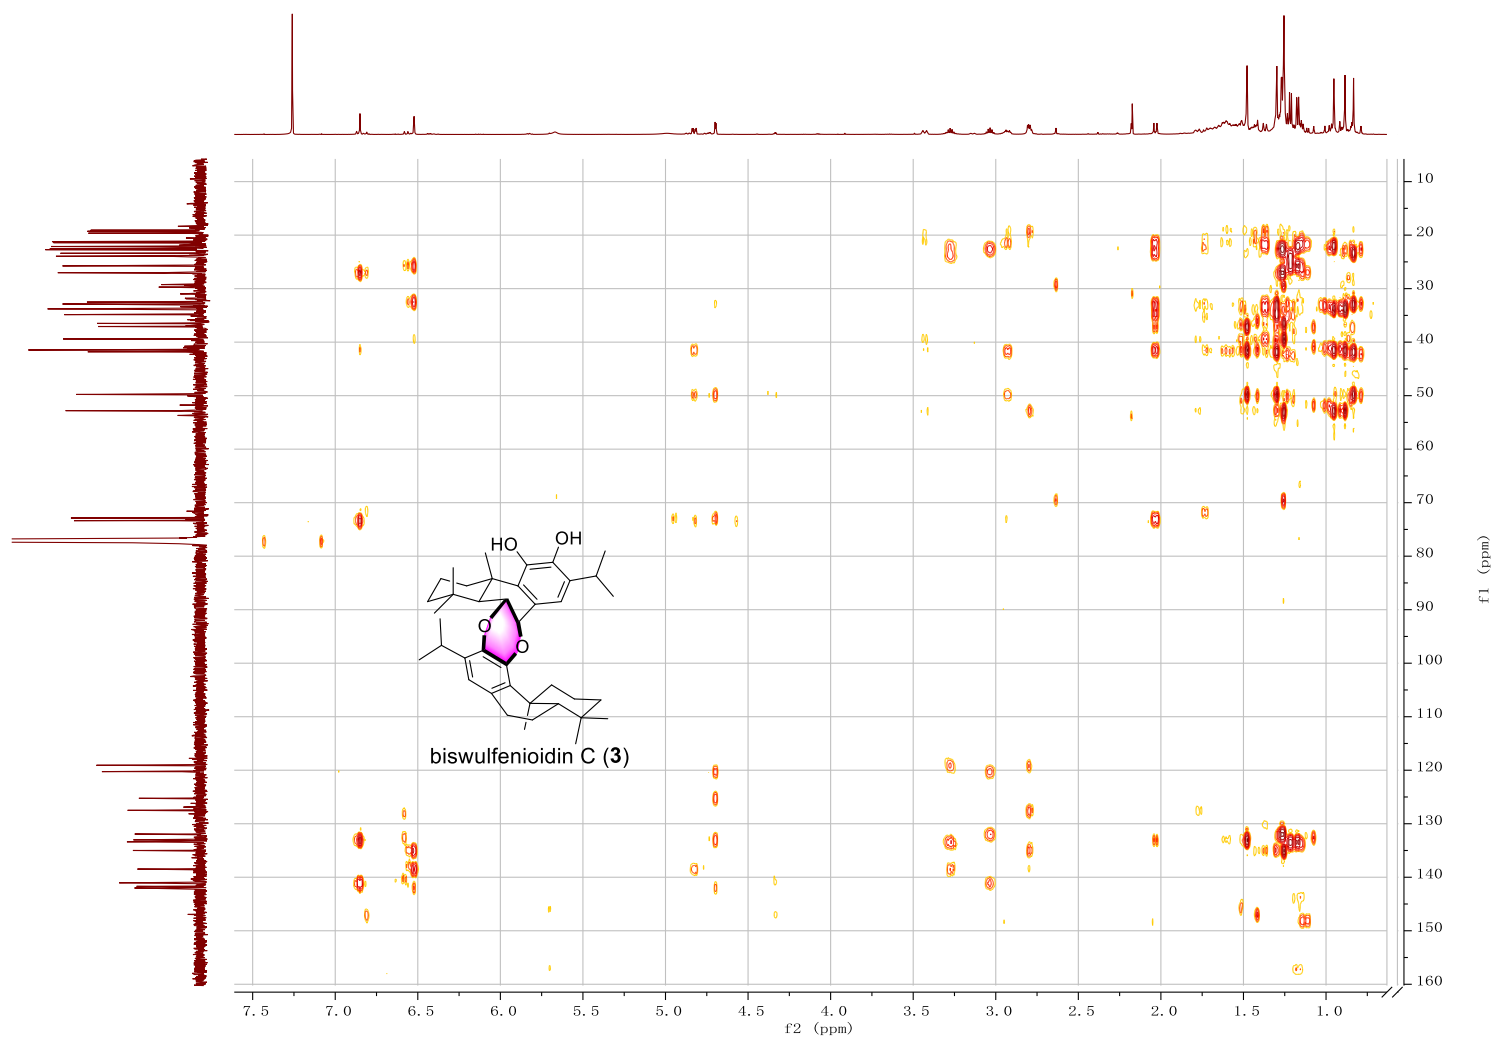

**Figure S27.** HMBC spectrum of biswulfenioidin C (**3**) in chloroform (600 MHz)

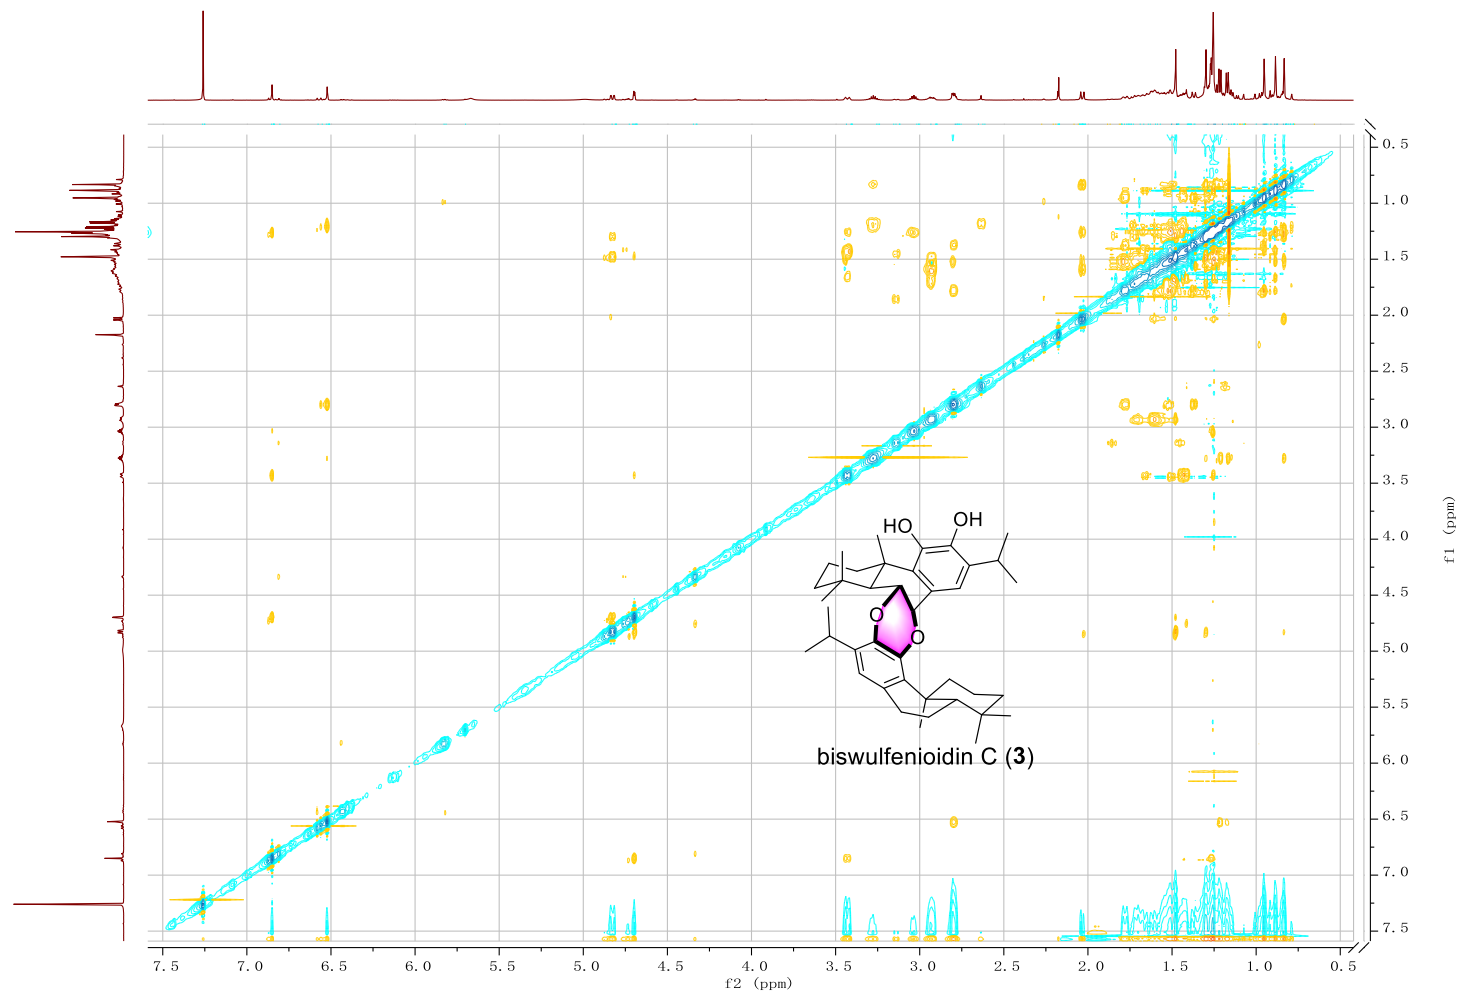

**Figure S28.** ROESY spectrum of biswulfenioidin C (**3**) in chloroform (600 MHz)

160C #72 RT: 1.26 AV: 1 NL: 2.18E6  
T: FTMS + c ESI Full ms [100.00-800.00]

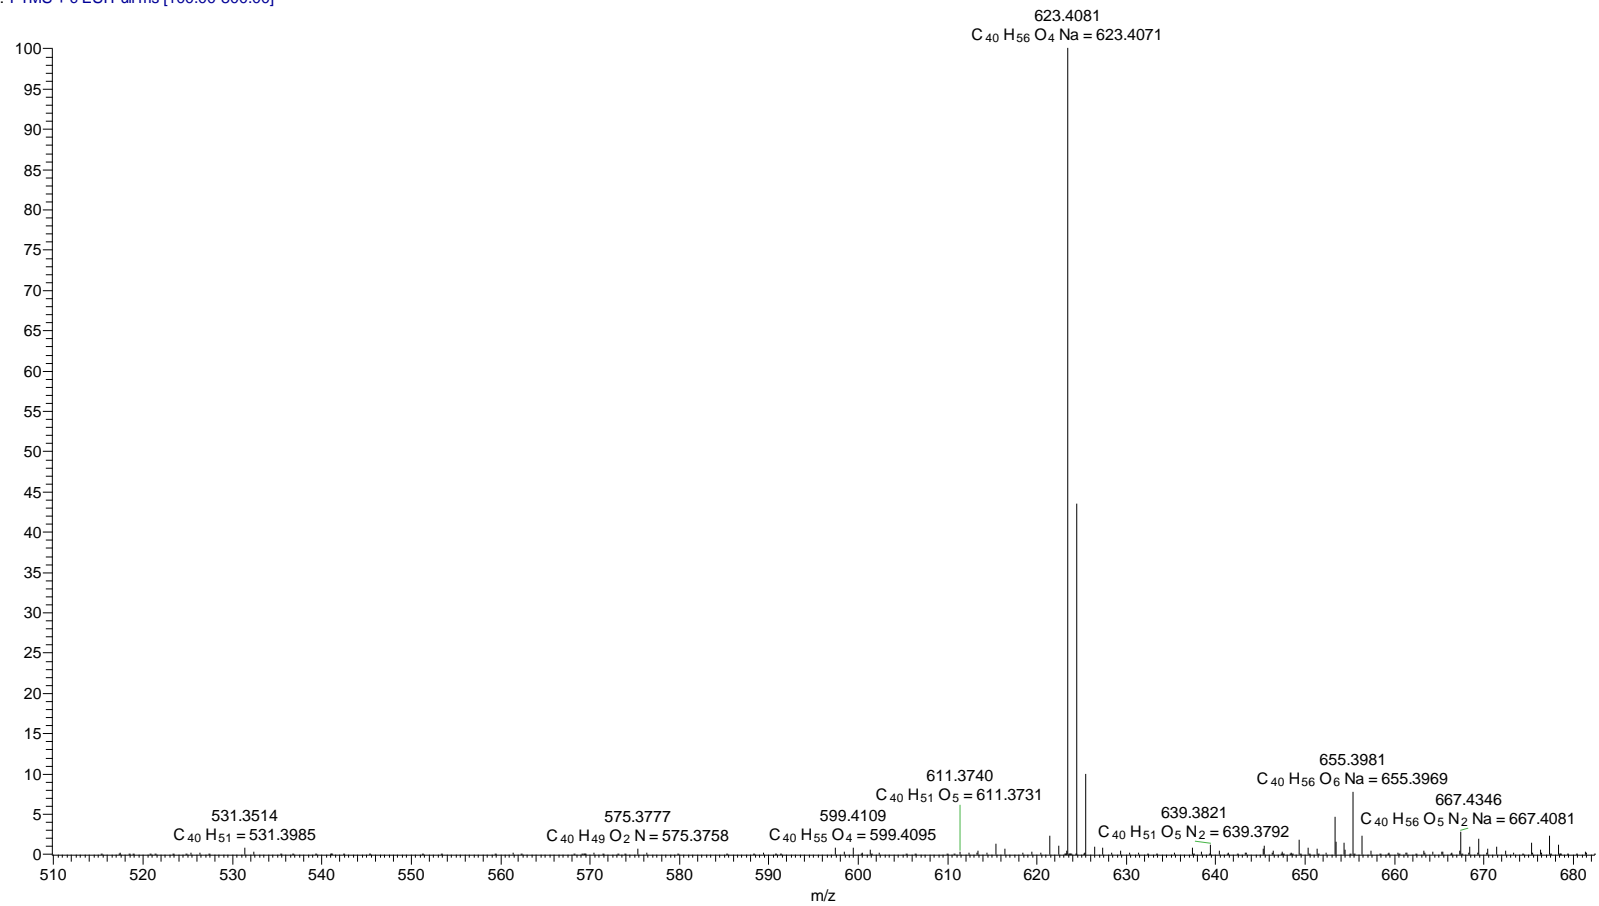

**Figure S29.** HRESIMS spectrum of biswulfenioidin C (3)

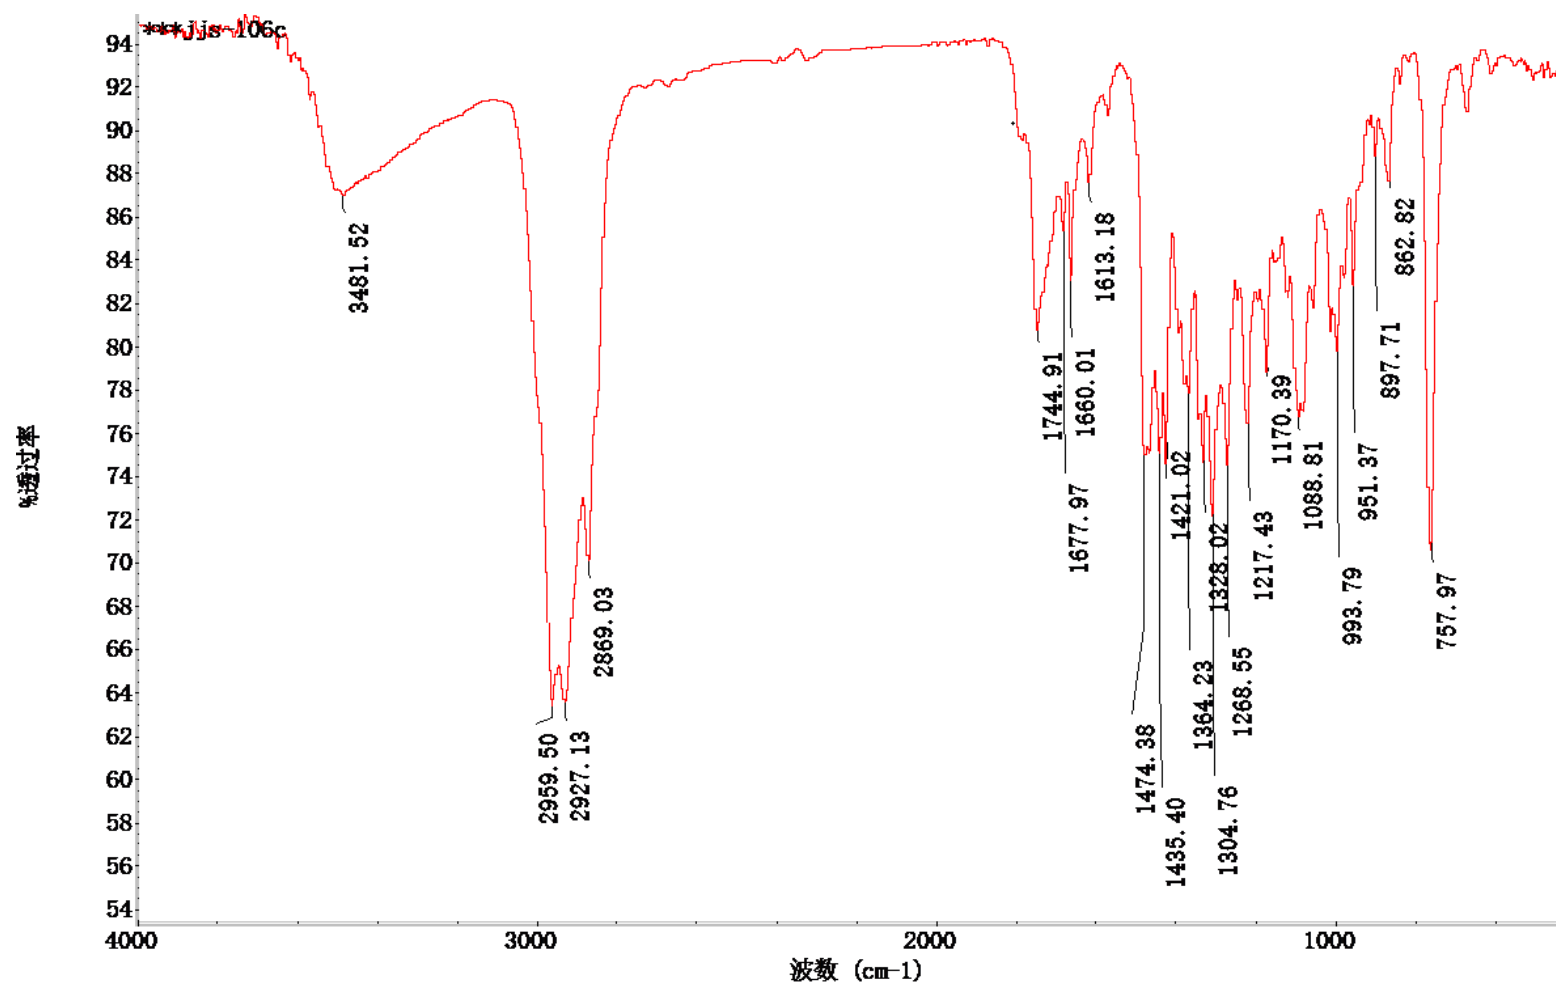

Figure S30. IR spectrum of biswulfenioidin C (3)

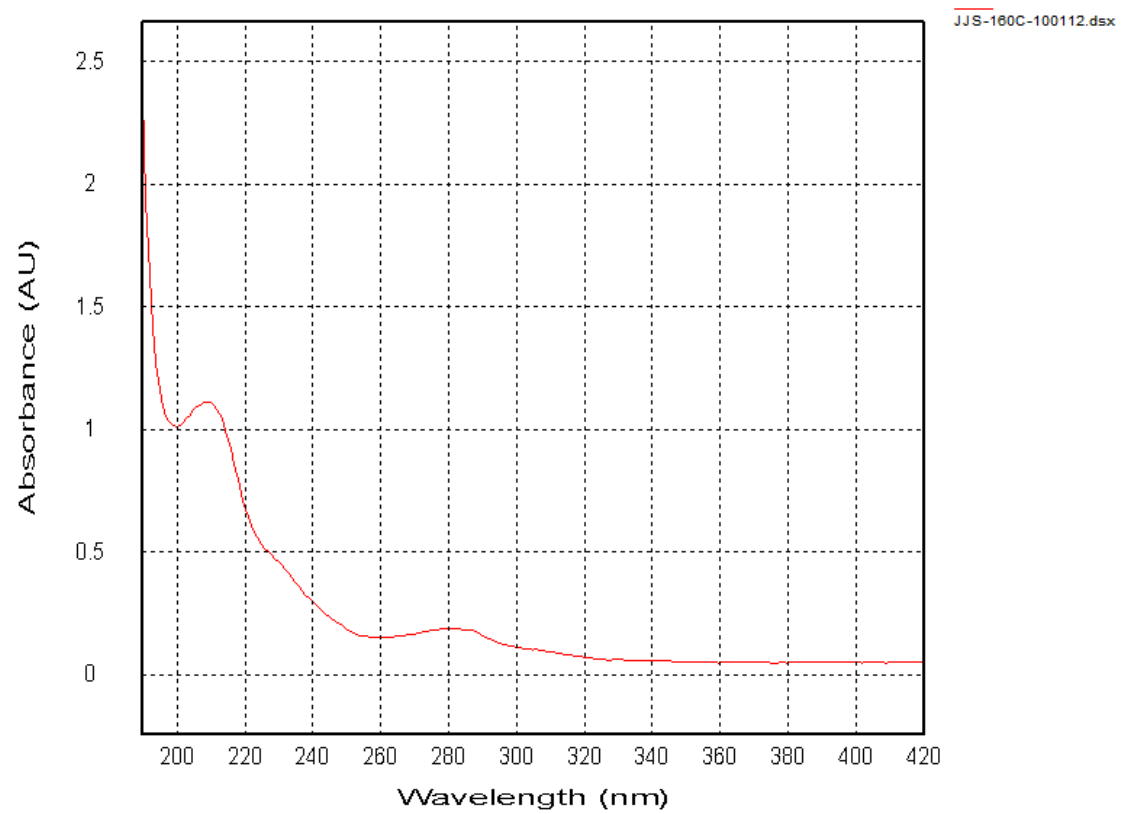

**Figure S31.** UV spectrum of biswulfenioidin C (**3**)

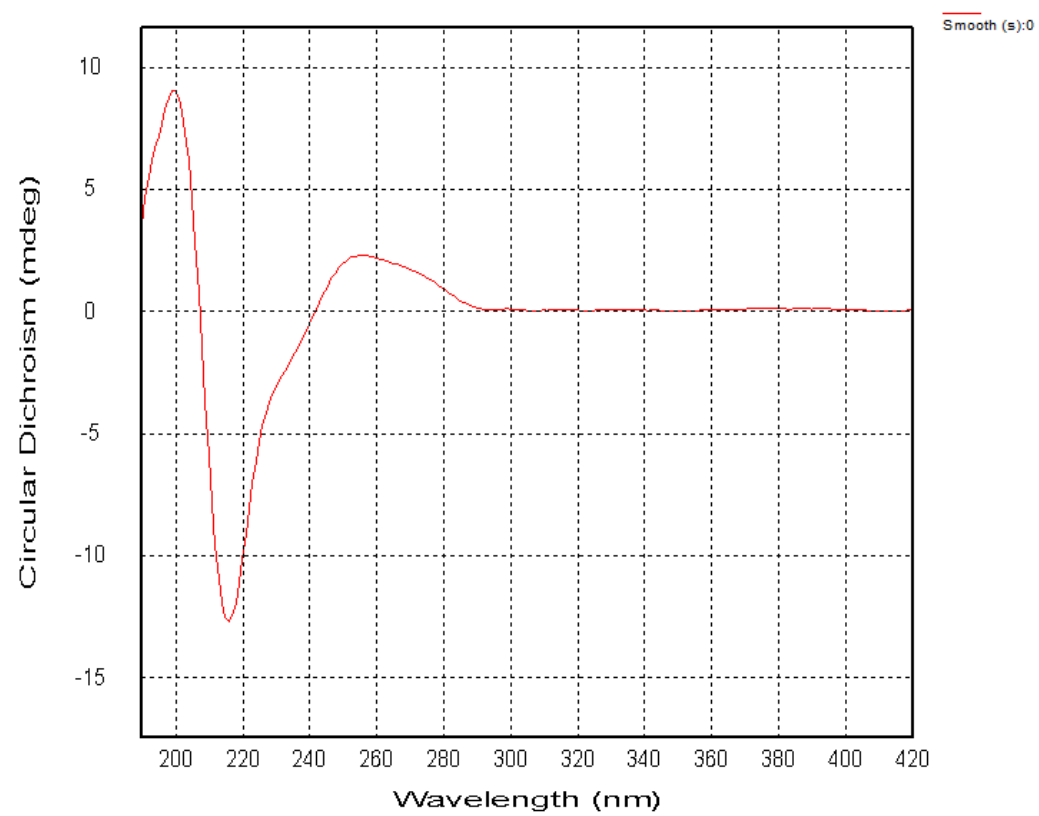

**Figure S32.** CD spectrum of biswulfenioidin C (**3**)

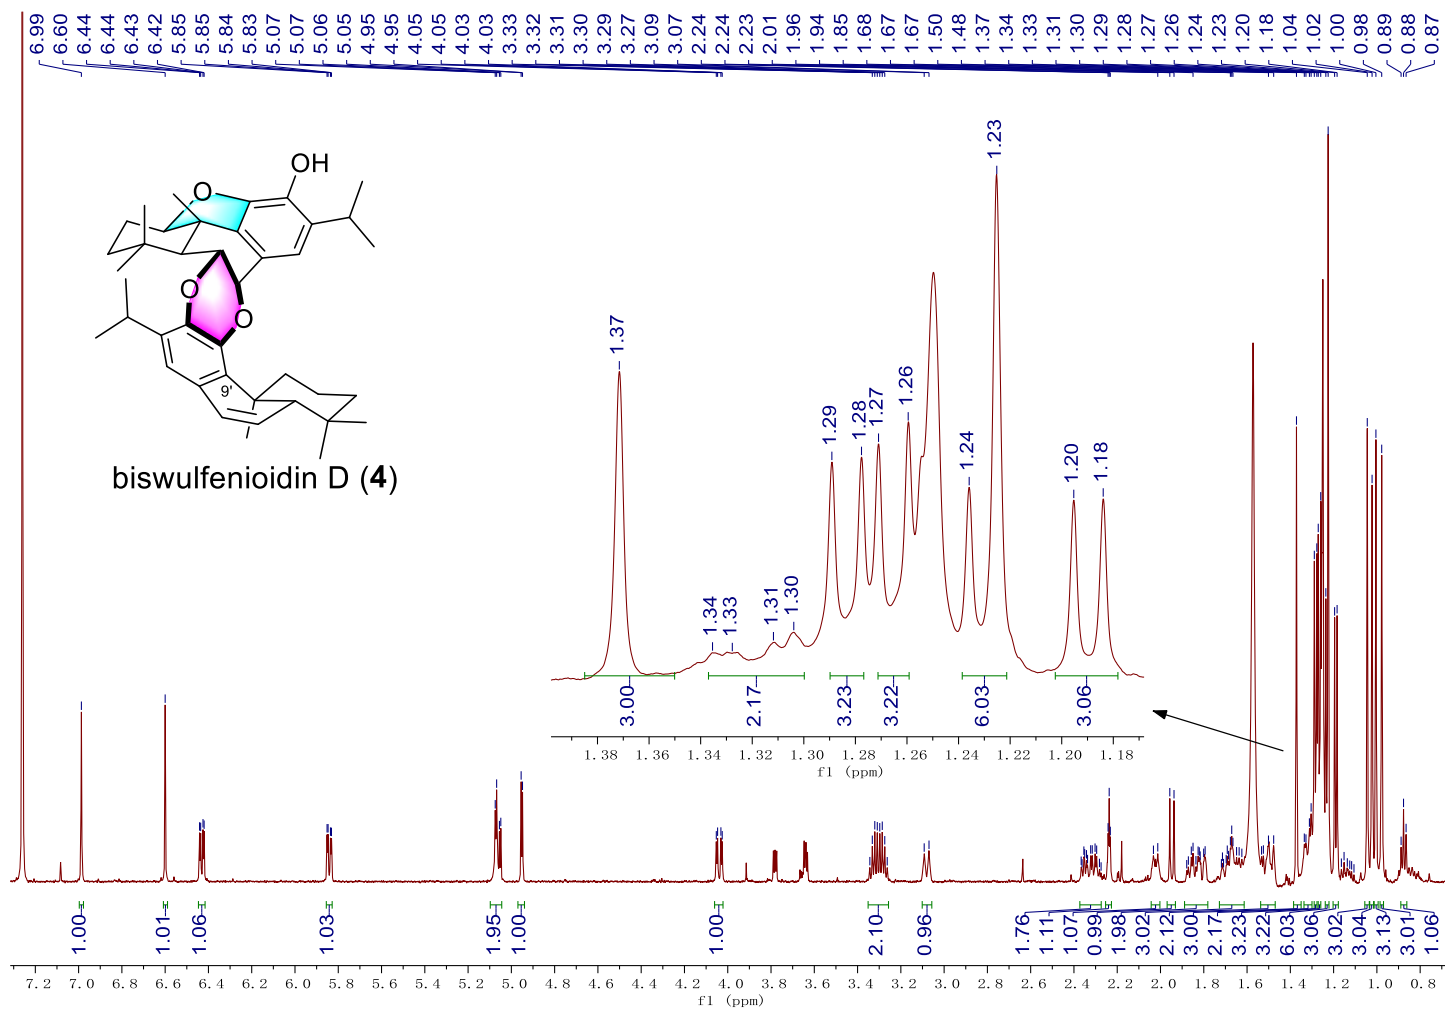



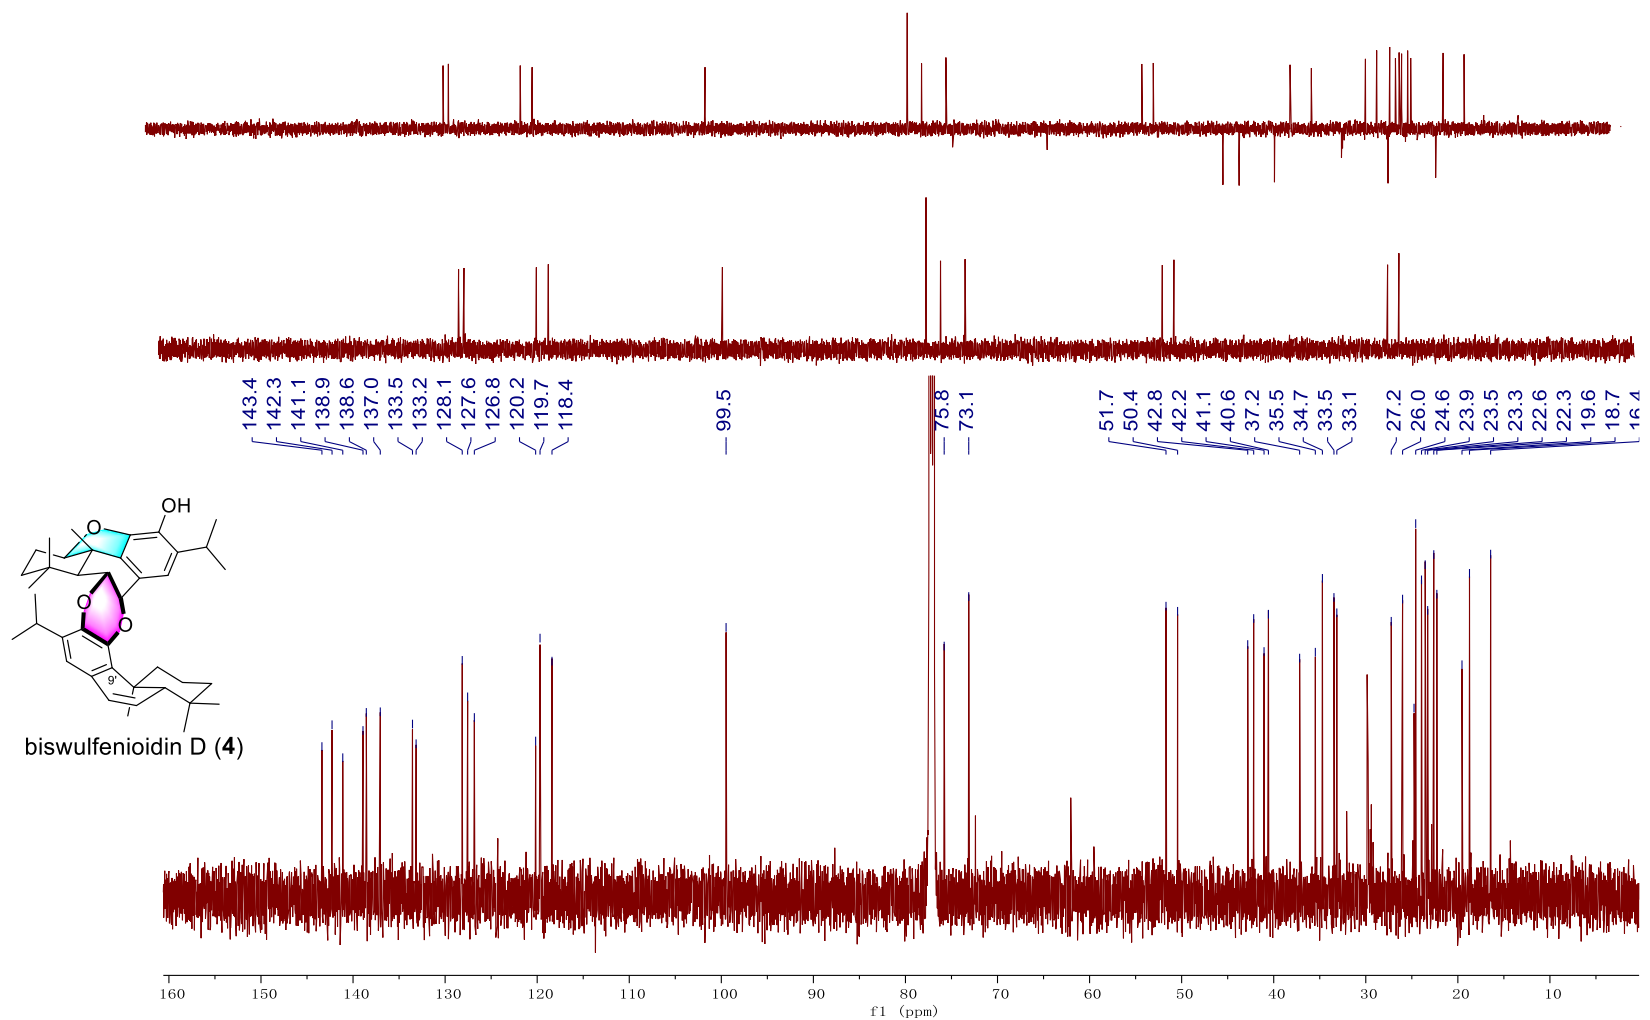

**Figure S34.**  $^{13}\text{C}$  and DEPT NMR spectra of biswulfenioidin D (4) in chloroform (100 MHz)

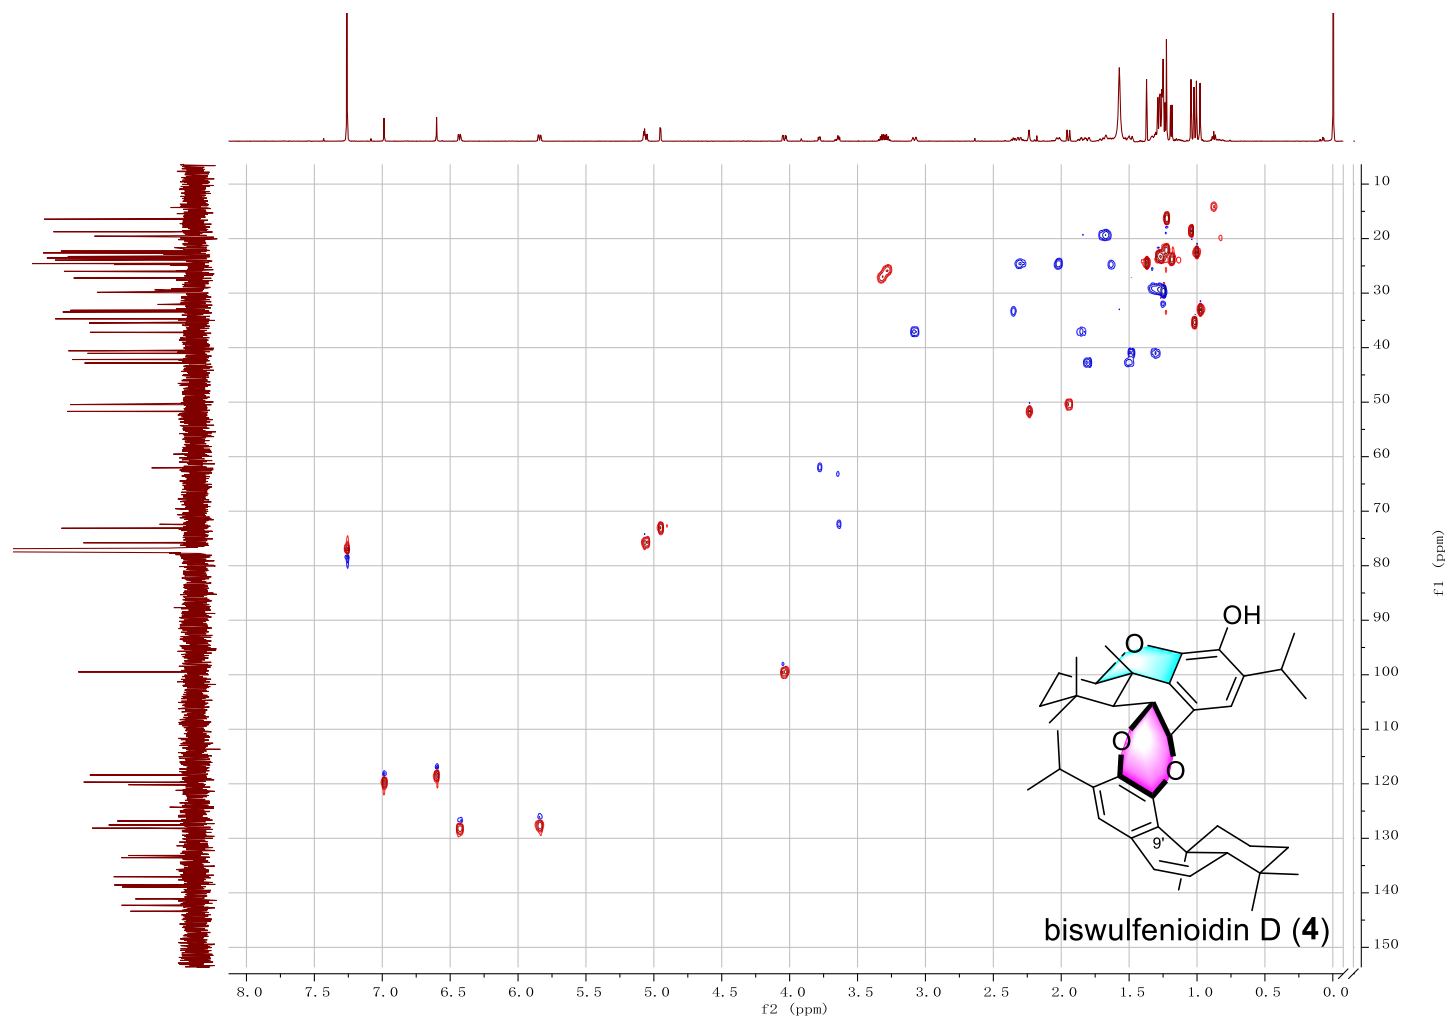

Figure S35. HSQC spectrum of biswulfenioidin D (4) in chloroform (600 MHz)

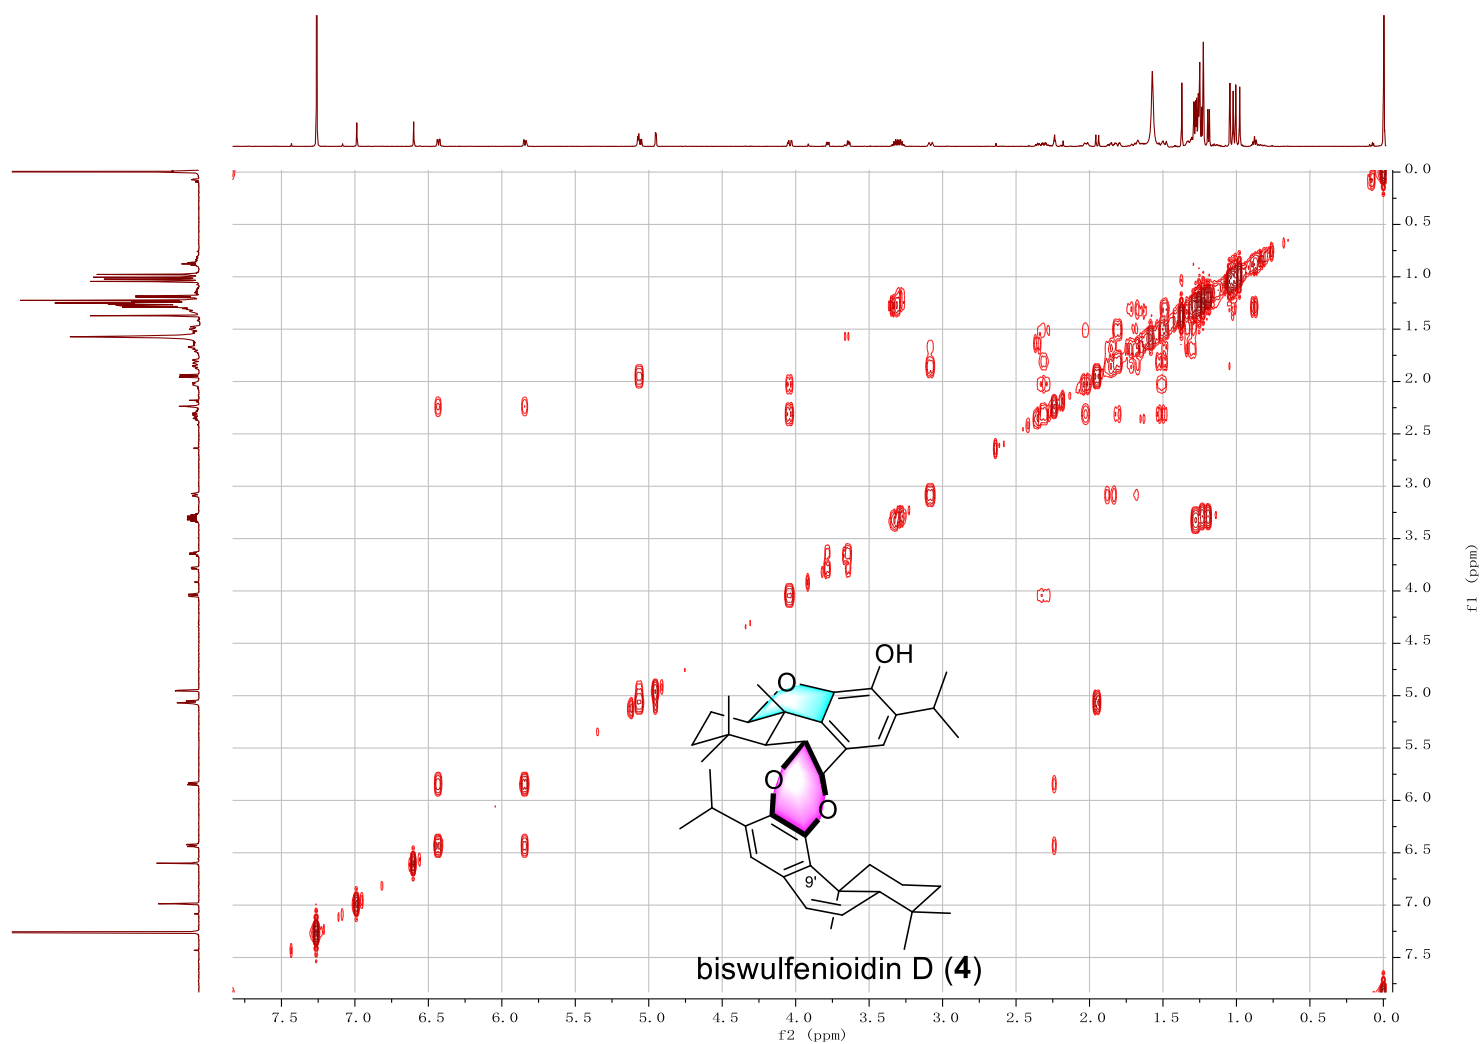

**Figure S36.**  $^1\text{H}$ - $^1\text{H}$  COSY spectrum of biswulfenioidin D (4) in chloroform (600 MHz)

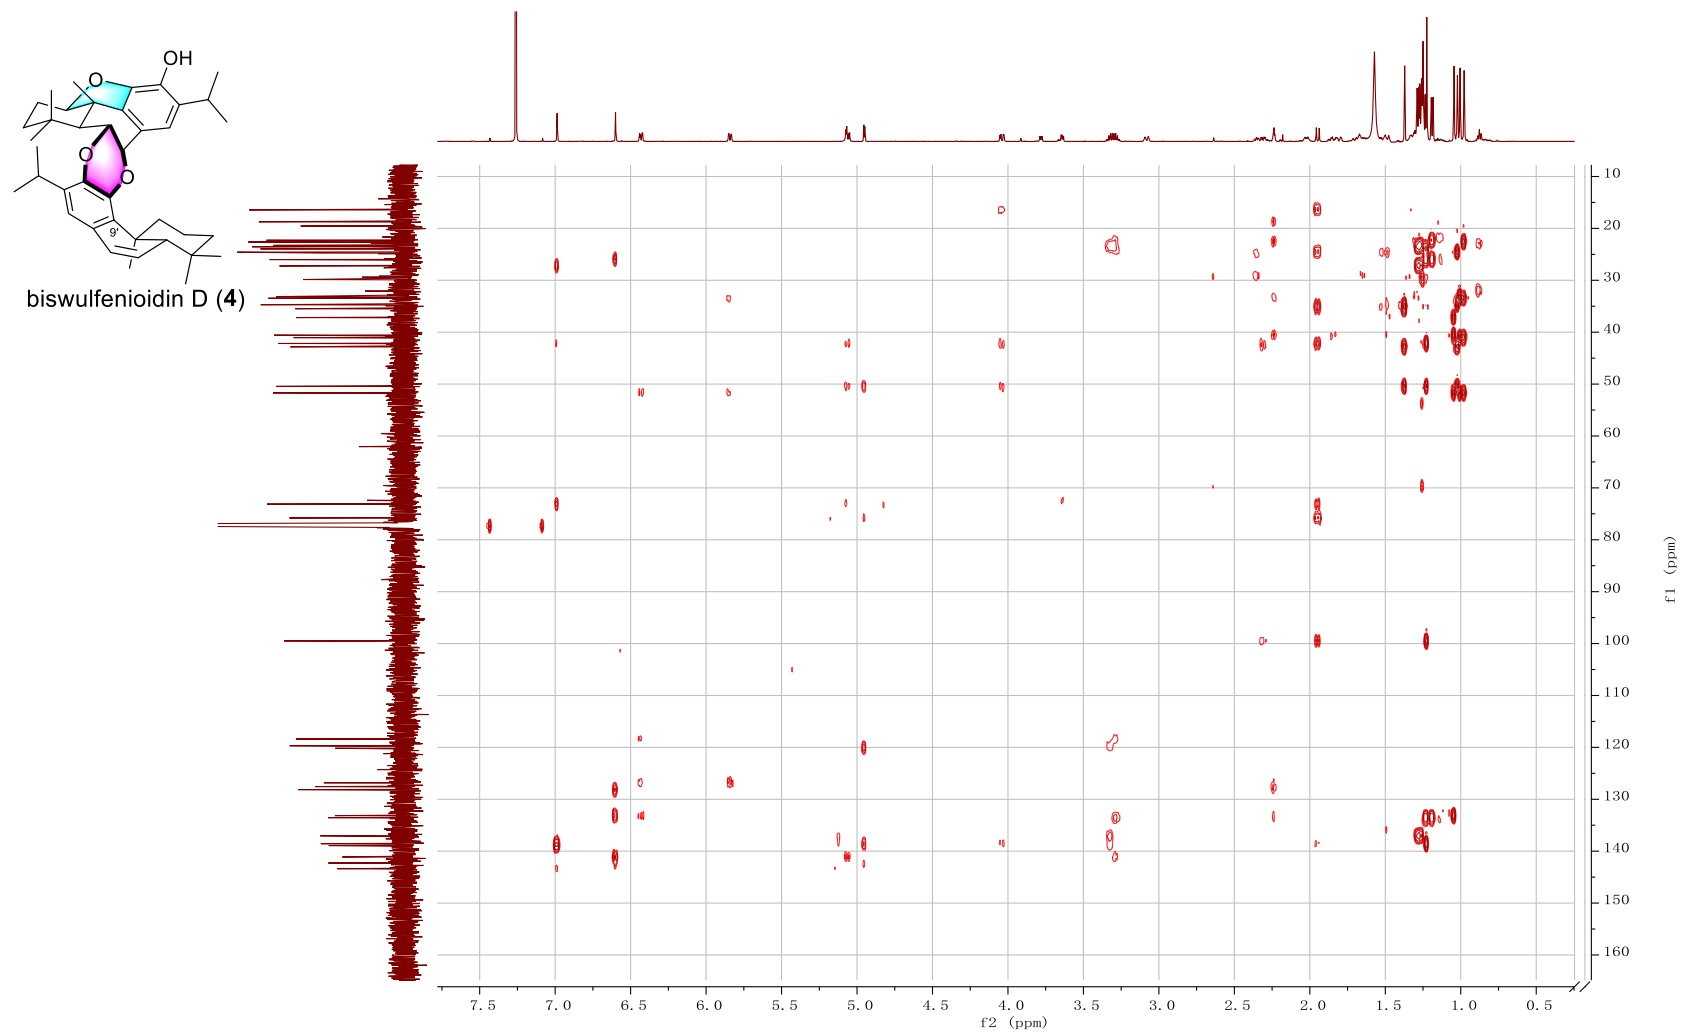

**Figure S37.** HMBC spectrum of biswulfenioidin D (4) in chloroform (600 MHz)

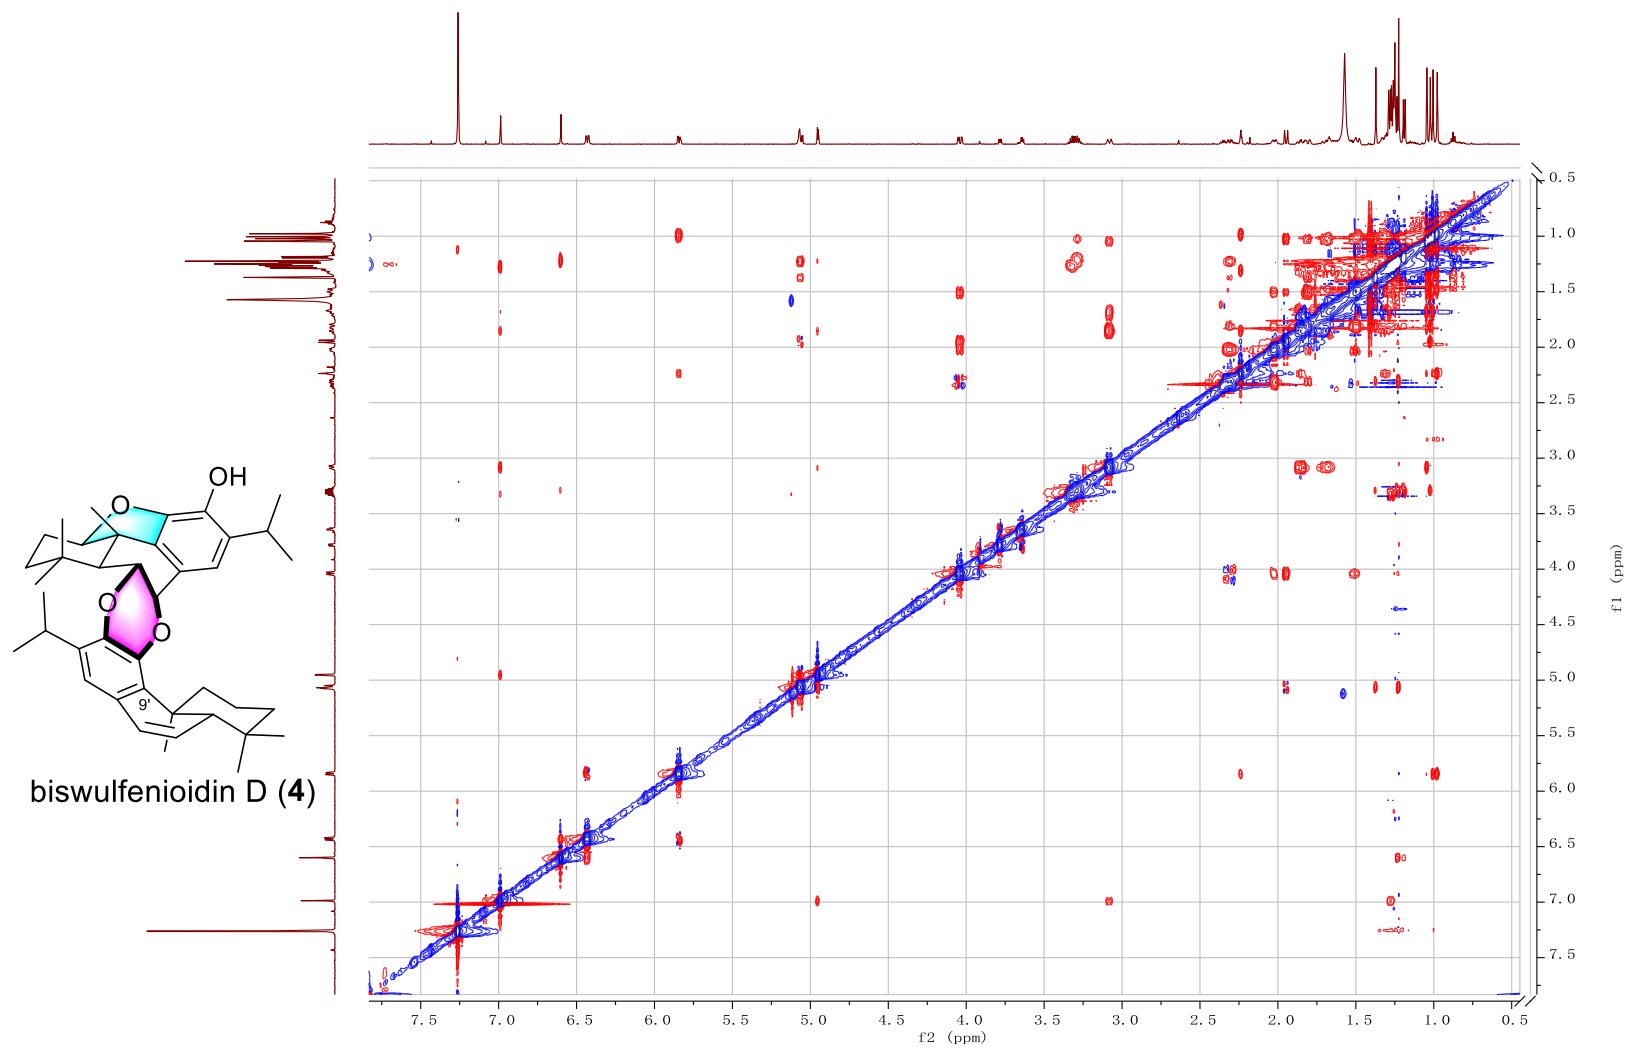

**Figure S38.** ROESY spectrum of biswulfenioidin D (4) in chloroform (600 MHz)

9 #136 RT: 2.50 AV: 1 NL: 7.04E6  
T: FTMS + c ESI Full ms [100.00-700.00]

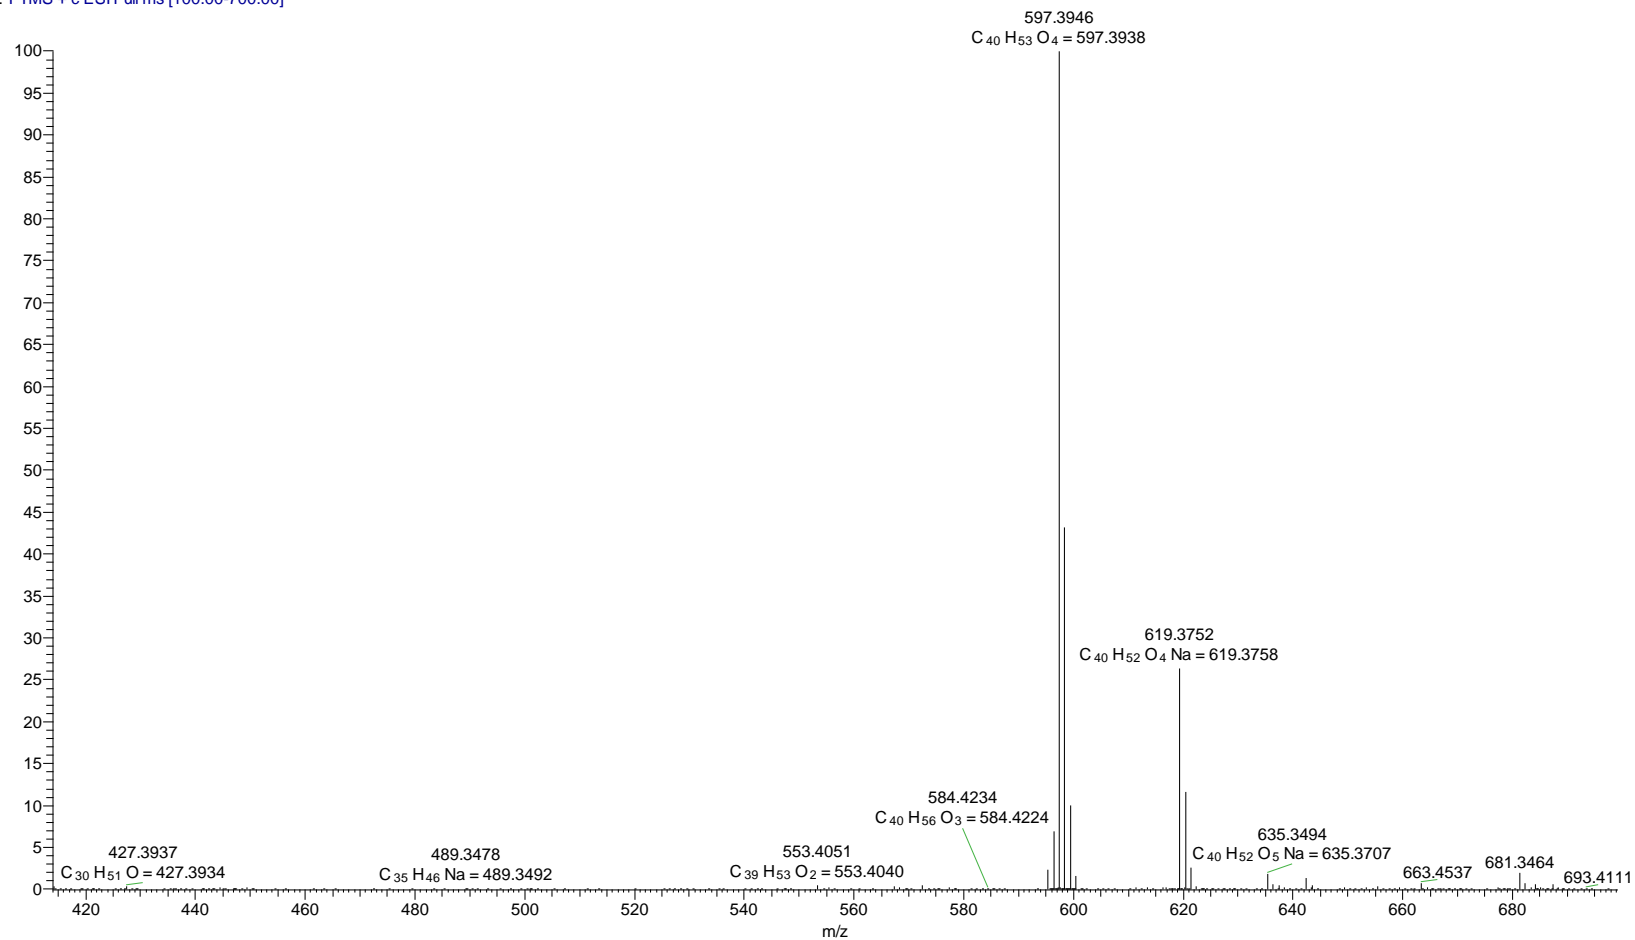

Figure S39. HRESIMS spectrum of biswulfenioidin D (4)

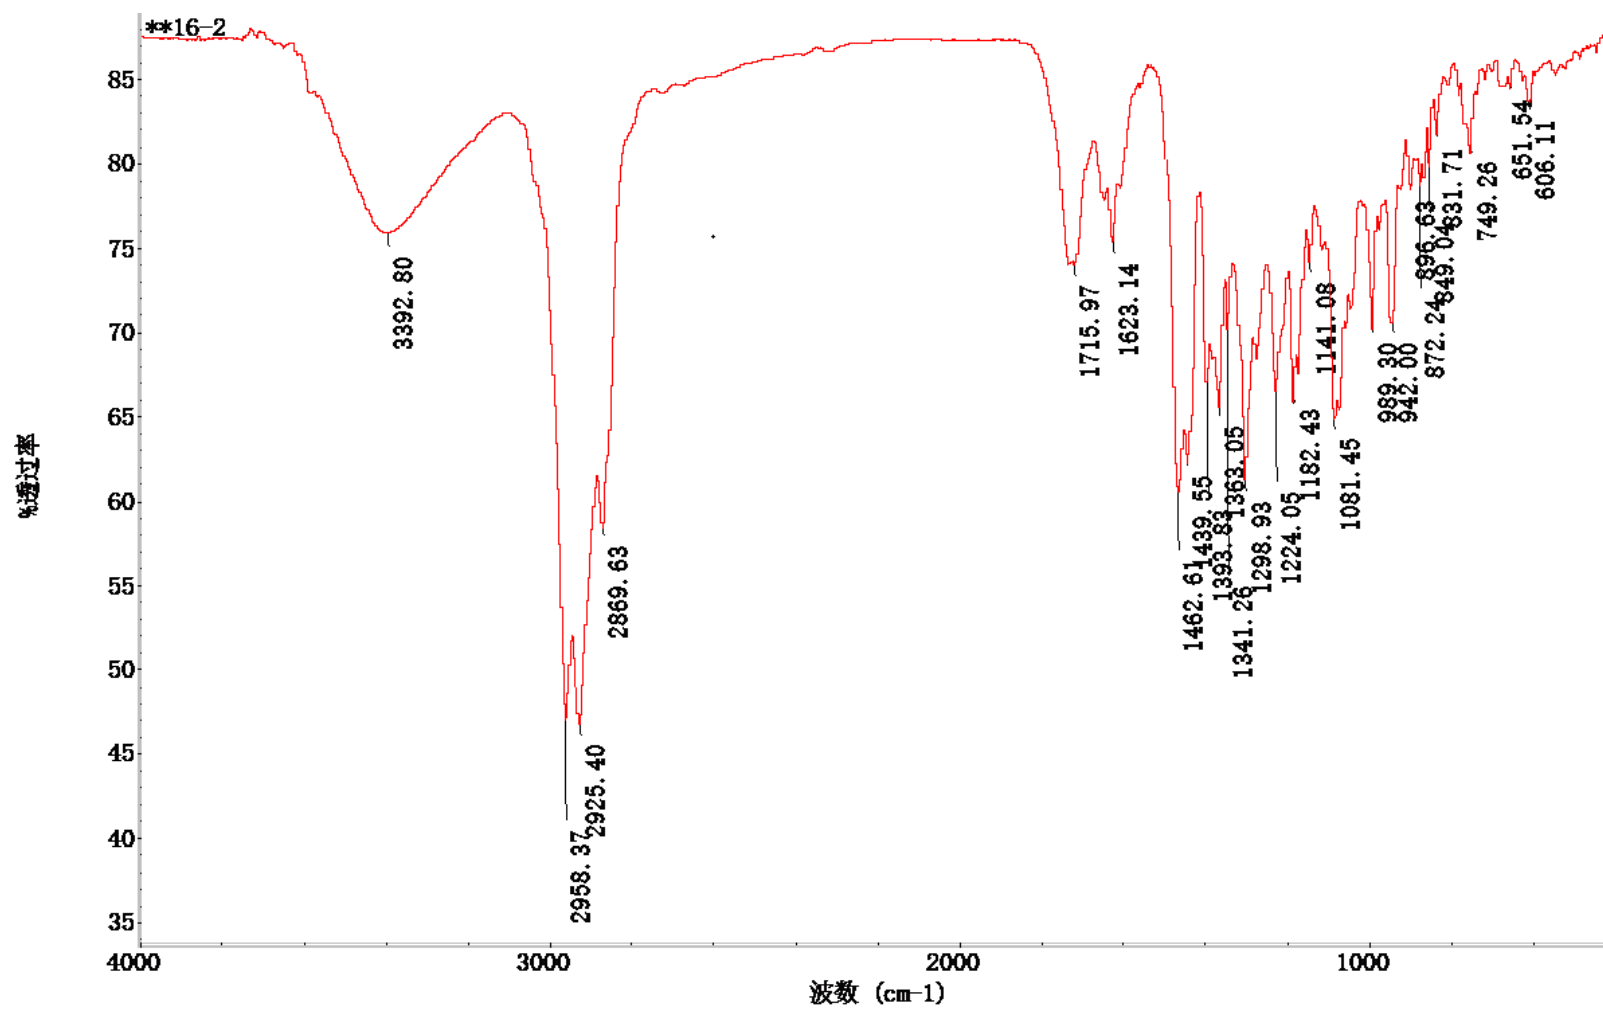

Figure S40. IR spectrum of biswulfenioidin D (4)

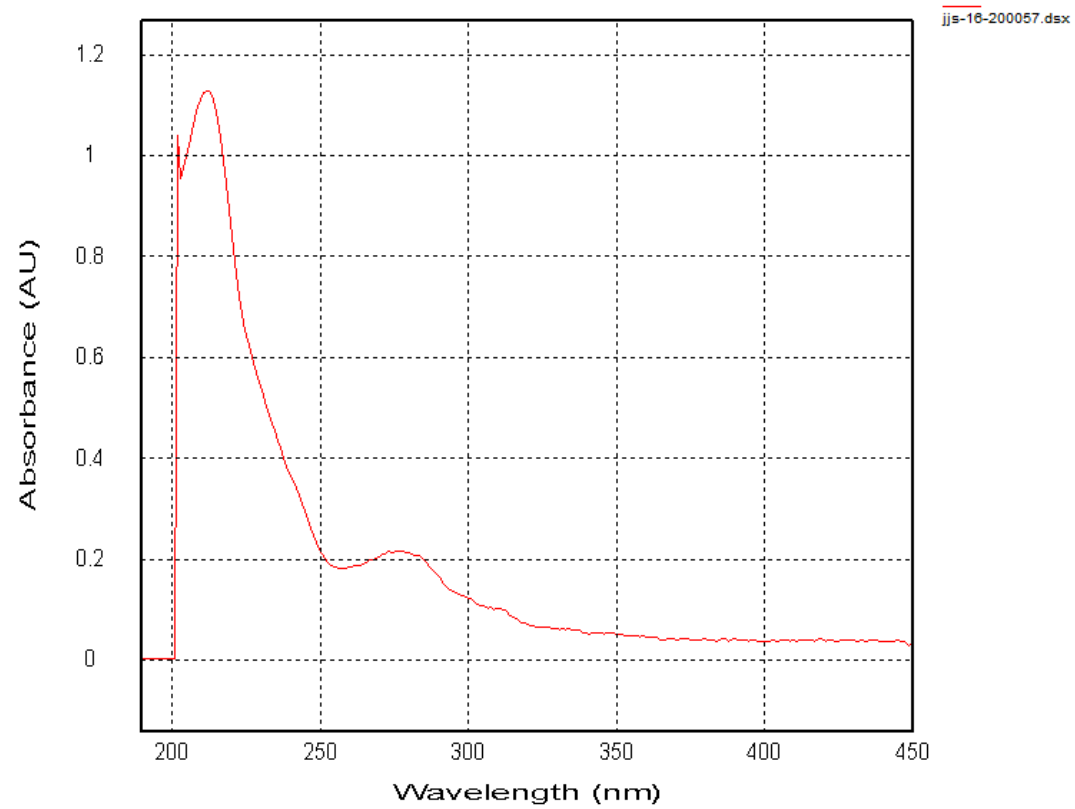

**Figure S41.** UV spectrum of biswulfenioidin D (4)



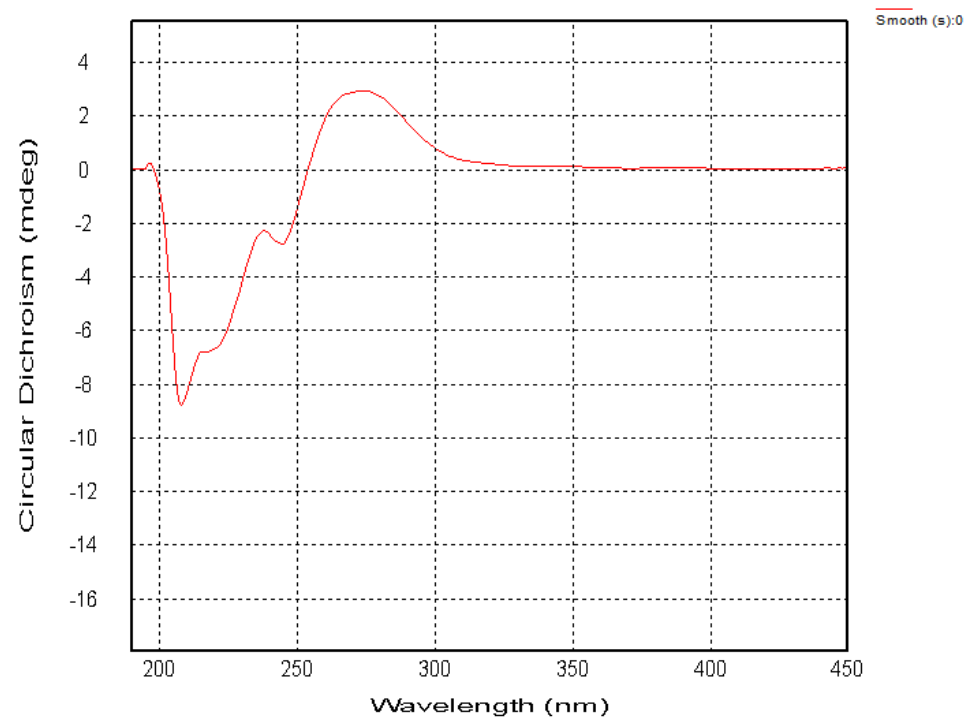

**Figure S42.** CD spectrum of biswulfenioidin D (**4**)

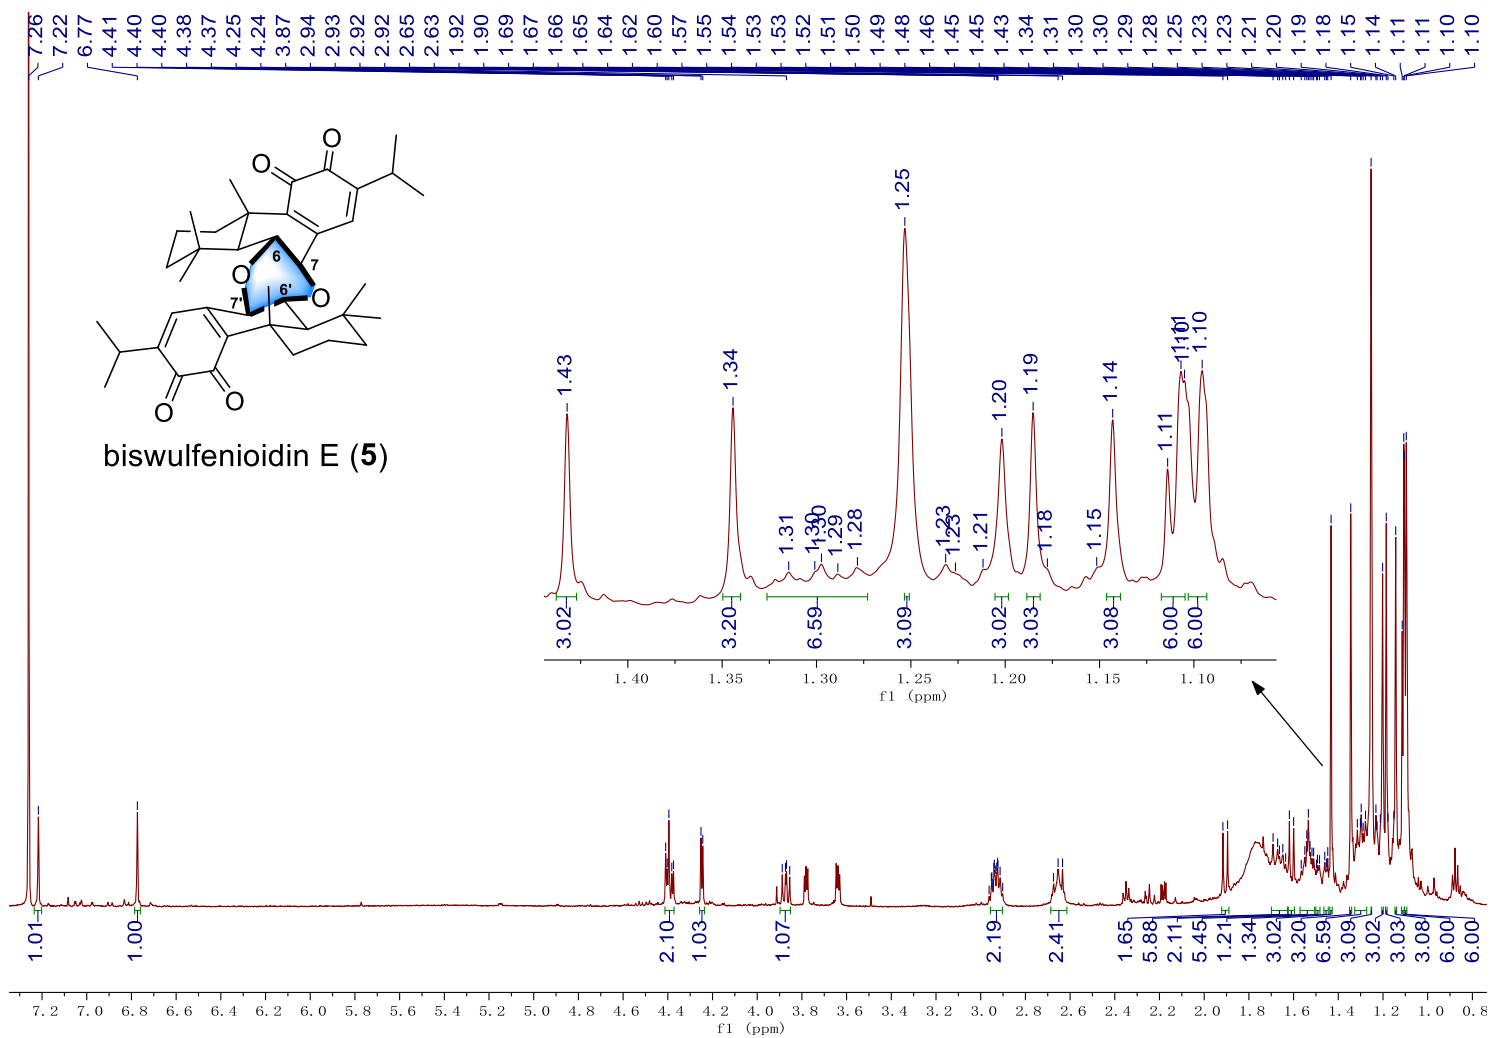

**Figure S43.** <sup>1</sup>H NMR spectrum of biswulfenioidin E (**5**) in chloroform (600 MHz)

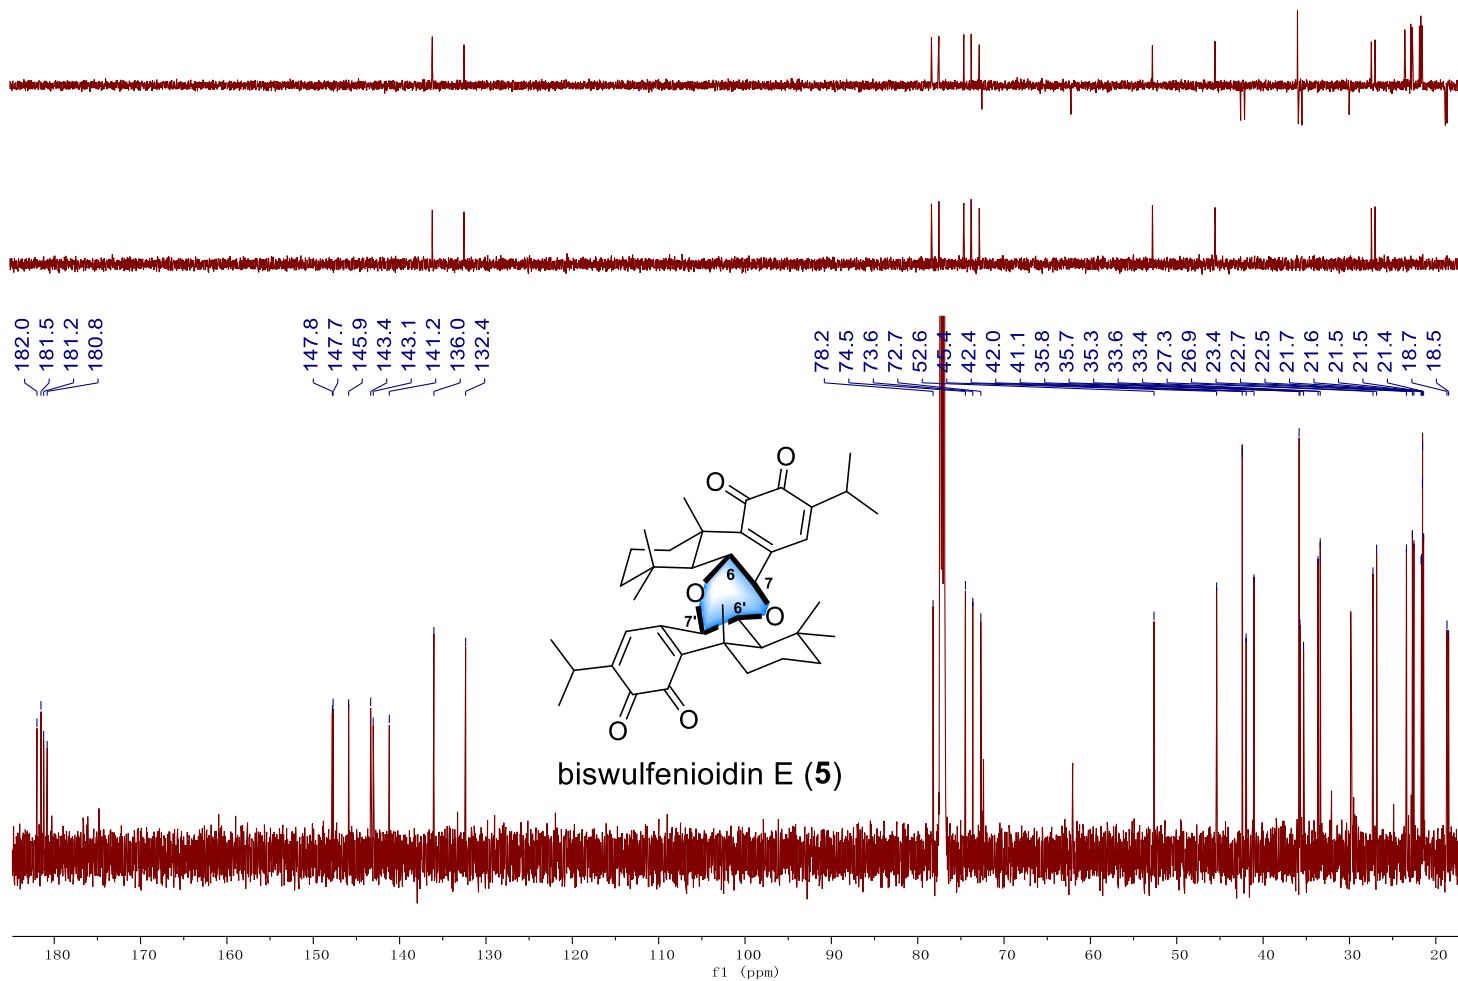

**Figure S44.**  $^{13}\text{C}$  and DEPT NMR spectra of biswulfenioidin E (5) in chloroform (150 MHz)

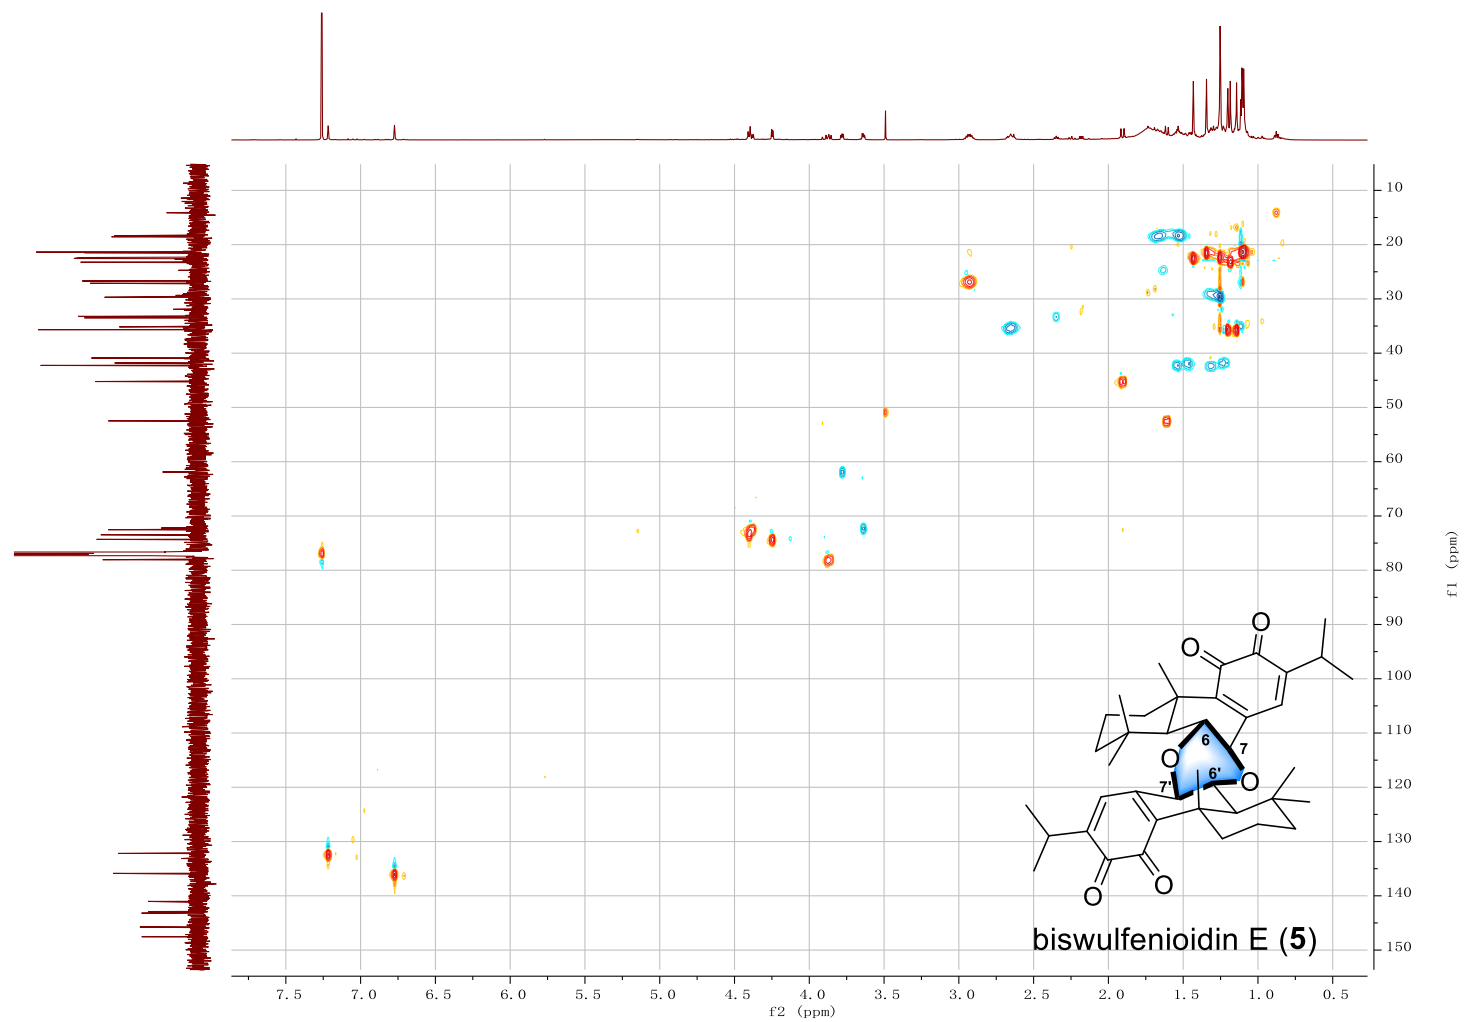

Figure S45. HSQC spectrum of biswulfenioidin E (5) in chloroform (600 MHz)

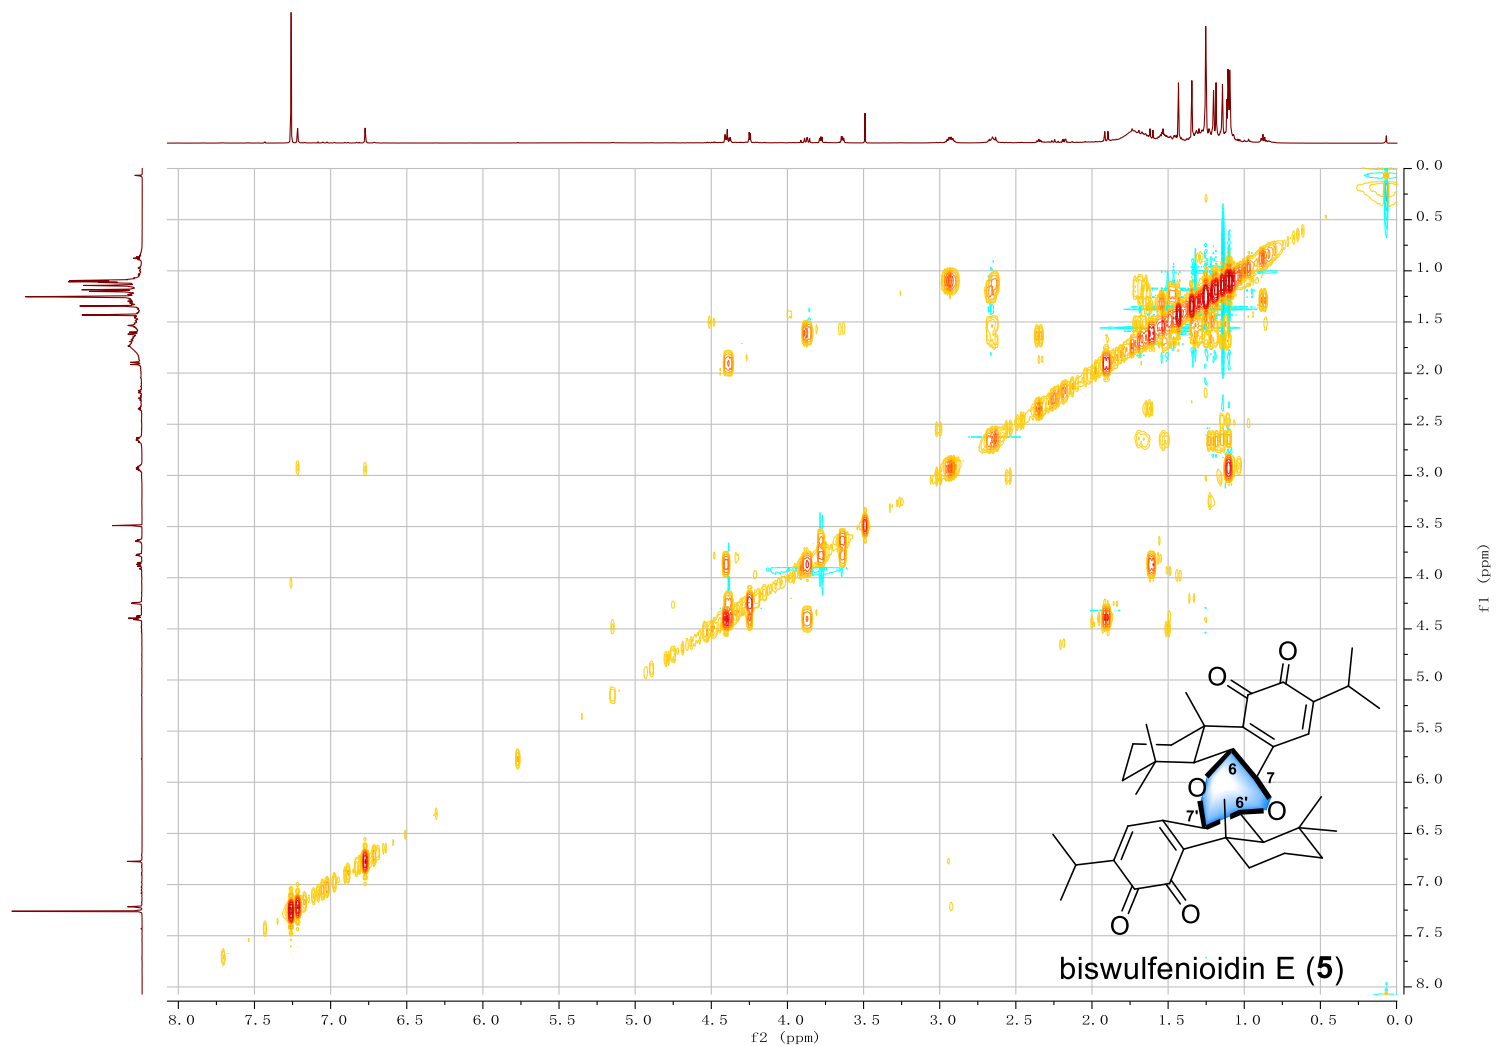

**Figure S46.**  $^1\text{H}$ - $^1\text{H}$  COSY spectrum of biswulfenioidin E (5) in chloroform (600 MHz)

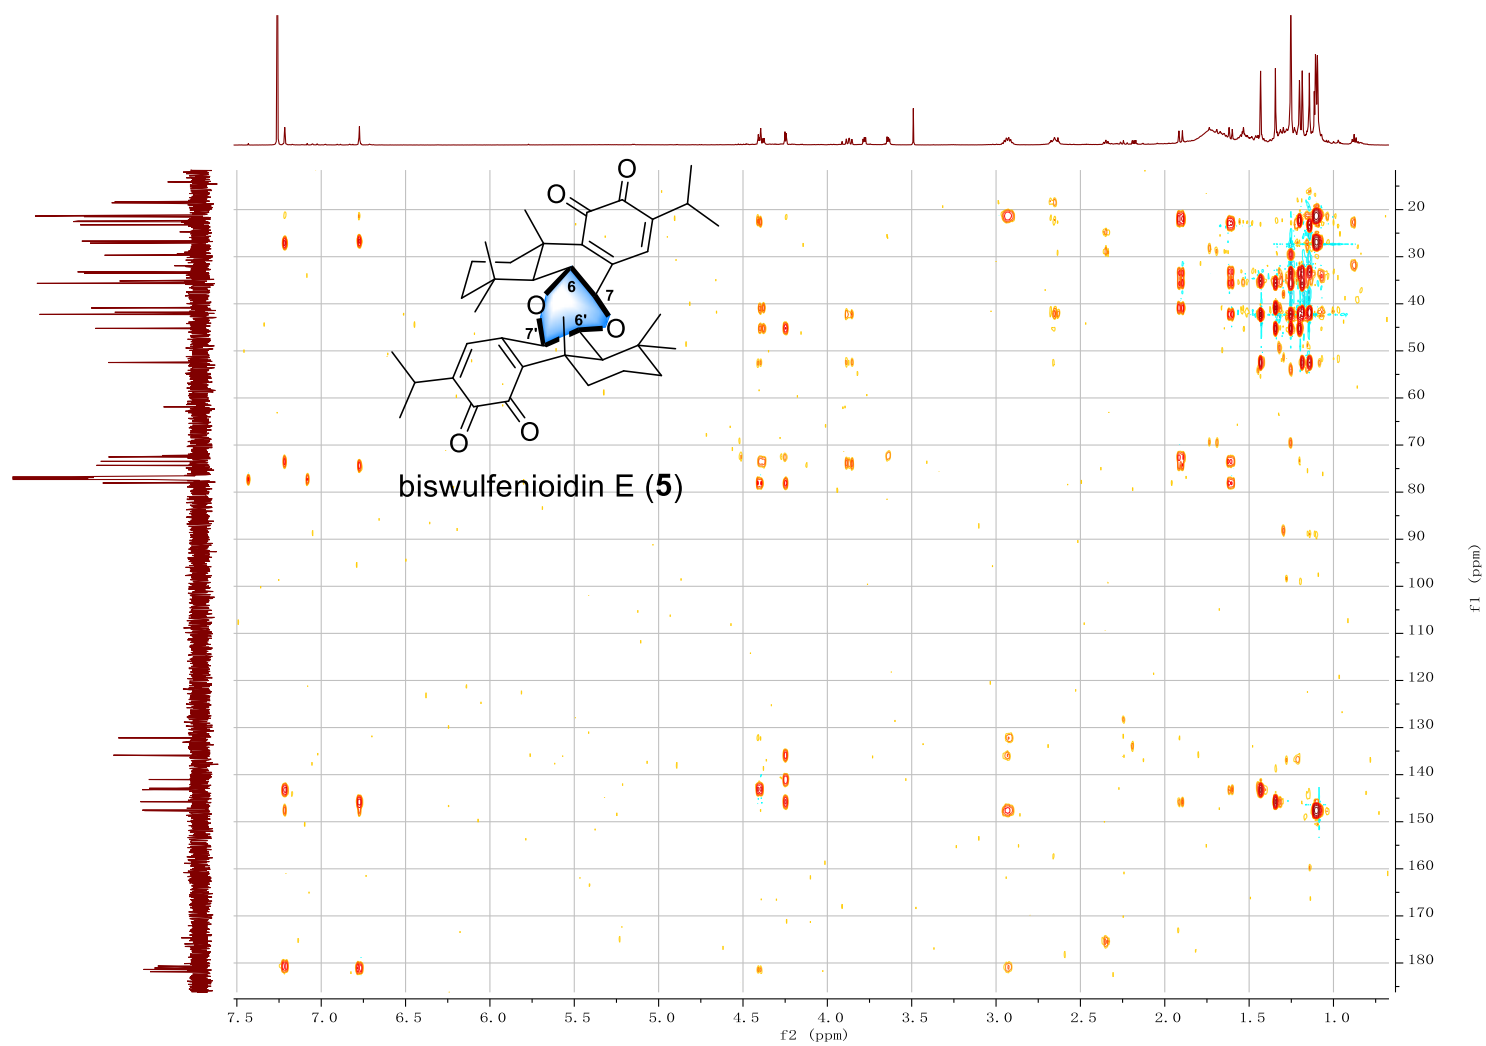

**Figure S47.** HMBC spectrum of biswulfenioidin E (5) in chloroform (600 MHz)

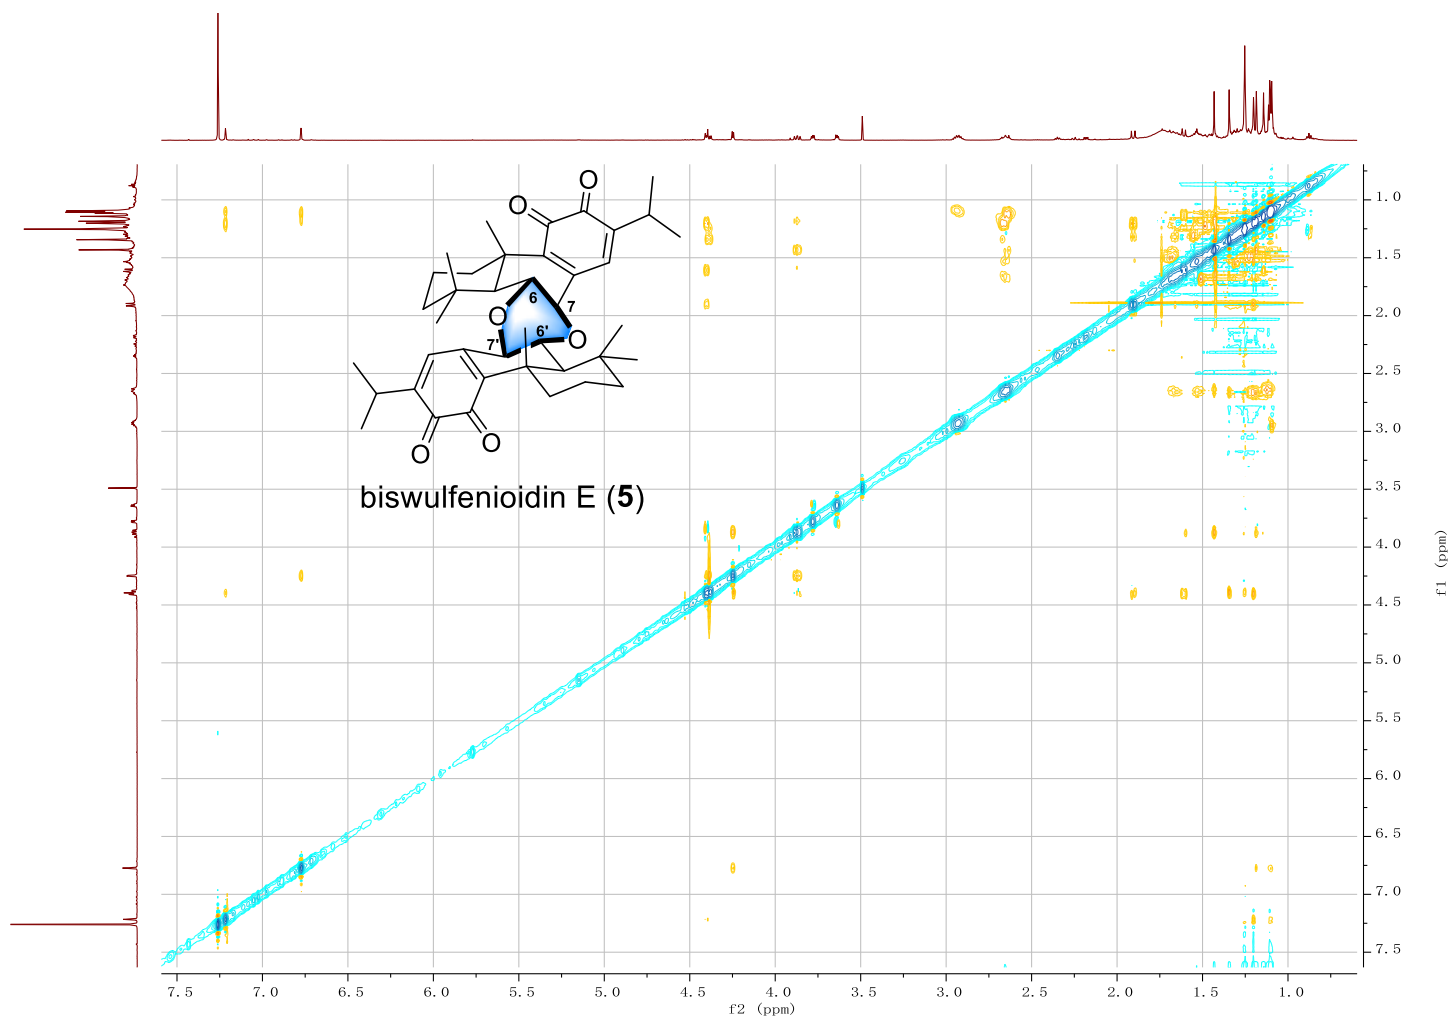

**Figure S48.** ROESY spectrum of biswulfenioidin E (5) in chloroform (600 MHz)

4 #57 RT: 1.15 AV: 1 NL: 1.04E6  
T: FTMS + c ESI Full ms [100.00-800.00]

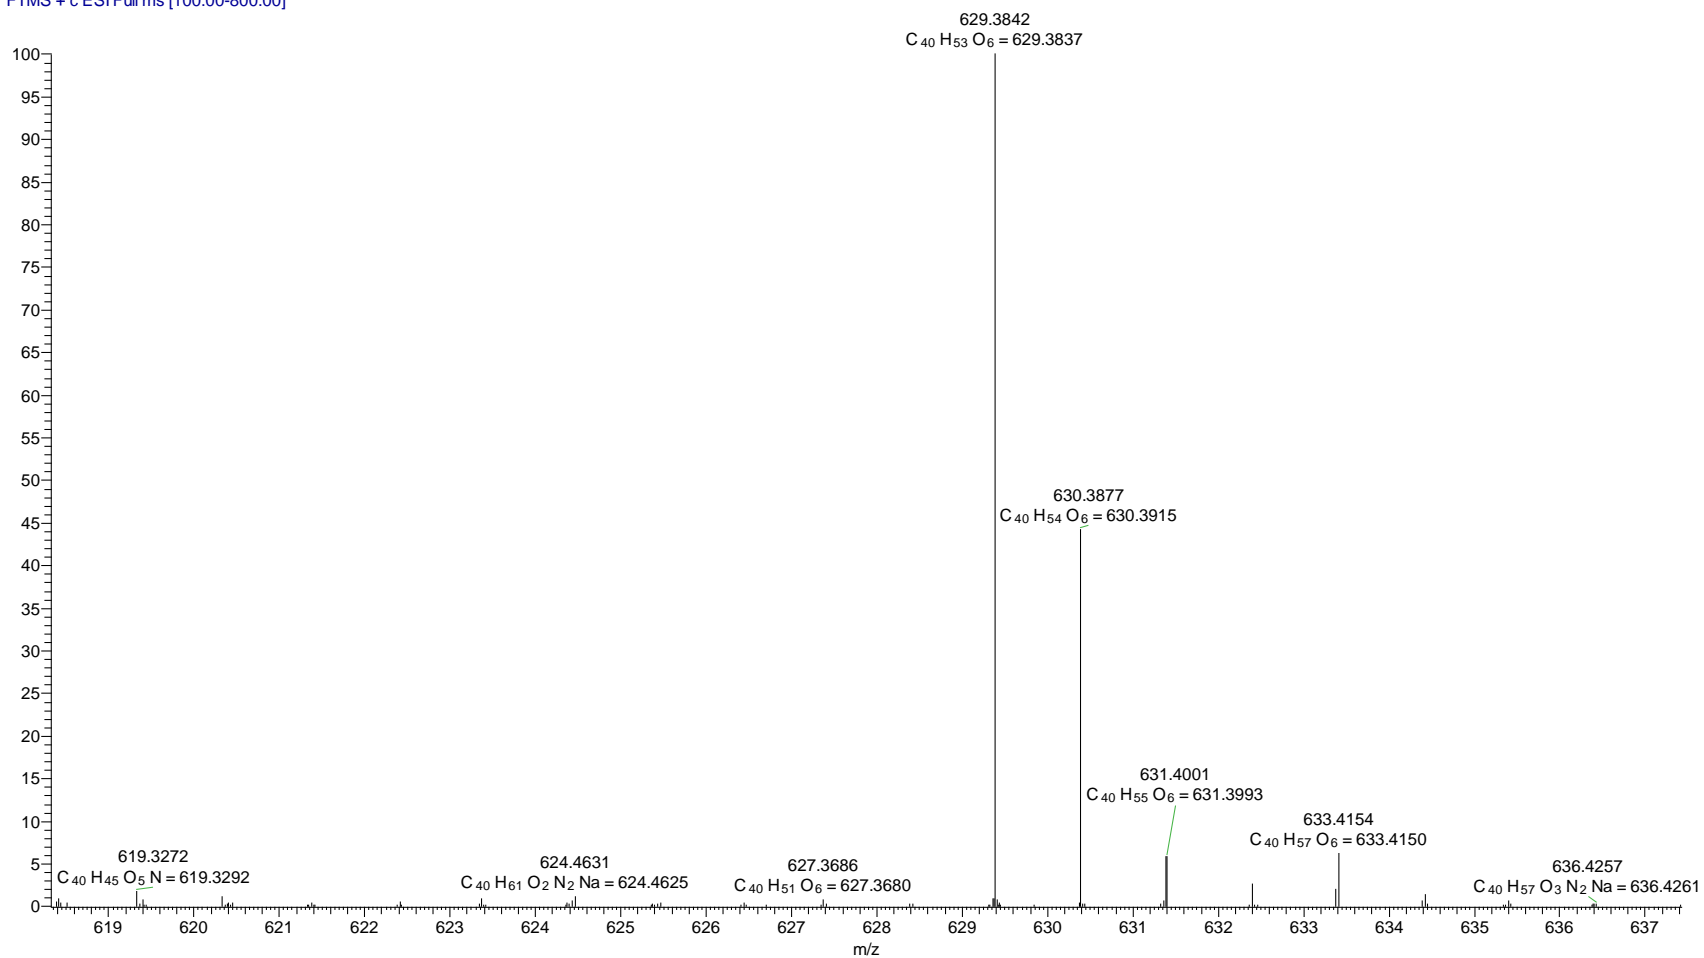

Figure S49. HRESIMS spectrum of biswulfenioidin E (5)



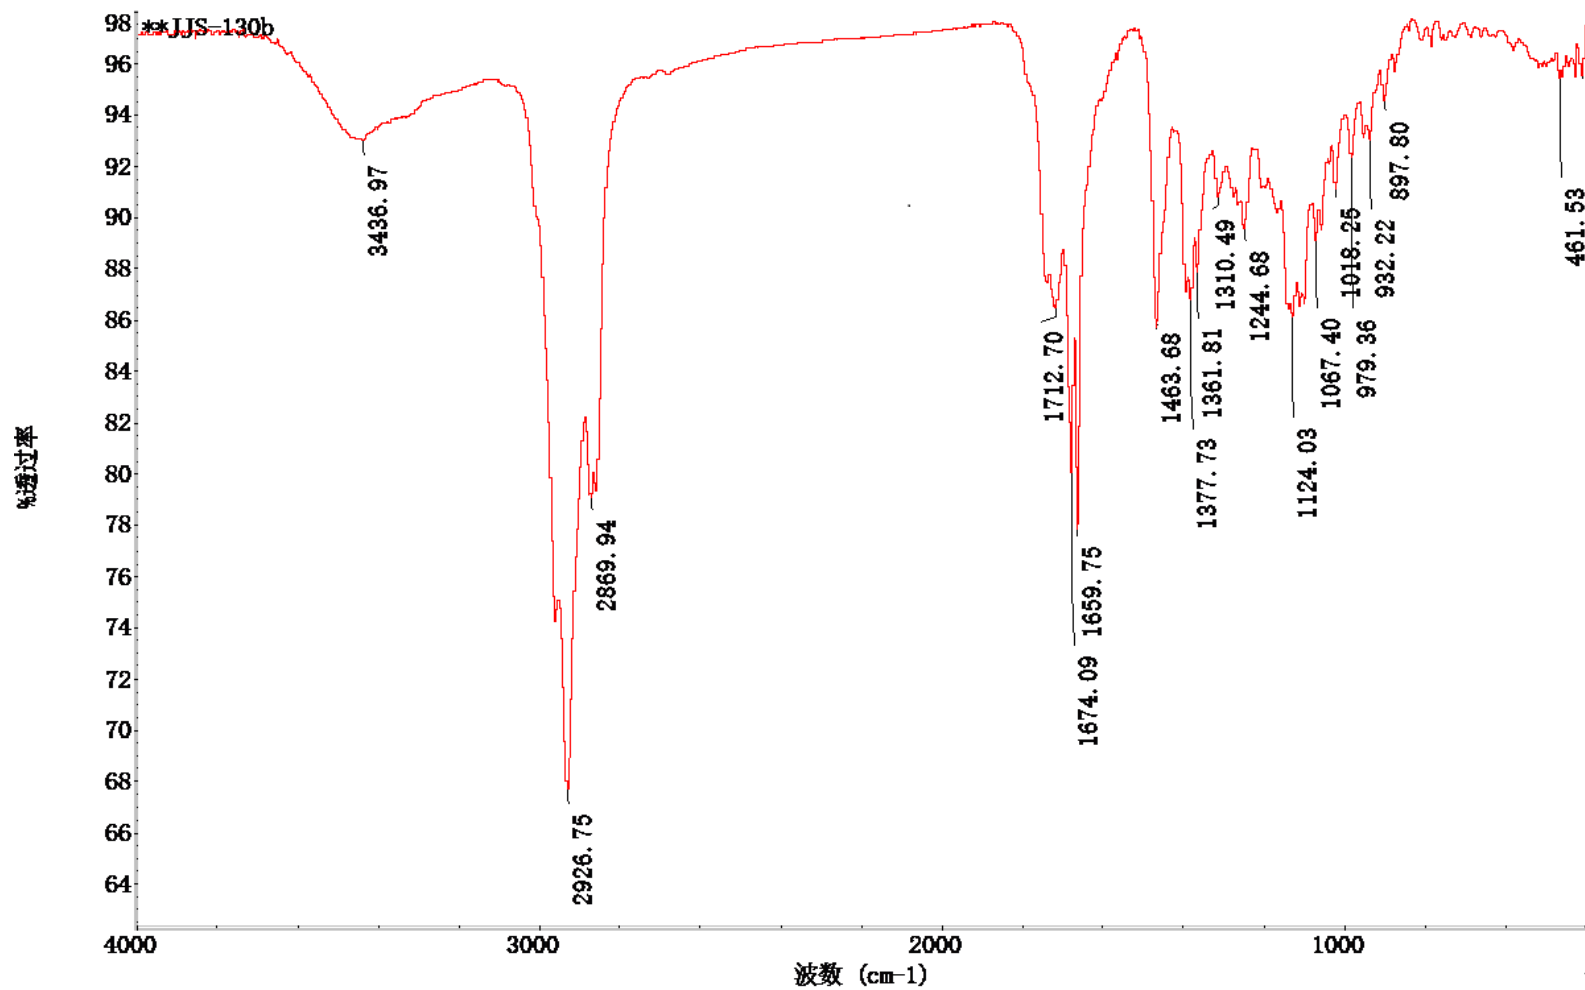

Figure S50. IR spectrum of biswulfenioidin E (5)

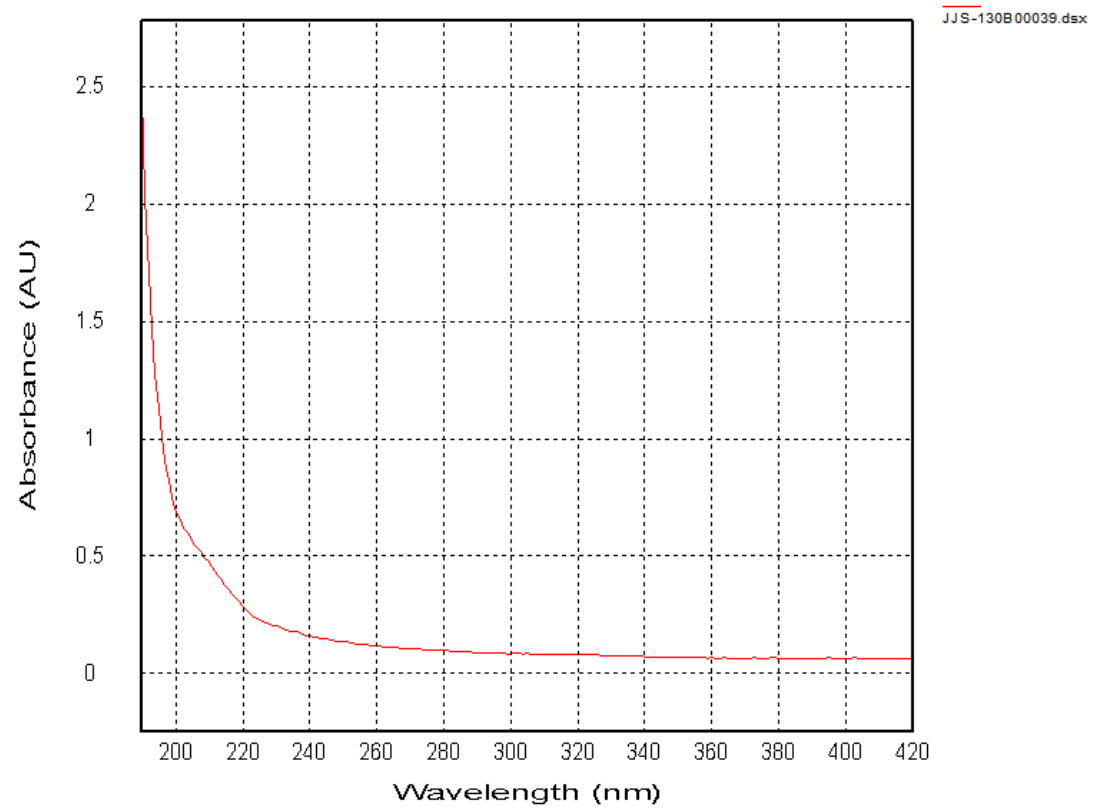

**Figure S51.** UV spectrum of biswulfenoidin E (**5**)

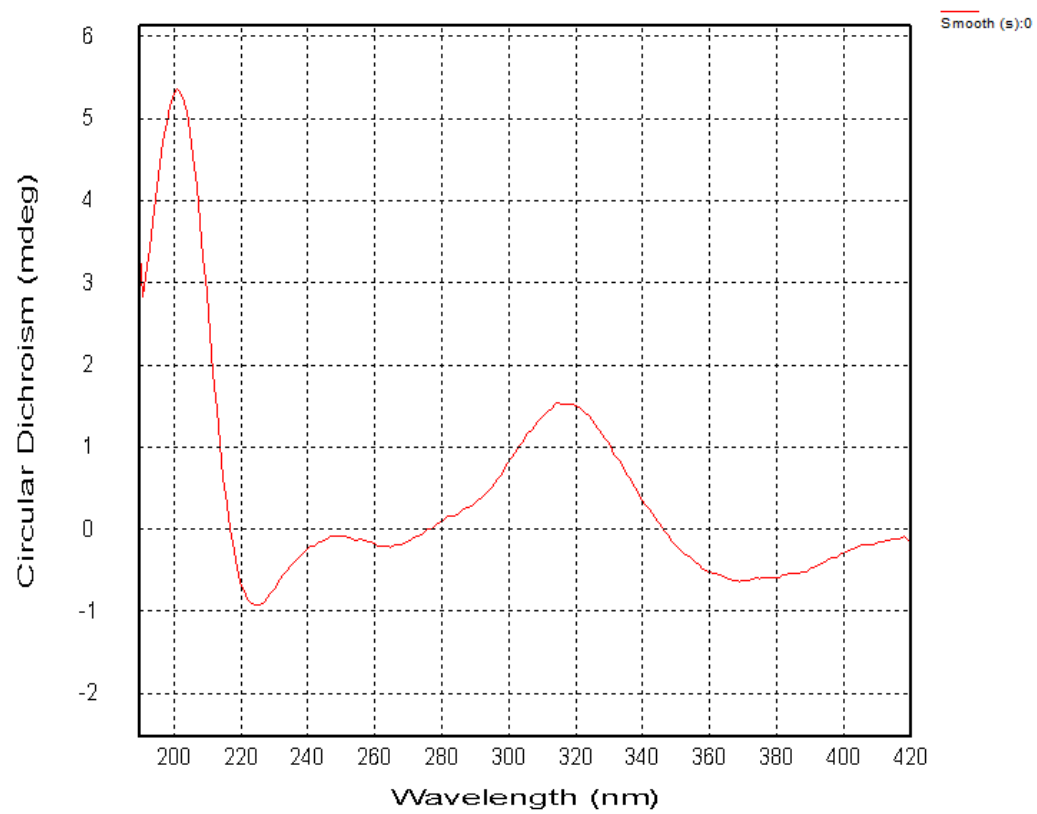

**Figure S52.** CD spectrum of biswulfenioidin E (**5**)

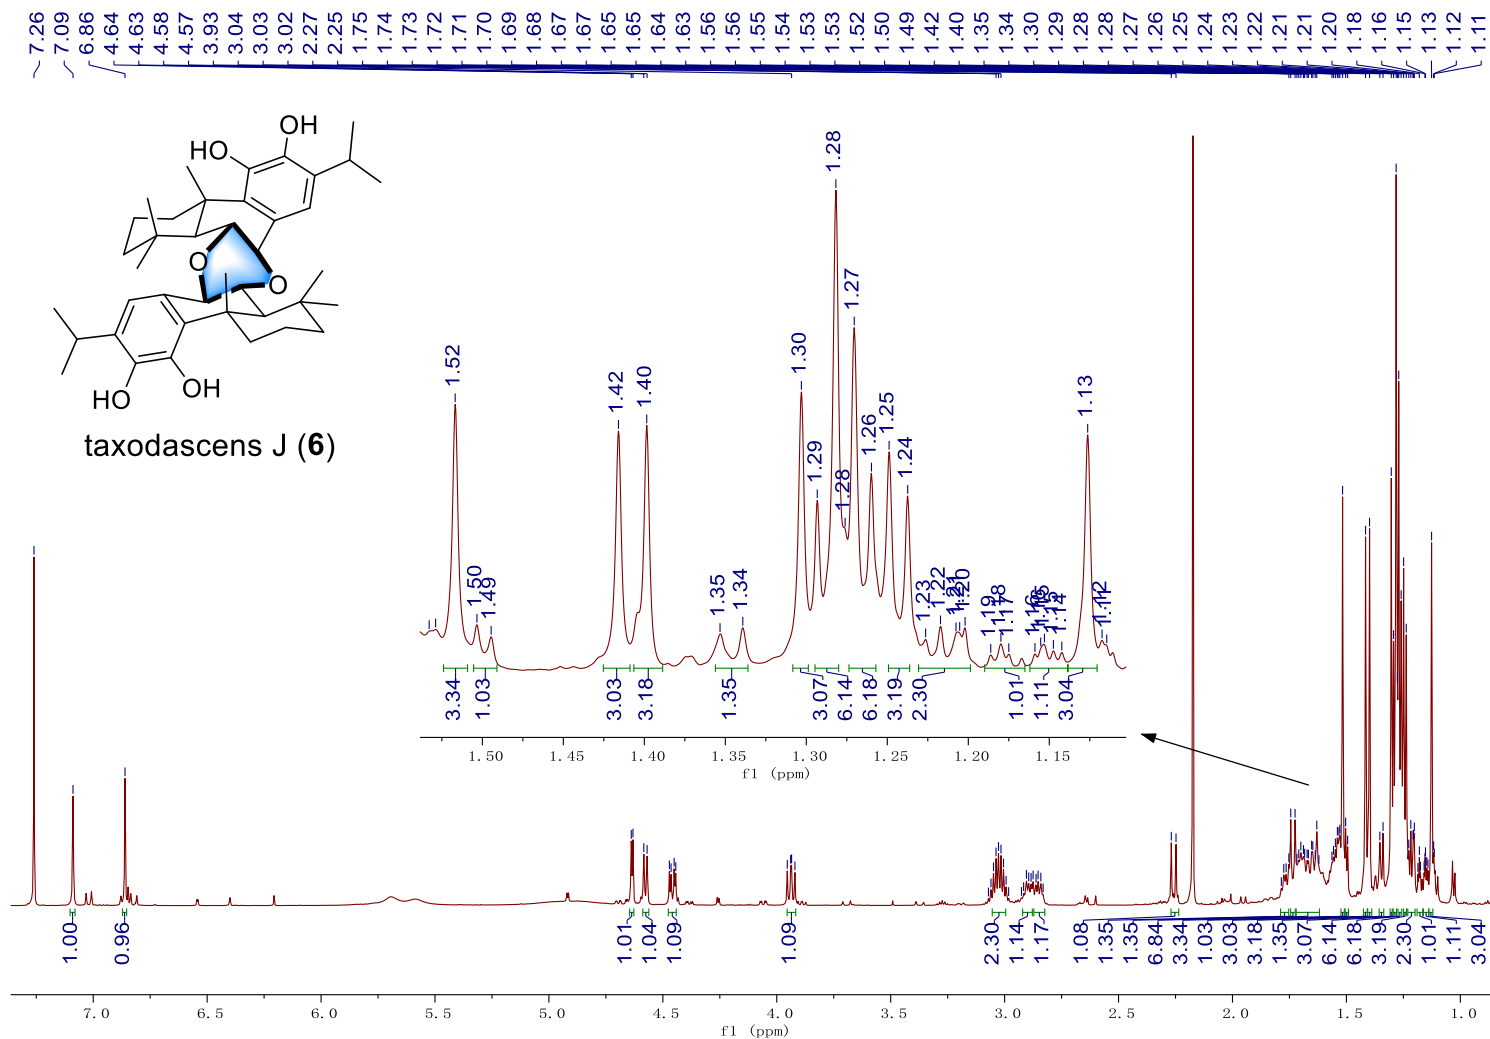

Figure S53. <sup>1</sup>H NMR spectrum of taxodascens J (6) in chloroform (600 MHz)

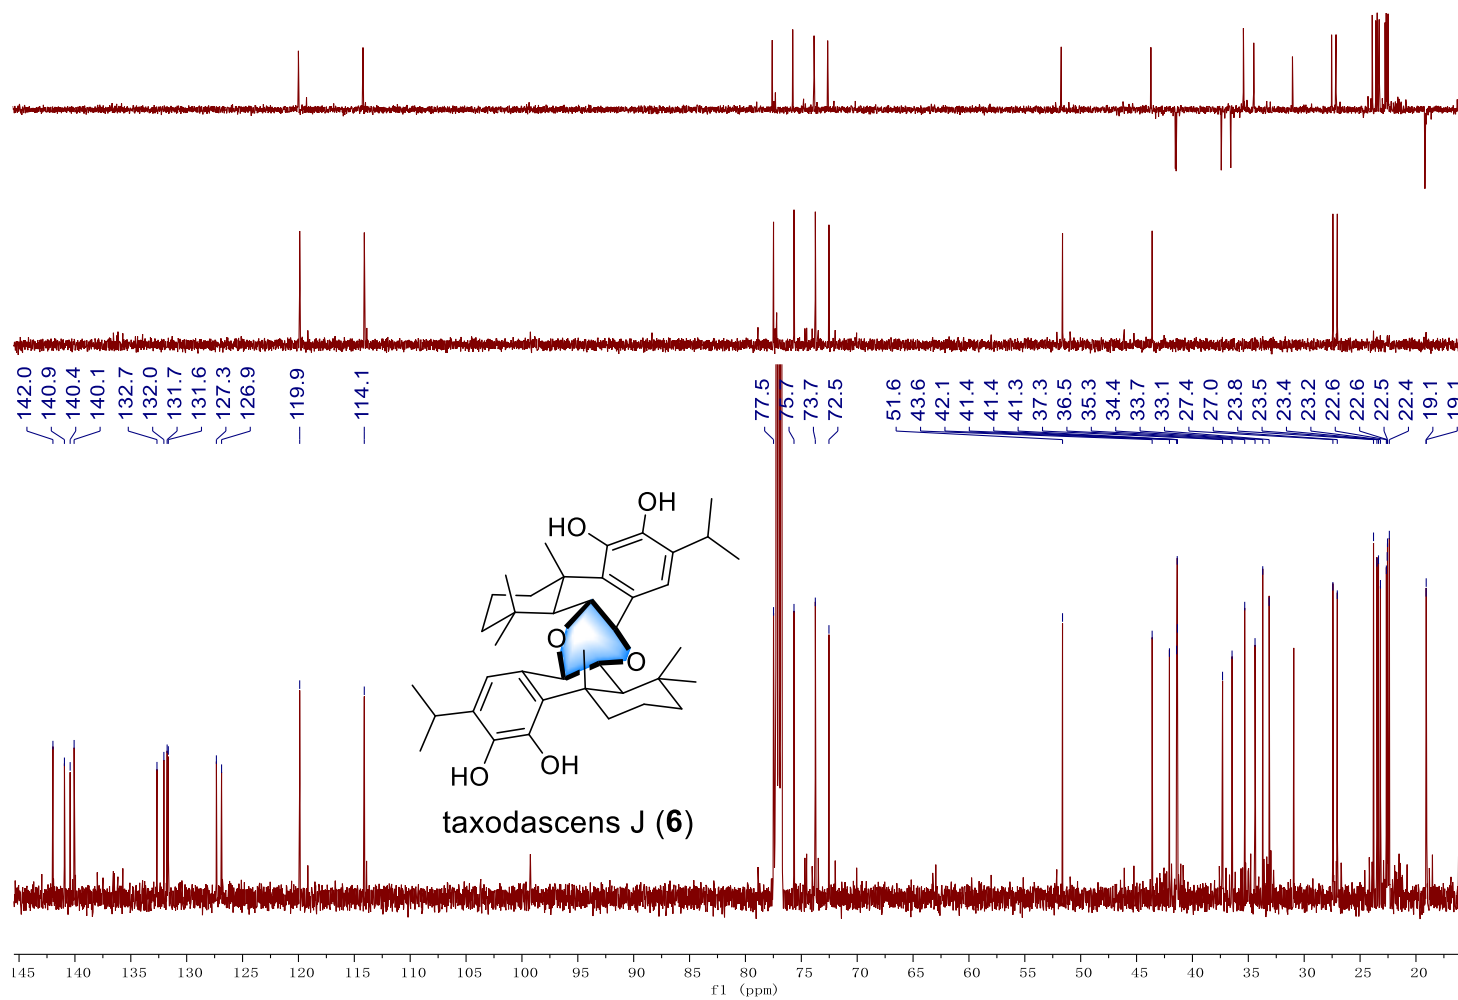

Figure S54. <sup>13</sup>C and DEPT NMR spectra of taxodascens J (6) in chloroform (150 MHz)

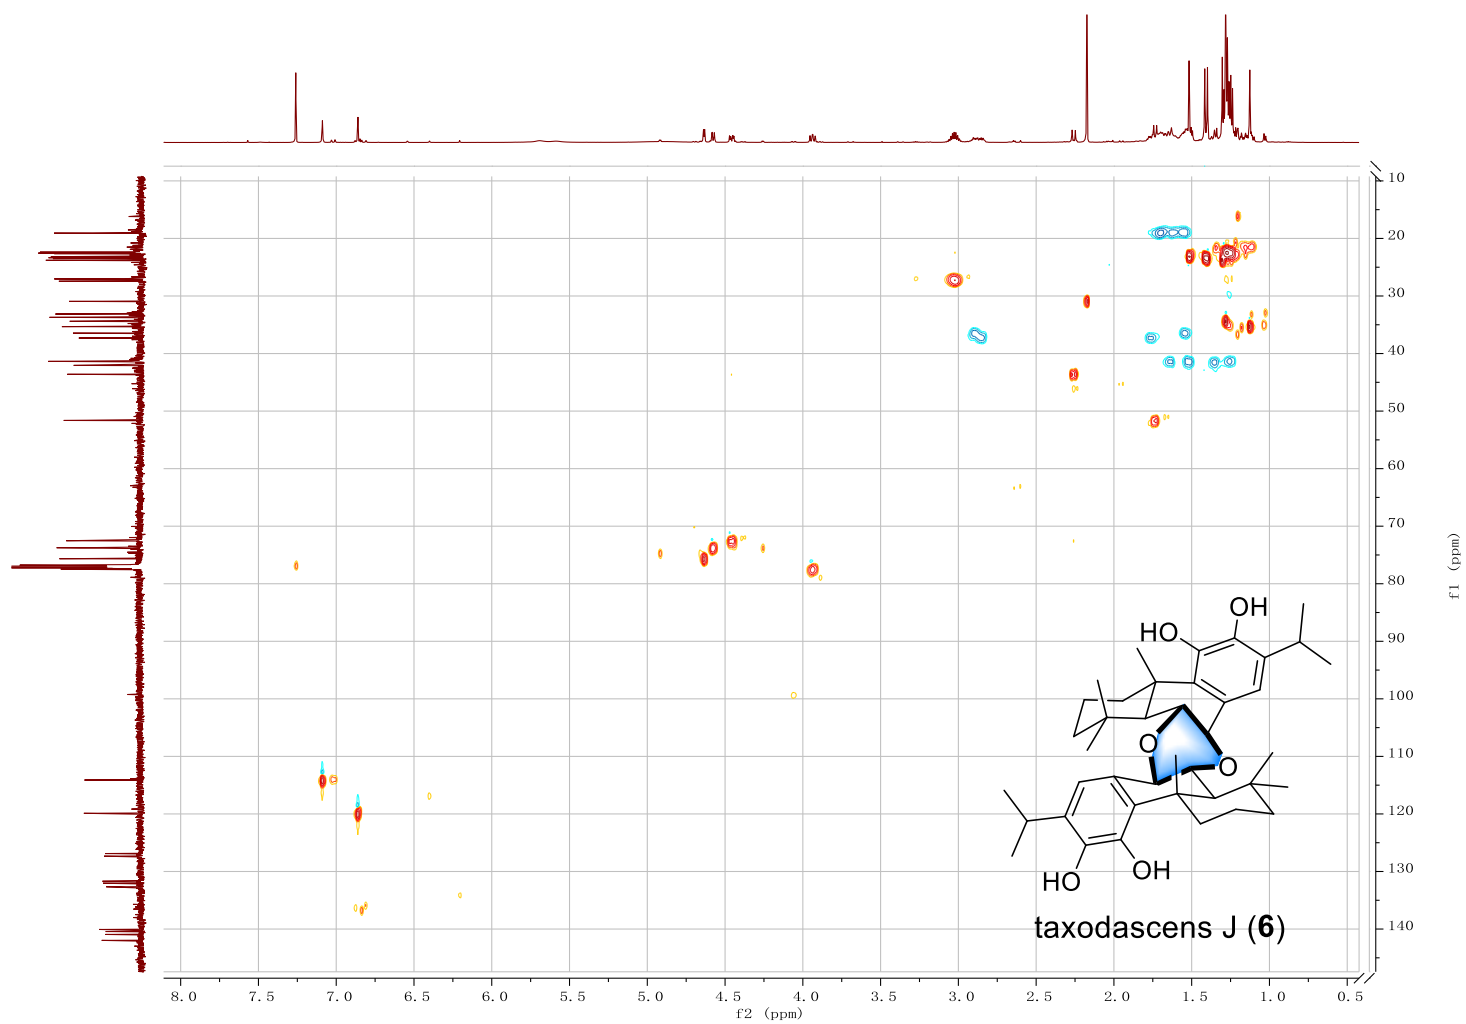

**Figure S55.** HSQC spectrum of taxodascens J (6) in chloroform (600 MHz)

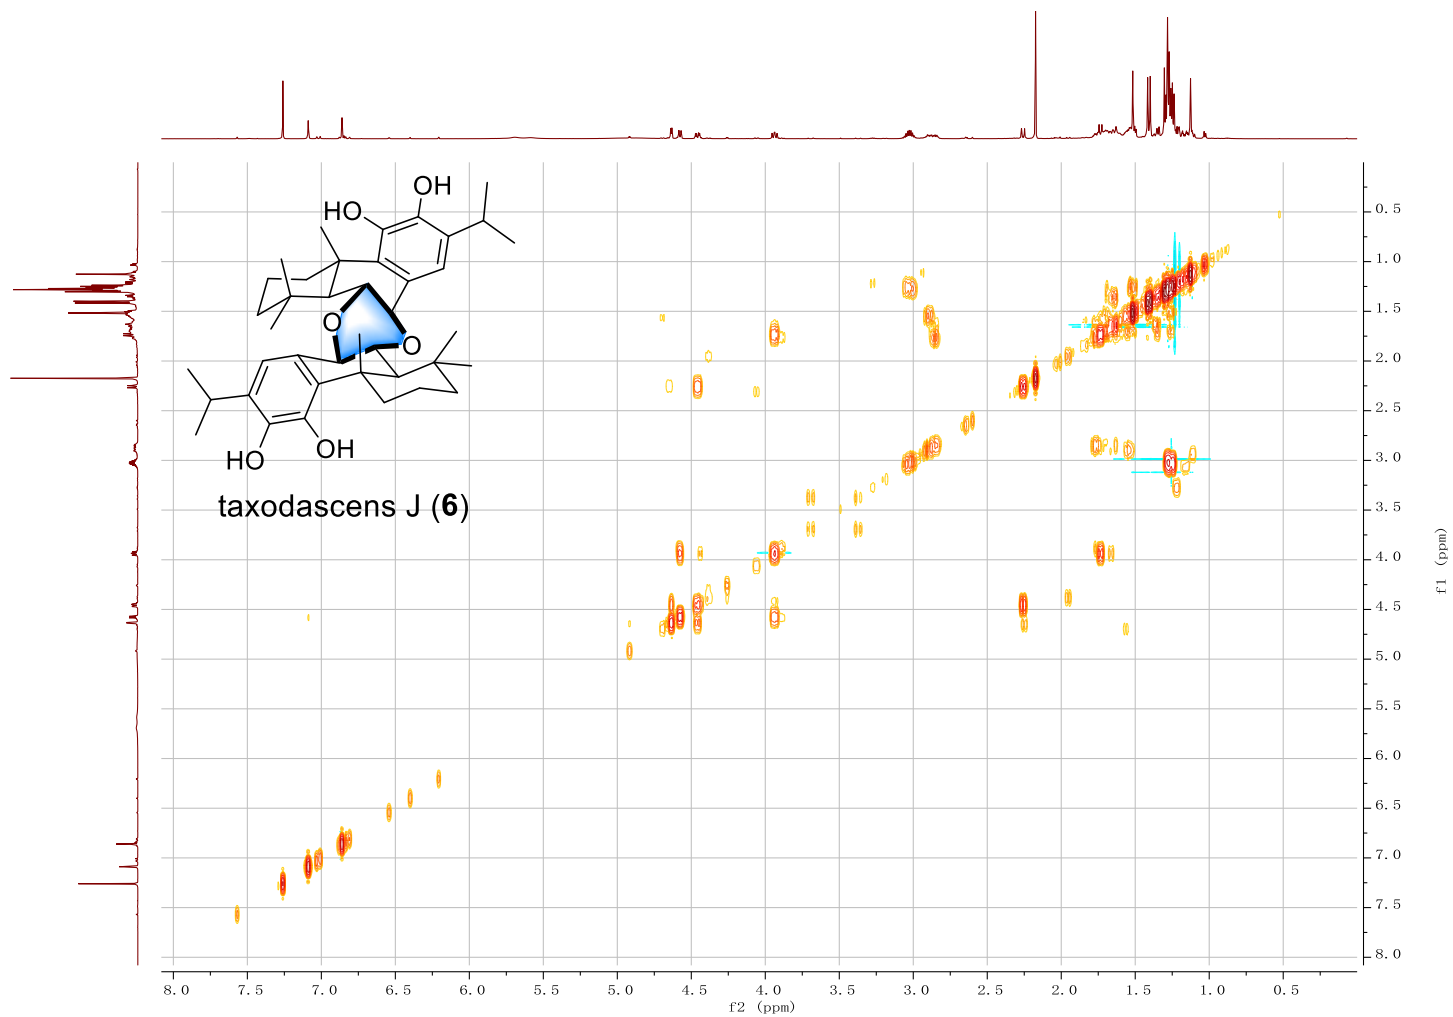

**Figure S56.**  $^1\text{H}$ - $^1\text{H}$  COSY spectrum of taxodascens J (6) in chloroform (600 MHz)

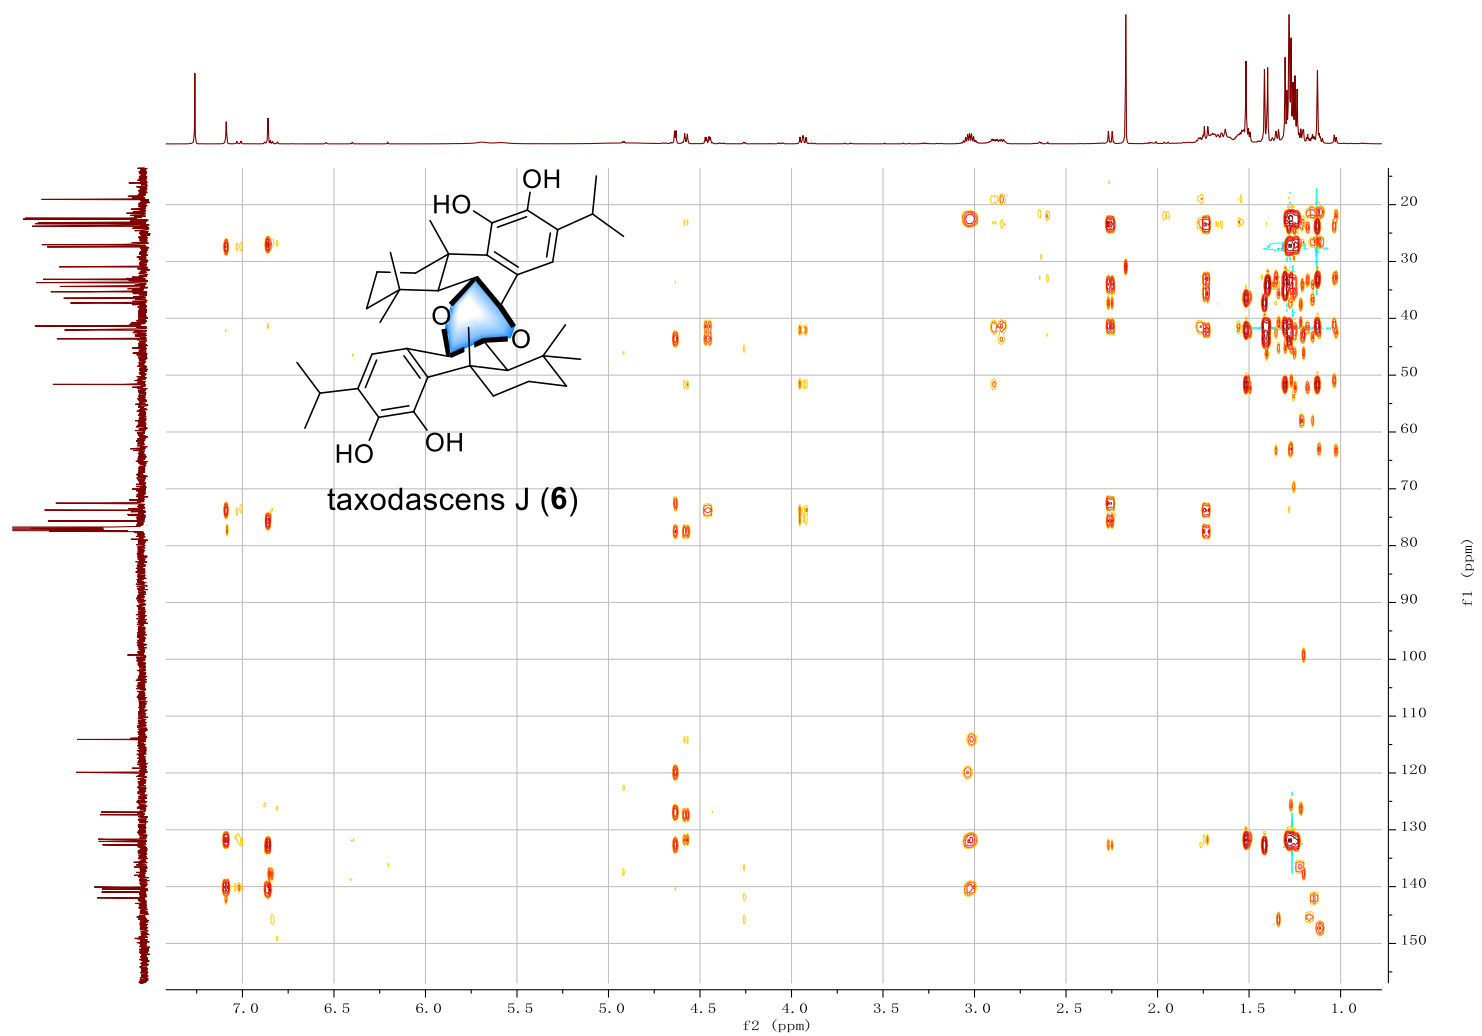

Figure S57. HMBC spectrum of taxodascens J (6) in chloroform (600 MHz)



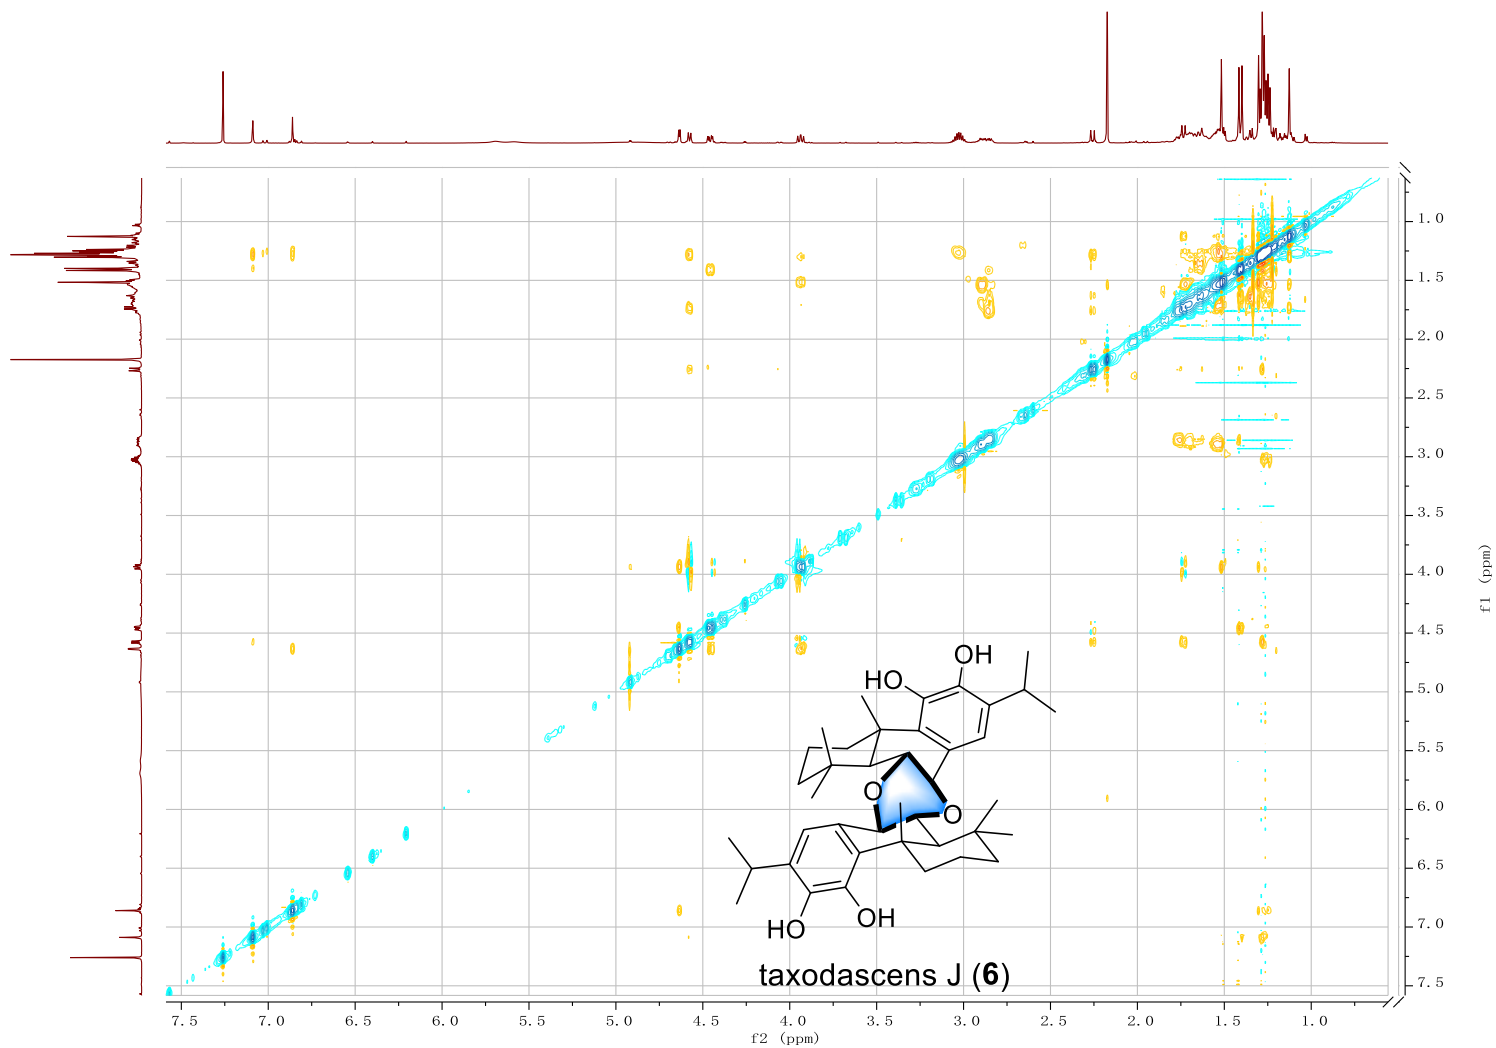

**Figure S58.** ROESY spectrum of taxodascens J (6) in chloroform (600 MHz)

8 #60 RT: 1.18 AV: 1 NL: 6.35E5  
T: FTMS + c ESI Full ms [100.00-800.00]

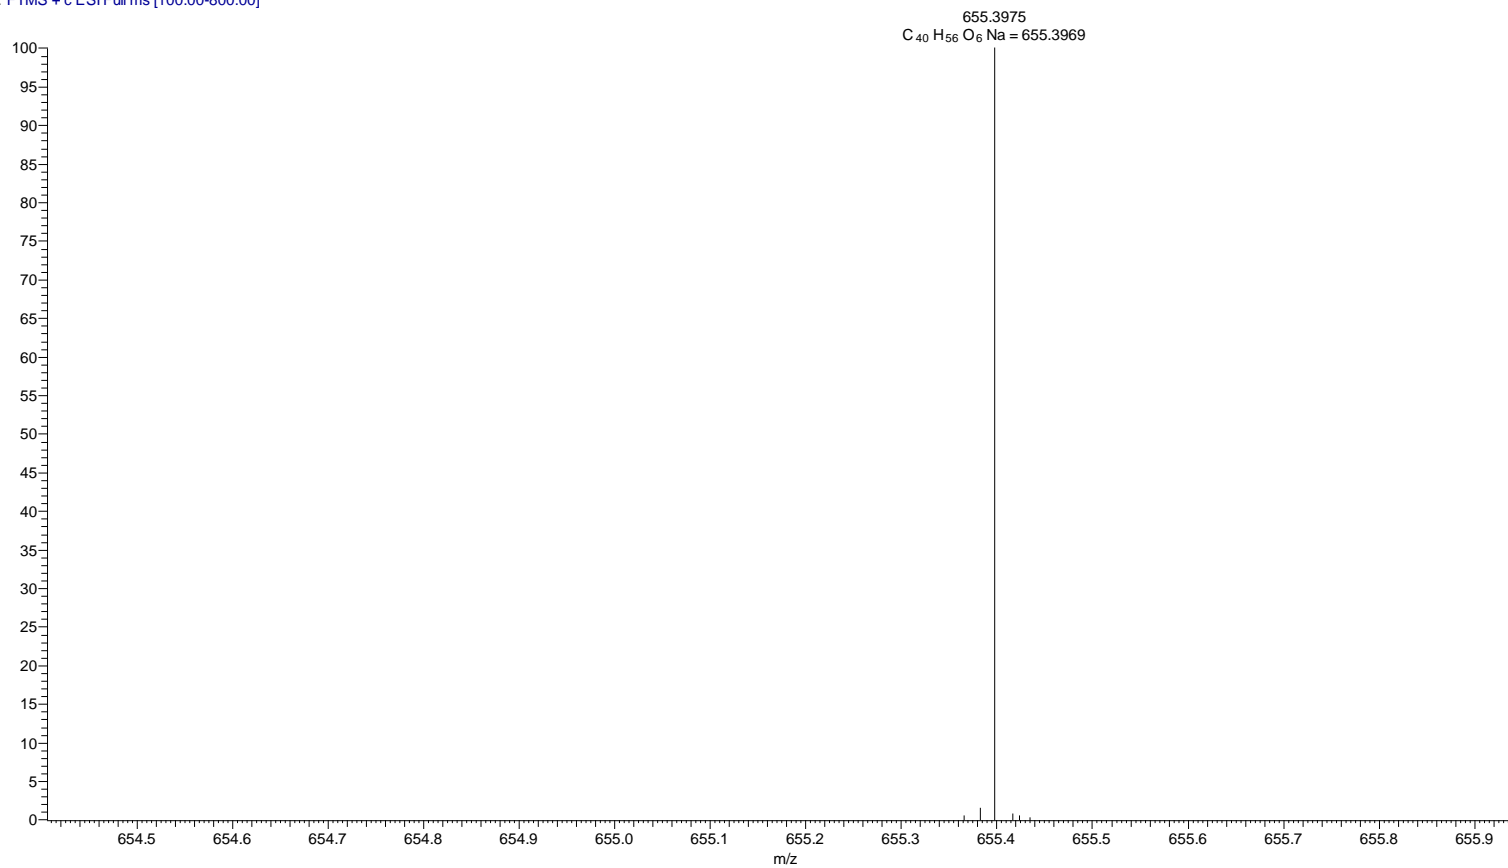

**Figure S59.** HRESIMS spectrum of taxodascens J (6)

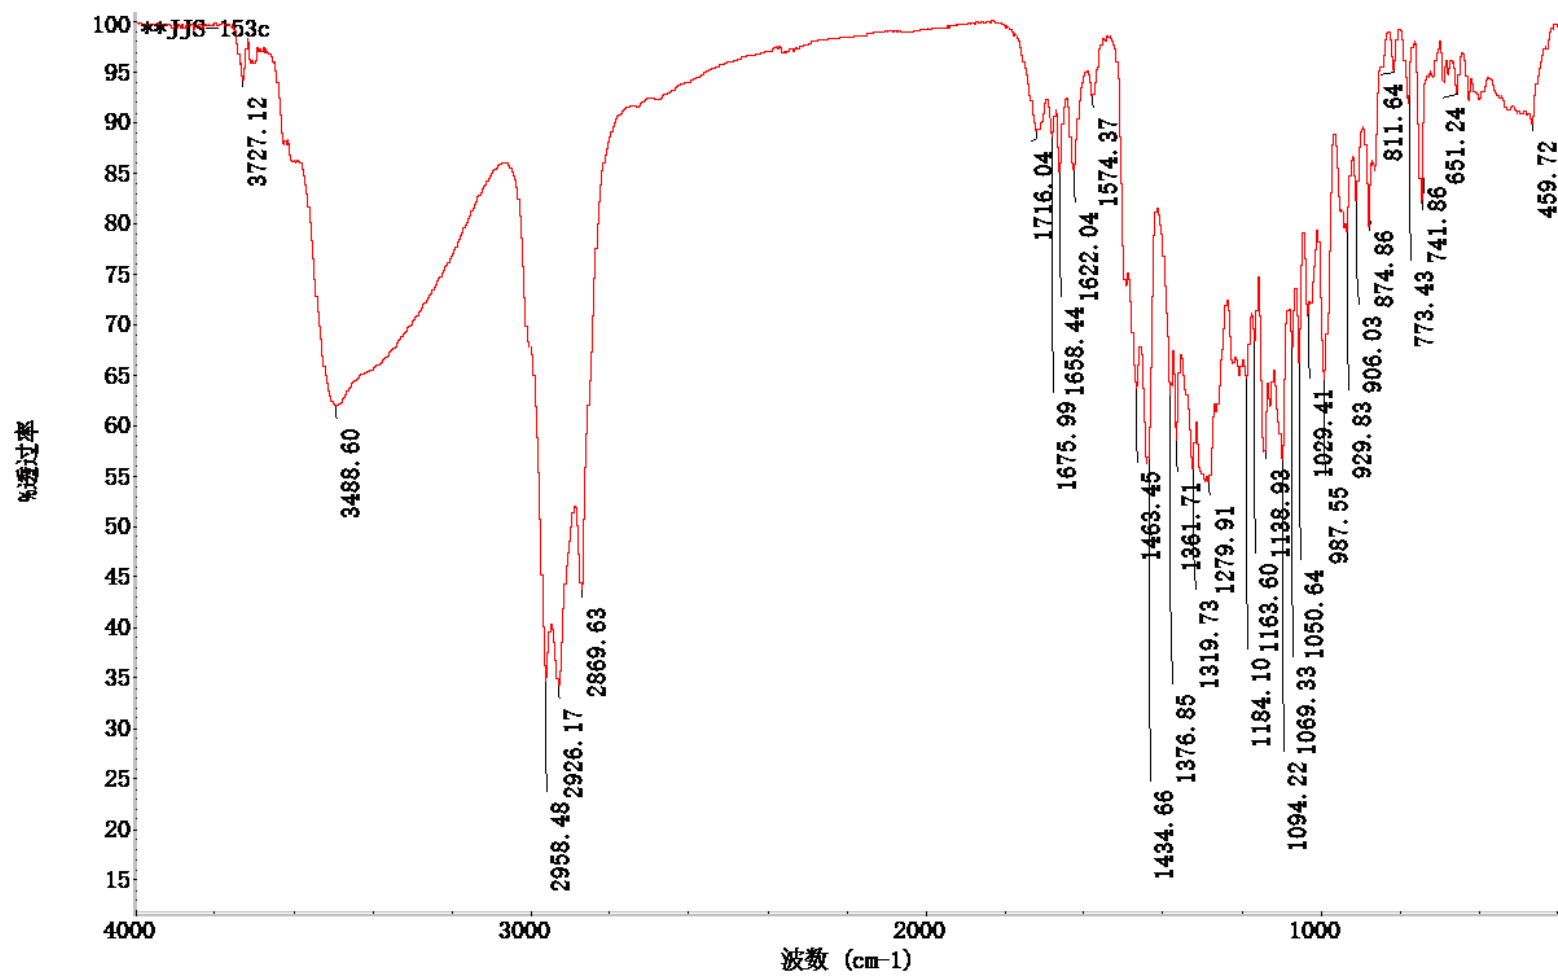

Figure S60. IR spectrum of taxodascens J (6)

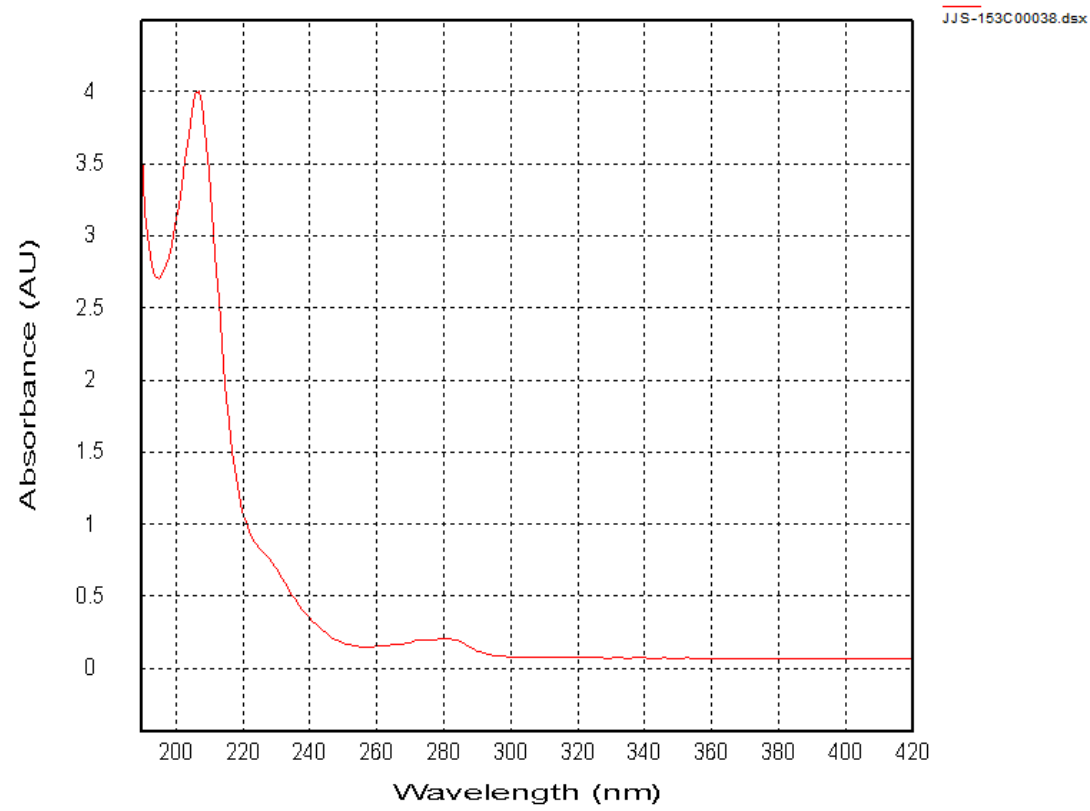

**Figure S61.** UV spectrum of taxodascens J (6)

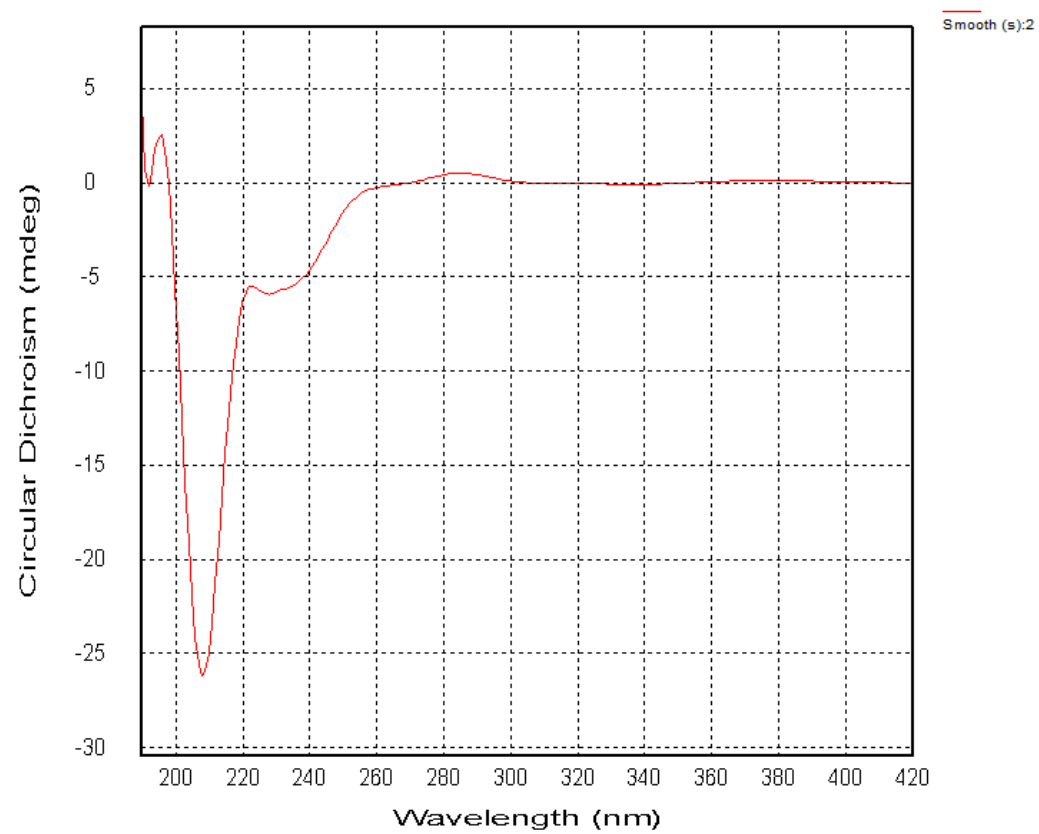

**Figure S62.** CD spectrum of taxodascens J (6)

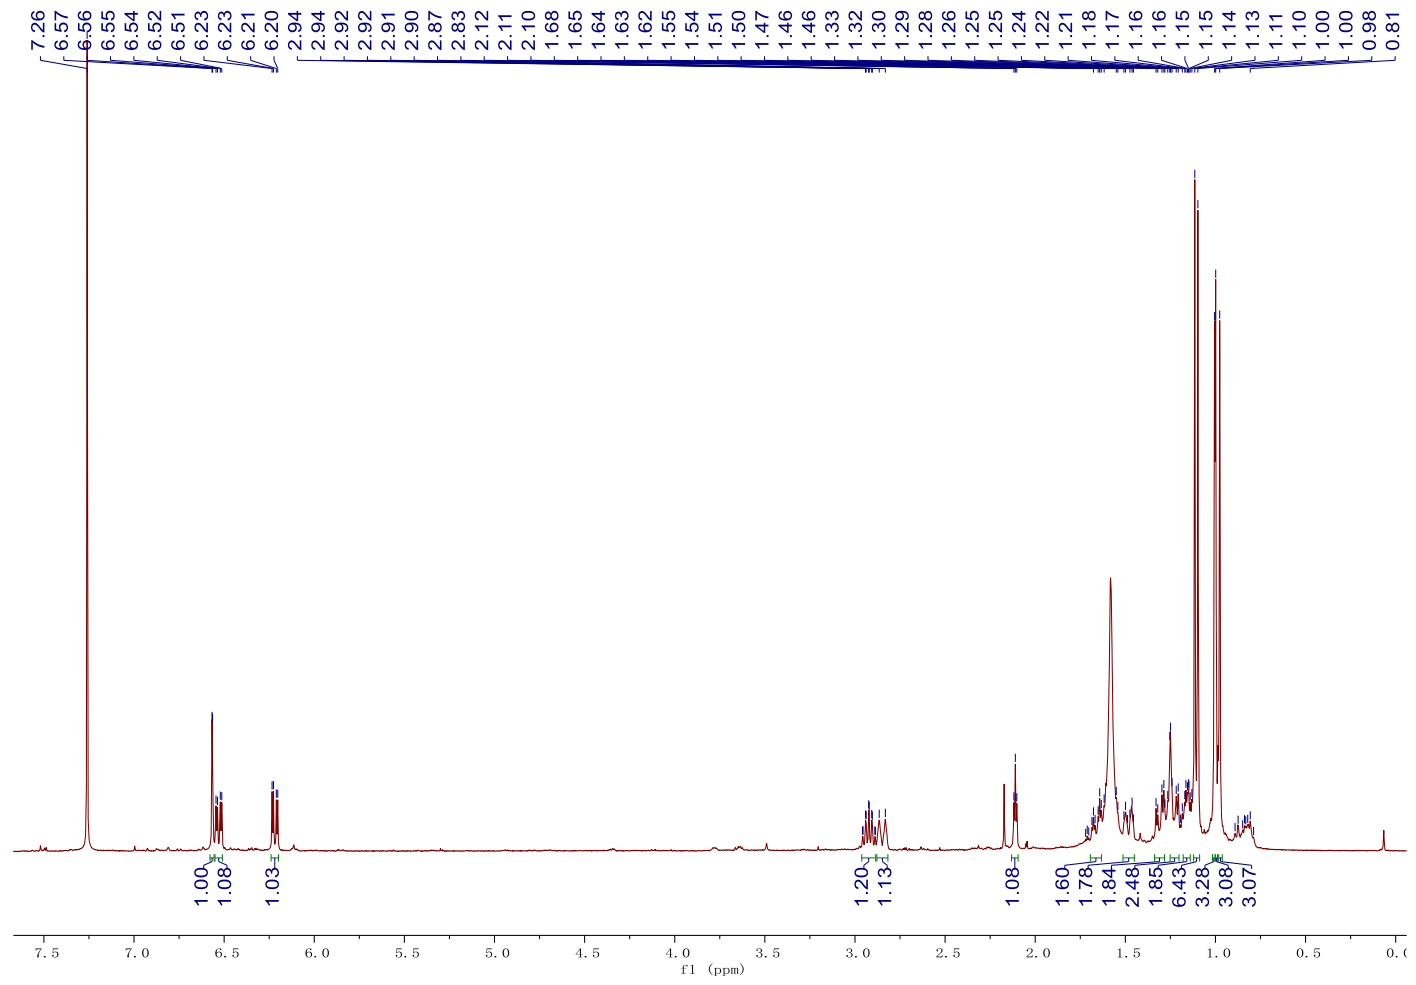

**Figure S63.**  $^1\text{H}$  NMR spectrum of abieta-6,8,13-triene-11,12-dione (**7**) in chloroform (400 MHz)

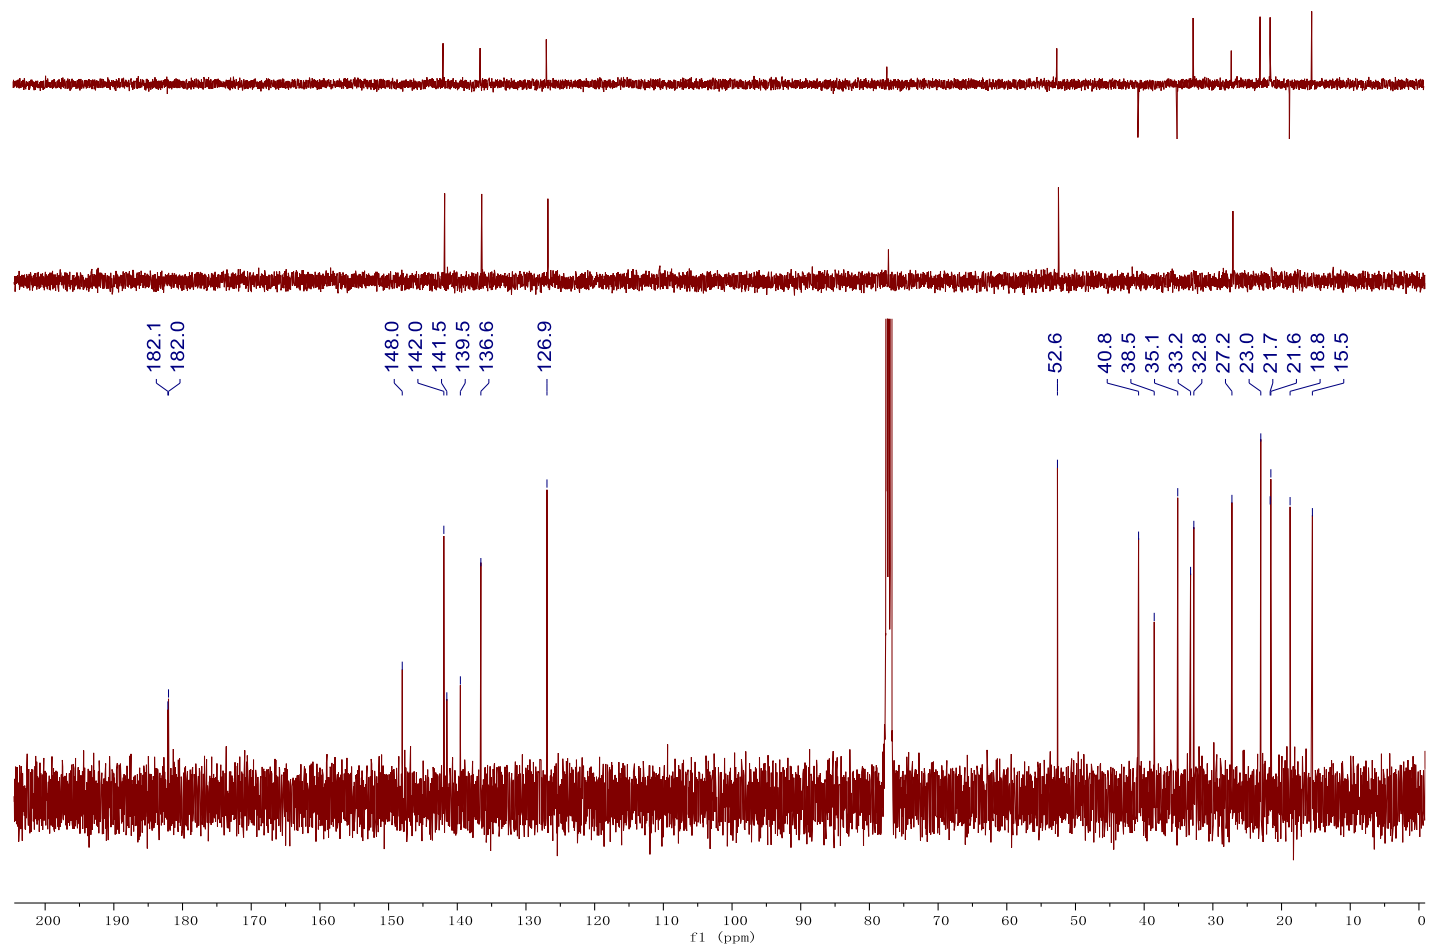

**Figure S64.** <sup>13</sup>C NMR spectrum of abieta-6,8,13-triene-11,12-dione (**7**) in chloroform (100 MHz)

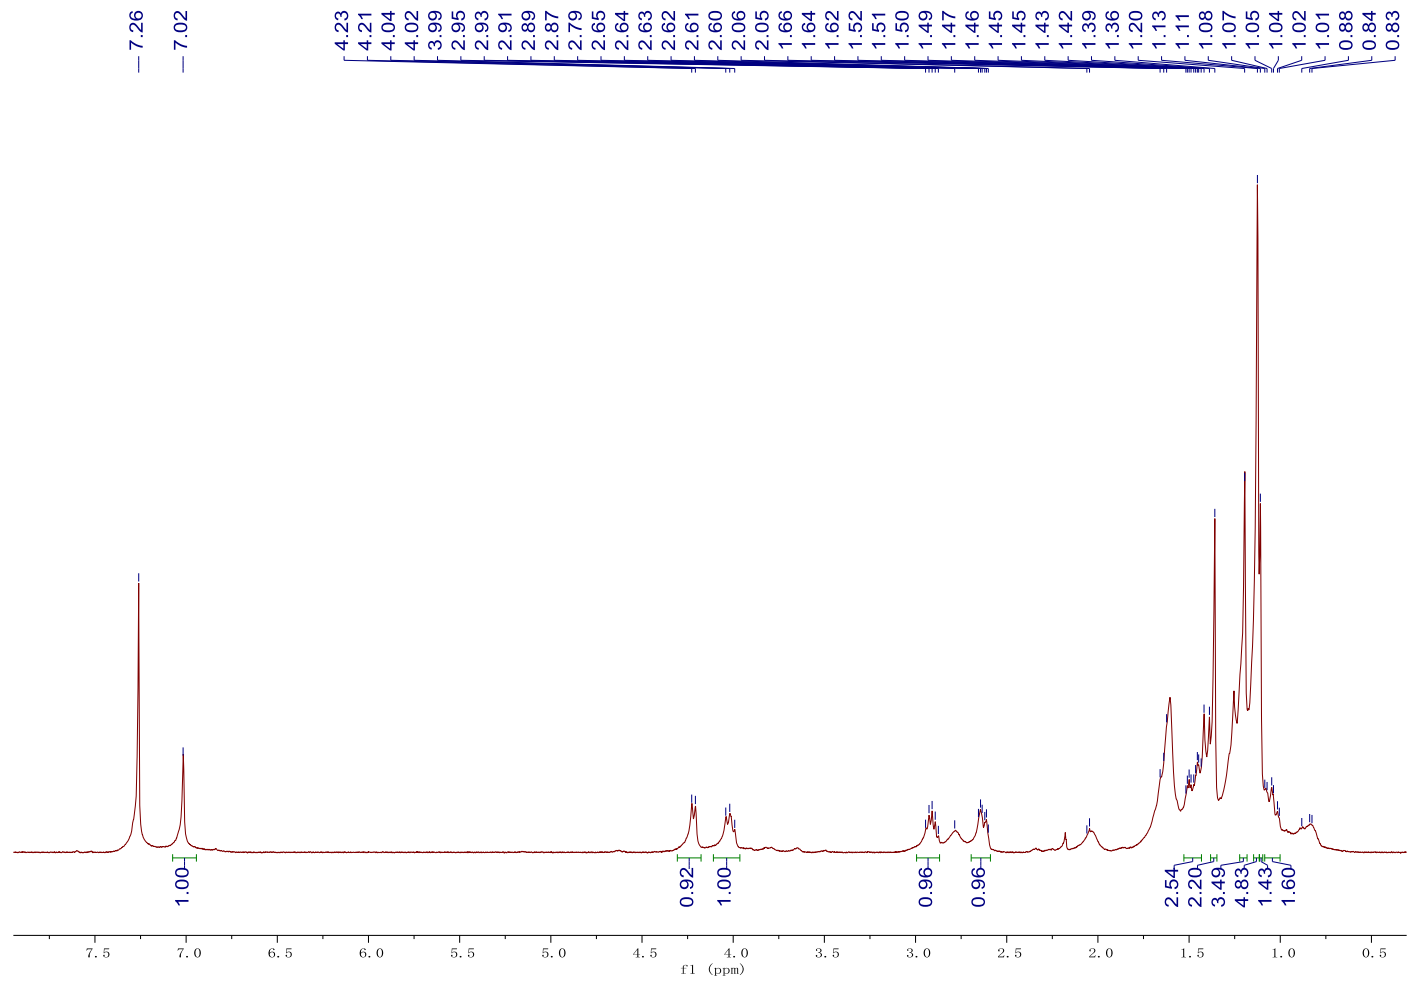

**Figure S65.**  $^1\text{H}$  NMR spectrum of salviphomone (**8**) in chloroform (400 MHz)



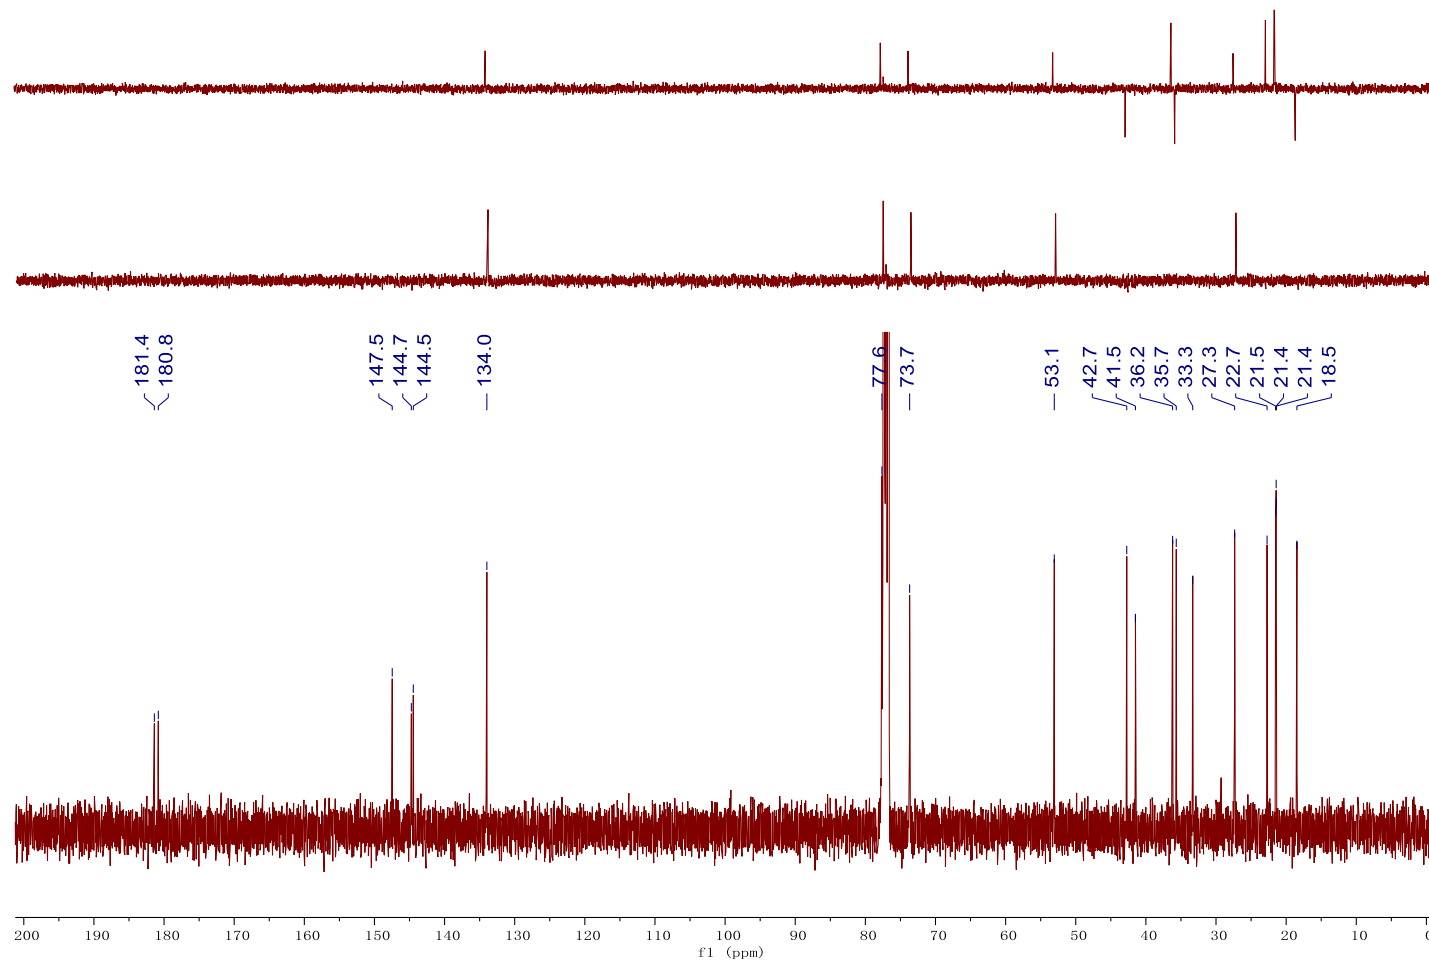

Figure S66.  $^{13}\text{C}$  NMR spectrum of salviphomone (**8**) in chloroform (100 MHz)

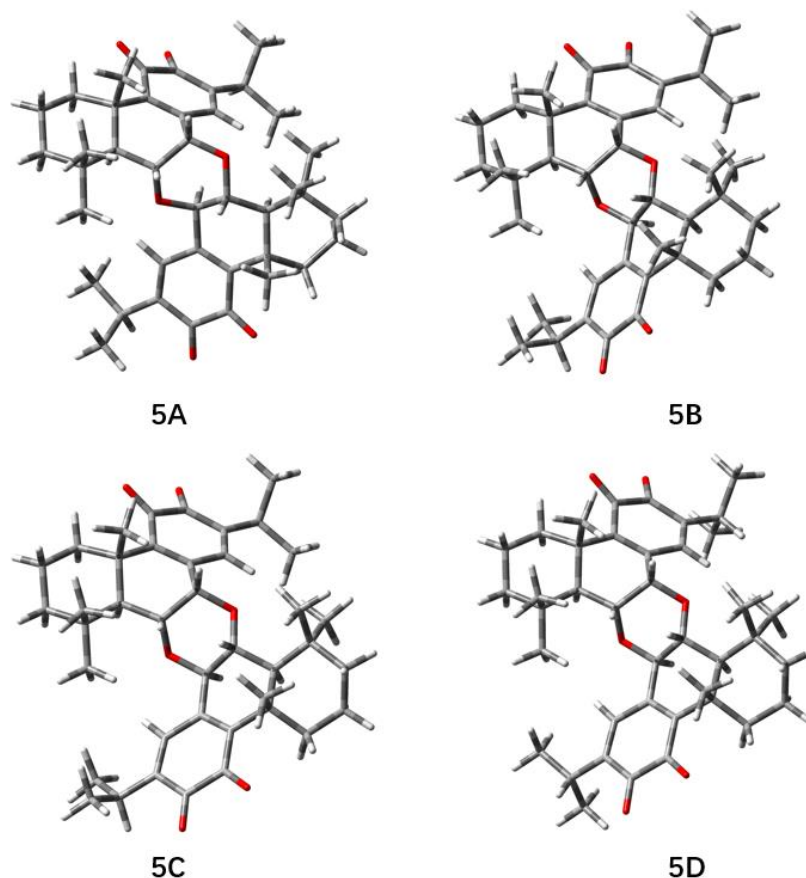

**Figure S67.** Possible conformers of **5** for ECD calculation.

**Table S2.** Important thermodynamic parameters and Boltzmann distributions of the optimized isomer **5** at m062x /6-311 + G (d, p) level in the methanol.

| Conformations | Energy (a.u) | $\Delta G(\text{kcal/mol})$ | %    | Number of imaginary frequencies |
|---------------|--------------|-----------------------------|------|---------------------------------|
| <b>5A</b>     | -2005.777588 | 0.00                        | 4.1  | 0                               |
| <b>5B</b>     | -2005.780499 | -1.83                       | 89.3 | 0                               |
| <b>5C</b>     | -2005.777855 | -0.17                       | 5.4  | 0                               |
| <b>5D</b>     | -2005.776388 | 0.75                        | 1.1  | 0                               |

**Table S3.** Optimized Z-matrixes of isomer **5** in the methanol ( $\text{\AA}$ ) at m062x/6-311 G (d, p) level.

| <b>5A</b> |          |          |          | <b>5B</b> |          |          |          |
|-----------|----------|----------|----------|-----------|----------|----------|----------|
| C         | -4.91538 | 3.123233 | -0.78195 | C         | -2.8832  | -4.72578 | 1.017085 |
| C         | -3.60214 | 3.858185 | -1.02858 | C         | -1.4261  | -4.77413 | 0.572737 |
| C         | -2.40884 | 1.668998 | -0.98193 | C         | -1.38274 | -2.27607 | 0.528428 |
| C         | -3.72443 | 0.851671 | -0.7489  | C         | -2.87333 | -2.15803 | 0.988582 |

|   |          |          |          |   |          |          |          |
|---|----------|----------|----------|---|----------|----------|----------|
| C | -4.70915 | 1.805825 | -0.03062 | C | -3.58603 | -3.45528 | 0.536851 |
| C | -1.18344 | 0.843964 | -1.42935 | C | -0.55307 | -0.99164 | 0.684172 |
| C | -1.42384 | -0.67044 | -1.36506 | C | -1.39961 | 0.289142 | 0.884153 |
| C | -2.19486 | -1.0325  | -0.11091 | C | -2.72291 | 0.20875  | 0.162385 |
| C | -3.31802 | -0.32329 | 0.147518 | C | -3.43777 | -0.93419 | 0.264667 |
| C | -1.71735 | -2.15782 | 0.702422 | C | -3.18663 | 1.411647 | -0.54526 |
| C | -2.32624 | -2.59422 | 1.816835 | C | -4.37126 | 1.515049 | -1.16821 |
| C | -3.56281 | -1.88814 | 2.213236 | C | -5.2483  | 0.329015 | -1.12089 |
| C | -4.18075 | -0.85862 | 1.219449 | C | -4.84163 | -0.85202 | -0.19069 |
| C | -1.8439  | -3.71713 | 2.698745 | C | -4.86037 | 2.72281  | -1.92649 |
| C | -0.41793 | -4.15568 | 2.378251 | C | -3.75953 | 3.743621 | -2.20088 |
| C | -2.80782 | -4.91134 | 2.606757 | C | -6.02881 | 3.377639 | -1.17197 |
| C | -2.55325 | 3.003528 | -1.76177 | C | -0.61747 | -3.54209 | 1.014705 |
| C | -1.21743 | 3.762441 | -1.70986 | C | 0.749484 | -3.61274 | 0.31635  |
| C | -2.9389  | 2.828889 | -3.23793 | C | -0.36292 | -3.59399 | 2.529836 |
| C | -4.42642 | 0.28055  | -2.00808 | C | -3.10641 | -1.95271 | 2.504567 |
| O | -5.35466 | -0.60868 | 1.360845 | O | -5.72919 | -1.59449 | 0.158436 |
| O | -4.13254 | -2.07529 | 3.260911 | O | -6.27216 | 0.225553 | -1.75253 |
| C | 4.177586 | -3.42637 | -0.33877 | C | 3.463977 | 4.679552 | 0.716817 |
| C | 3.588756 | -3.66907 | -1.72413 | C | 2.010767 | 4.984001 | 0.370274 |
| C | 2.100435 | -1.75542 | -0.94919 | C | 1.539694 | 2.536822 | 0.257951 |
| C | 3.451411 | -0.98354 | -0.80741 | C | 3.016568 | 2.169719 | 0.652696 |
| C | 4.472648 | -1.93678 | -0.10891 | C | 3.913487 | 3.328775 | 0.156582 |
| C | 0.991695 | -0.77237 | -1.31415 | C | 0.696684 | 1.289811 | 0.516518 |
| C | 0.775812 | 0.201451 | -0.17603 | C | 1.030443 | 0.300828 | -0.58157 |
| C | 2.052009 | 0.824017 | 0.319775 | C | 2.508019 | -0.01421 | -0.5863  |
| C | 3.249358 | 0.26736  | 0.045602 | C | 3.396321 | 0.853491 | -0.04622 |
| C | 1.869437 | 2.036665 | 1.135297 | C | 2.874338 | -1.27015 | -1.25856 |
| C | 2.867789 | 2.734612 | 1.697004 | C | 4.127938 | -1.72624 | -1.39577 |
| C | 4.236708 | 2.221921 | 1.488943 | C | 5.20327  | -0.8746  | -0.85207 |
| C | 4.441396 | 0.989094 | 0.553534 | C | 4.816478 | 0.422824 | -0.0706  |
| C | 2.708242 | 3.984696 | 2.524699 | C | 4.52519  | -3.02173 | -2.05546 |
| C | 1.274618 | 4.215224 | 2.993837 | C | 3.415289 | -3.62399 | -2.91192 |
| C | 3.220417 | 5.200407 | 1.735189 | C | 4.984205 | -4.02492 | -0.98447 |
| C | 2.182967 | -3.03053 | -1.85484 | C | 0.999635 | 3.894383 | 0.783879 |
| C | 1.168852 | -4.07171 | -1.34714 | C | -0.32328 | 4.252747 | 0.076301 |
| C | 1.875453 | -2.74701 | -3.33189 | C | 0.730156 | 3.918736 | 2.294775 |
| C | 4.025433 | -0.49166 | -2.15766 | C | 3.261311 | 1.95207  | 2.166313 |
| O | -0.24689 | -1.44307 | -1.5448  | O | -0.70672 | 1.464948 | 0.471139 |
| O | -0.10244 | 1.239714 | -0.5717  | O | 0.207262 | -0.85771 | -0.51673 |
| O | 5.580679 | 0.699005 | 0.278648 | O | 5.718466 | 0.988084 | 0.50072  |
| O | 5.214827 | 2.702308 | 2.007683 | O | 6.37732  | -1.12358 | -0.97829 |
| H | -2.13175 | 1.975273 | 0.034018 | H | -1.4618  | -2.39463 | -0.5601  |

|   |          |          |          |   |          |          |          |
|---|----------|----------|----------|---|----------|----------|----------|
| H | 1.864642 | -2.1142  | 0.064159 | H | 1.577104 | 2.672625 | -0.8325  |
| H | -5.58443 | 3.757276 | -0.19435 | H | -3.41784 | -5.59151 | 0.617693 |
| H | -5.43089 | 2.944466 | -1.73005 | H | -2.95045 | -4.80951 | 2.105811 |
| H | -3.77761 | 4.776533 | -1.59878 | H | -0.93713 | -5.6767  | 0.954087 |
| H | -3.18011 | 4.159739 | -0.0617  | H | -1.39221 | -4.83178 | -0.52251 |
| H | -4.31973 | 2.024435 | 0.971096 | H | -3.62812 | -3.46598 | -0.55936 |
| H | -5.66717 | 1.306554 | 0.102507 | H | -4.61346 | -3.44858 | 0.895142 |
| H | -0.89368 | 1.080431 | -2.45772 | H | 0.130417 | -1.08588 | 1.533274 |
| H | -2.0633  | -0.92733 | -2.21147 | H | -1.61225 | 0.388193 | 1.956493 |
| H | -0.7966  | -2.62052 | 0.366702 | H | -2.48256 | 2.232631 | -0.57694 |
| H | -1.87895 | -3.34071 | 3.72692  | H | -5.24788 | 2.354122 | -2.88244 |
| H | -0.09177 | -4.90679 | 3.099585 | H | -4.15452 | 4.555021 | -2.81457 |
| H | 0.283056 | -3.31776 | 2.414144 | H | -2.91441 | 3.294848 | -2.72775 |
| H | -0.36457 | -4.60619 | 1.383031 | H | -3.38937 | 4.182694 | -1.26966 |
| H | -3.82512 | -4.62366 | 2.873869 | H | -6.4215  | 4.21876  | -1.74711 |
| H | -2.81246 | -5.31068 | 1.589101 | H | -6.84049 | 2.669185 | -1.00273 |
| H | -2.48569 | -5.70436 | 3.284775 | H | -5.68546 | 3.753533 | -0.20453 |
| H | -0.86308 | 3.865285 | -0.68079 | H | 1.428088 | -2.82585 | 0.657041 |
| H | -0.43538 | 3.259056 | -2.28354 | H | 1.216952 | -4.57762 | 0.533675 |
| H | -1.353   | 4.762048 | -2.13205 | H | 0.638503 | -3.51671 | -0.76668 |
| H | -2.27801 | 2.123942 | -3.7499  | H | 0.333516 | -4.40996 | 2.741849 |
| H | -2.84616 | 3.791762 | -3.74795 | H | -1.26373 | -3.77812 | 3.11141  |
| H | -3.96271 | 2.484548 | -3.37286 | H | 0.094104 | -2.67392 | 2.902808 |
| H | -5.02327 | -0.58916 | -1.72422 | H | -3.08714 | -2.89621 | 3.046661 |
| H | -3.73759 | -0.02144 | -2.79684 | H | -4.09543 | -1.51478 | 2.657691 |
| H | -5.10987 | 1.007731 | -2.44364 | H | -2.36817 | -1.29475 | 2.965545 |
| H | 3.476696 | -3.79257 | 0.418312 | H | 4.104812 | 5.463135 | 0.304062 |
| H | 5.098204 | -3.9985  | -0.20532 | H | 3.612394 | 4.711587 | 1.799843 |
| H | 4.270666 | -3.27883 | -2.48434 | H | 1.701285 | 5.932891 | 0.82077  |
| H | 3.498883 | -4.74136 | -1.92089 | H | 1.934875 | 5.112959 | -0.71704 |
| H | 4.483109 | -1.73782 | 0.966345 | H | 3.868042 | 3.360604 | -0.93889 |
| H | 5.471058 | -1.69726 | -0.47728 | H | 4.948496 | 3.138688 | 0.435348 |
| H | 1.258675 | -0.20763 | -2.21613 | H | 0.962639 | 0.878931 | 1.495212 |
| H | 0.327258 | -0.35521 | 0.665352 | H | 0.784326 | 0.78088  | -1.53753 |
| H | 0.841581 | 2.352361 | 1.270456 | H | 2.040846 | -1.83571 | -1.65828 |
| H | 3.352824 | 3.862615 | 3.401588 | H | 5.386045 | -2.79826 | -2.69413 |
| H | 0.885038 | 3.352862 | 3.539089 | H | 3.788733 | -4.50964 | -3.42878 |
| H | 0.611345 | 4.416672 | 2.147749 | H | 3.05353  | -2.916   | -3.66067 |
| H | 1.239252 | 5.08323  | 3.654363 | H | 2.568714 | -3.93551 | -2.29336 |
| H | 3.158309 | 6.099908 | 2.351265 | H | 5.323084 | -4.94919 | -1.45718 |
| H | 4.257792 | 5.066537 | 1.426542 | H | 5.804077 | -3.62307 | -0.38795 |
| H | 2.606723 | 5.351852 | 0.843129 | H | 4.151045 | -4.26468 | -0.31782 |
| H | 0.150728 | -3.68626 | -1.37965 | H | -1.16766 | 3.716029 | 0.503962 |

|           |          |          |          |           |          |          |          |
|-----------|----------|----------|----------|-----------|----------|----------|----------|
| H         | 1.217985 | -4.96638 | -1.97413 | H         | -0.50585 | 5.325471 | 0.191087 |
| H         | 1.397488 | -4.37036 | -0.3195  | H         | -0.27741 | 4.030589 | -0.99429 |
| H         | 2.029119 | -3.66315 | -3.90978 | H         | 0.146291 | 4.810658 | 2.539175 |
| H         | 2.52297  | -1.97753 | -3.75407 | H         | 1.636739 | 3.949406 | 2.896349 |
| H         | 0.837902 | -2.43438 | -3.46249 | H         | 0.144014 | 3.045977 | 2.597995 |
| H         | 4.910545 | 0.115812 | -1.96756 | H         | 4.216195 | 1.446547 | 2.307303 |
| H         | 3.308748 | 0.121141 | -2.70771 | H         | 2.489653 | 1.341949 | 2.636794 |
| H         | 4.331647 | -1.31847 | -2.7943  | H         | 3.319116 | 2.892621 | 2.707958 |
| <b>5C</b> |          |          |          | <b>5D</b> |          |          |          |
| C         | -2.87002 | -4.74047 | 0.96796  | C         | 3.108839 | -4.5565  | -1.16921 |
| C         | -1.41265 | -4.78181 | 0.524535 | C         | 1.652715 | -4.68782 | -0.73978 |
| C         | -1.37551 | -2.28259 | 0.491995 | C         | 1.477185 | -2.19614 | -0.6458  |
| C         | -2.86669 | -2.17235 | 0.95152  | C         | 2.964575 | -1.99439 | -1.08756 |
| C         | -3.57559 | -3.46953 | 0.493617 | C         | 3.739961 | -3.26214 | -0.6561  |
| C         | -0.55154 | -0.9962  | 0.659712 | C         | 0.587235 | -0.95152 | -0.79371 |
| C         | -1.40286 | 0.28433  | 0.853668 | C         | 1.373386 | 0.376019 | -0.94364 |
| C         | -2.72862 | 0.200004 | 0.137305 | C         | 2.689696 | 0.340818 | -0.20605 |
| C         | -3.43691 | -0.94734 | 0.235008 | C         | 3.46049  | -0.7622  | -0.33082 |
| C         | -3.20555 | 1.405572 | -0.55716 | C         | 3.0933   | 1.539163 | 0.543406 |
| C         | -4.39109 | 1.504491 | -1.17907 | C         | 4.258501 | 1.678369 | 1.197653 |
| C         | -5.257   | 0.309977 | -1.14232 | C         | 5.199377 | 0.544606 | 1.114325 |
| C         | -4.84314 | -0.86968 | -0.21494 | C         | 4.855954 | -0.61995 | 0.135487 |
| C         | -4.89225 | 2.713679 | -1.92715 | C         | 4.6035   | 2.900757 | 2.013245 |
| C         | -3.80376 | 3.751029 | -2.18771 | C         | 5.88702  | 3.576148 | 1.513211 |
| C         | -6.07171 | 3.346844 | -1.17129 | C         | 4.698886 | 2.569968 | 3.509052 |
| C         | -0.60832 | -3.54972 | 0.974087 | C         | 0.78541  | -3.49056 | -1.16668 |
| C         | 0.7601   | -3.61464 | 0.278863 | C         | -0.58339 | -3.64908 | -0.48836 |
| C         | -0.35604 | -3.60948 | 2.489473 | C         | 0.55125  | -3.52589 | -2.68578 |
| C         | -3.10029 | -1.97353 | 2.468208 | C         | 3.199467 | -1.74329 | -2.59659 |
| O         | -5.72677 | -1.61533 | 0.137172 | O         | 5.782807 | -1.29856 | -0.23968 |
| O         | -6.27726 | 0.199938 | -1.77856 | O         | 6.232589 | 0.464399 | 1.734642 |
| C         | 3.116803 | 4.721451 | -0.03175 | C         | -3.37513 | 4.564062 | -0.05569 |
| C         | 2.129677 | 4.871244 | 1.123266 | C         | -2.39263 | 4.768298 | -1.20597 |
| C         | 1.51671  | 2.548956 | 0.309522 | C         | -1.66561 | 2.474474 | -0.40076 |
| C         | 3.016371 | 2.211644 | 0.603167 | C         | -3.14535 | 2.065603 | -0.70315 |
| C         | 3.872927 | 3.382992 | 0.027242 | C         | -4.0618  | 3.189502 | -0.12464 |
| C         | 0.697018 | 1.283767 | 0.5227   | C         | -0.78116 | 1.255605 | -0.62384 |
| C         | 1.050393 | 0.303561 | -0.57808 | C         | -1.09221 | 0.237085 | 0.454928 |
| C         | 2.527204 | -0.00565 | -0.57866 | C         | -2.55336 | -0.14003 | 0.452925 |
| C         | 3.403235 | 0.890618 | -0.07089 | C         | -3.47027 | 0.723748 | -0.03856 |
| C         | 2.915315 | -1.27039 | -1.22016 | C         | -2.88464 | -1.42413 | 1.089266 |
| C         | 4.177396 | -1.70917 | -1.33948 | C         | -4.13126 | -1.88833 | 1.264896 |
| C         | 5.240754 | -0.82466 | -0.82291 | C         | -5.23307 | -1.04913 | 0.75332  |

|   |          |          |          |   |          |          |          |
|---|----------|----------|----------|---|----------|----------|----------|
| C | 4.8362   | 0.517035 | -0.13128 | C | -4.88596 | 0.291223 | 0.030392 |
| C | 4.595798 | -3.02211 | -1.95027 | C | -4.5012  | -3.17412 | 1.959607 |
| C | 3.502471 | -3.6649  | -2.79872 | C | -5.06864 | -2.86929 | 3.355244 |
| C | 5.051036 | -3.98418 | -0.84059 | C | -3.3399  | -4.15989 | 2.050712 |
| C | 0.986887 | 3.828947 | 1.027147 | C | -1.19889 | 3.785247 | -1.10798 |
| C | -0.1256  | 4.439444 | 0.156509 | C | -0.12517 | 4.449084 | -0.22826 |
| C | 0.402839 | 3.554852 | 2.420173 | C | -0.59404 | 3.549878 | -2.49923 |
| C | 3.325911 | 2.03216  | 2.108558 | C | -3.44005 | 1.878555 | -2.21082 |
| O | -0.70778 | 1.454892 | 0.430313 | O | 0.611842 | 1.499557 | -0.50958 |
| O | 0.224909 | -0.85521 | -0.53032 | O | -0.21377 | -0.88147 | 0.386437 |
| O | 5.733929 | 1.178919 | 0.33217  | O | -5.81095 | 0.903616 | -0.44723 |
| O | 6.417598 | -1.0754  | -0.91625 | O | -6.39795 | -1.34935 | 0.850763 |
| H | -1.45169 | -2.39496 | -0.59746 | H | 1.548698 | -2.33046 | 0.44152  |
| H | 1.477919 | 2.770231 | -0.76546 | H | -1.64083 | 2.687695 | 0.676374 |
| H | -3.40188 | -5.60558 | 0.563543 | H | 3.683966 | -5.40183 | -0.78259 |
| H | -2.9381  | -4.82998 | 2.056175 | H | 3.189594 | -4.61341 | -2.25872 |
| H | -0.92089 | -5.68471 | 0.901447 | H | 1.213729 | -5.60659 | -1.1426  |
| H | -1.37759 | -4.83342 | -0.57098 | H | 1.612223 | -4.76807 | 0.353827 |
| H | -3.61715 | -3.47512 | -0.60267 | H | 3.77285  | -3.29375 | 0.440063 |
| H | -4.60309 | -3.46726 | 0.851564 | H | 4.768682 | -3.19378 | -1.0041  |
| H | 0.120963 | -1.09161 | 1.51725  | H | -0.06616 | -1.06088 | -1.66407 |
| H | -1.61176 | 0.390944 | 1.926804 | H | 1.595469 | 0.516527 | -2.0101  |
| H | -2.51115 | 2.234231 | -0.58058 | H | 2.362602 | 2.337155 | 0.587239 |
| H | -5.27141 | 2.349058 | -2.88802 | H | 3.775272 | 3.602811 | 1.875068 |
| H | -4.20615 | 4.561422 | -2.79786 | H | 6.053965 | 4.504497 | 2.063767 |
| H | -2.94939 | 3.318014 | -2.71279 | H | 5.815846 | 3.816994 | 0.450498 |
| H | -3.44634 | 4.188629 | -1.25098 | H | 6.750262 | 2.926925 | 1.666389 |
| H | -5.73722 | 3.716849 | -0.1985  | H | 3.777346 | 2.106569 | 3.867285 |
| H | -6.47147 | 4.189196 | -1.73968 | H | 5.529019 | 1.88868  | 3.700149 |
| H | -6.87591 | 2.627414 | -1.01315 | H | 4.866345 | 3.486129 | 4.079823 |
| H | 1.227038 | -4.58141 | 0.489047 | H | -0.49424 | -3.57277 | 0.598491 |
| H | 0.65144  | -3.50945 | -0.8036  | H | -1.29911 | -2.89256 | -0.82207 |
| H | 1.43742  | -2.83081 | 0.628761 | H | -0.99447 | -4.6328  | -0.73385 |
| H | 0.345203 | -4.42246 | 2.69705  | H | 1.466868 | -3.65008 | -3.25996 |
| H | -1.25626 | -3.80346 | 3.068639 | H | 0.048878 | -2.62512 | -3.04723 |
| H | 0.09478  | -2.68925 | 2.869444 | H | -0.09757 | -4.374   | -2.92145 |
| H | -3.07211 | -2.91801 | 3.008053 | H | 4.162566 | -1.24547 | -2.73052 |
| H | -4.09301 | -1.54473 | 2.623228 | H | 2.428    | -1.11975 | -3.05116 |
| H | -2.36747 | -1.30964 | 2.929638 | H | 3.240219 | -2.67466 | -3.15819 |
| H | 2.572836 | 4.802982 | -0.97809 | H | -2.83948 | 4.66818  | 0.893173 |
| H | 3.839772 | 5.539924 | -0.0247  | H | -4.13861 | 5.344901 | -0.06177 |
| H | 2.662071 | 4.782692 | 2.07398  | H | -2.91612 | 4.656491 | -2.15914 |
| H | 1.685895 | 5.871324 | 1.117633 | H | -1.99997 | 5.789465 | -1.19505 |

|   |          |          |          |   |          |          |          |
|---|----------|----------|----------|---|----------|----------|----------|
| H | 4.21707  | 3.124995 | -0.97827 | H | -4.3964  | 2.909278 | 0.878165 |
| H | 4.767104 | 3.489464 | 0.642729 | H | -4.95777 | 3.253739 | -0.74334 |
| H | 0.938651 | 0.871678 | 1.509125 | H | -0.98904 | 0.850054 | -1.62045 |
| H | 0.812086 | 0.792914 | -1.53138 | H | -0.87814 | 0.718977 | 1.417997 |
| H | 2.092535 | -1.86159 | -1.60445 | H | -2.03288 | -2.00163 | 1.429457 |
| H | 5.462281 | -2.81191 | -2.58577 | H | -5.30331 | -3.62744 | 1.367818 |
| H | 3.892891 | -4.56053 | -3.28499 | H | -5.39399 | -3.79358 | 3.83746  |
| H | 3.138614 | -2.98477 | -3.57189 | H | -5.92209 | -2.1927  | 3.297467 |
| H | 2.654261 | -3.96934 | -2.17893 | H | -4.29839 | -2.40832 | 3.979212 |
| H | 5.404257 | -4.92051 | -1.27783 | H | -2.91286 | -4.36704 | 1.067044 |
| H | 5.859645 | -3.55464 | -0.24811 | H | -2.54502 | -3.77715 | 2.697267 |
| H | 4.211814 | -4.2095  | -0.1765  | H | -3.68847 | -5.10087 | 2.480067 |
| H | -0.54776 | 5.316053 | 0.655717 | H | 0.713222 | 3.775185 | -0.05534 |
| H | 0.265707 | 4.759133 | -0.81382 | H | 0.250621 | 5.350265 | -0.72064 |
| H | -0.92706 | 3.721559 | -0.01636 | H | -0.53849 | 4.741704 | 0.741404 |
| H | 1.11193  | 3.059454 | 3.084037 | H | -1.27213 | 3.020486 | -3.16932 |
| H | -0.49588 | 2.938208 | 2.352728 | H | 0.336399 | 2.982453 | -2.43036 |
| H | 0.124578 | 4.506212 | 2.883146 | H | -0.36508 | 4.517238 | -2.95602 |
| H | 4.36223  | 1.71477  | 2.222934 | H | -4.45954 | 1.512064 | -2.32997 |
| H | 2.690958 | 1.276129 | 2.574484 | H | -2.76801 | 1.155614 | -2.67729 |
| H | 3.212303 | 2.963319 | 2.658692 | H | -3.36913 | 2.816315 | -2.75696 |

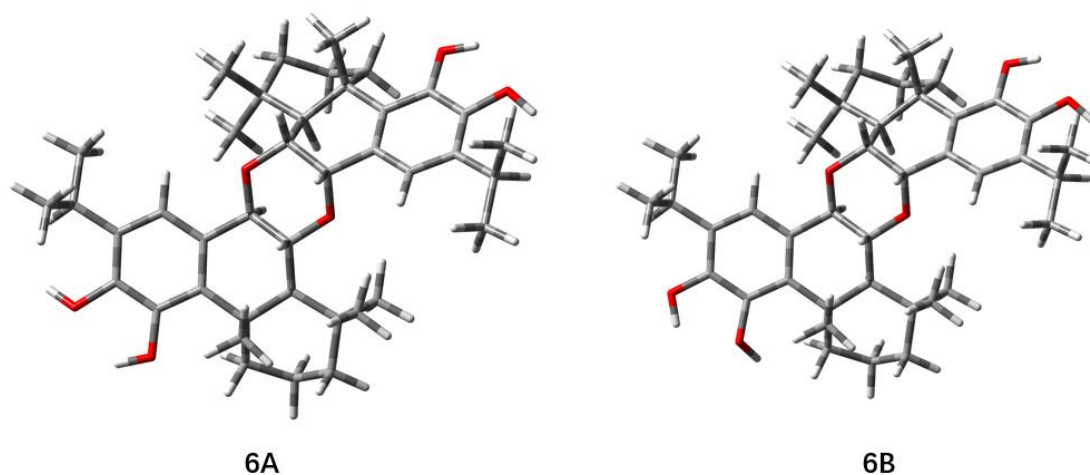

**Figure S68.** Possible conformers of **6** for ECD calculation.

**Table S4.** Important thermodynamic parameters and Boltzmann distributions of the optimized isomer **6** at m062x/6-311 G (d, p) level in the methanol.

| Conformations | Energy (a.u) | $\Delta G(\text{kcal/mol})$ | %    | Number of imaginary frequencies |
|---------------|--------------|-----------------------------|------|---------------------------------|
| <b>6A</b>     | -2008.227616 | 0                           | 57.2 | 0                               |

|           |              |      |      |   |
|-----------|--------------|------|------|---|
| <b>6B</b> | -2008.227344 | 0.17 | 42.8 | 0 |
|-----------|--------------|------|------|---|

**Table S5.** Optimized Z-matrixes of isomer **6** in the methanol (Å) at m062x/6-311 G (d, p) level.

| <b>6A</b> |           |           |           | <b>6B</b> |           |           |           |
|-----------|-----------|-----------|-----------|-----------|-----------|-----------|-----------|
| C         | 2.129613  | -3.589133 | 2.591788  | C         | 2.123656  | -3.585167 | 2.595625  |
| C         | 1.186119  | -4.380193 | 1.696427  | C         | 1.182866  | -4.378448 | 1.699356  |
| C         | 1.164796  | -2.129103 | 0.487587  | C         | 1.162592  | -2.12923  | 0.487574  |
| C         | 2.706797  | -2.385847 | 0.363826  | C         | 2.705018  | -2.384787 | 0.36723   |
| C         | 3.209216  | -2.8937   | 1.7544    | C         | 3.204717  | -2.890243 | 1.759653  |
| C         | 0.659705  | -1.355968 | -0.738672 | C         | 0.658971  | -1.35772  | -0.740147 |
| C         | 1.324056  | 0.016866  | -0.848011 | C         | 1.323006  | 0.015097  | -0.851135 |
| C         | 2.806816  | -0.002817 | -0.608183 | C         | 2.805283  | -0.003259 | -0.608792 |
| C         | 3.447282  | -1.099949 | -0.027832 | C         | 3.445238  | -1.098825 | -0.024813 |
| C         | 3.507962  | 1.149204  | -0.967177 | C         | 3.506344  | 1.148467  | -0.968715 |
| C         | 4.880786  | 1.262508  | -0.794069 | C         | 4.878672  | 1.263239  | -0.79259  |
| C         | 5.532152  | 0.151204  | -0.259461 | C         | 5.529664  | 0.153502  | -0.254333 |
| C         | 4.842614  | -1.006501 | 0.106208  | C         | 4.840164  | -1.004057 | 0.112059  |
| C         | 5.678293  | 2.484886  | -1.209293 | C         | 5.676049  | 2.485552  | -1.208231 |
| C         | 6.466839  | 2.193634  | -2.495626 | C         | 6.466623  | 2.193211  | -2.493089 |
| C         | 4.817613  | 3.735491  | -1.383161 | C         | 4.814818  | 3.735399  | -1.384954 |
| C         | 0.339635  | -3.427536 | 0.814898  | C         | 0.337606  | -3.428004 | 0.814226  |
| C         | -0.906253 | -3.065884 | 1.64401   | C         | -0.911374 | -3.066958 | 1.639141  |
| C         | -0.14436  | -4.177089 | -0.436034 | C         | -0.142036 | -4.179705 | -0.437086 |
| C         | 3.073828  | -3.410882 | -0.736707 | C         | 3.075237  | -3.410984 | -0.73112  |
| O         | 5.569303  | -2.054135 | 0.586181  | O         | 5.566576  | -2.050244 | 0.595497  |
| O         | 6.892965  | 0.077934  | -0.082701 | O         | 6.889921  | 0.081658  | -0.073779 |
| C         | -2.432058 | 4.019528  | 2.37092   | C         | -2.421016 | 4.019465  | 2.371083  |
| C         | -1.299452 | 4.597141  | 1.528891  | C         | -1.295333 | 4.596408  | 1.520775  |
| C         | -1.24295  | 2.173618  | 0.755945  | C         | -1.24419  | 2.171316  | 0.750928  |
| C         | -2.728077 | 2.430045  | 0.338701  | C         | -2.731079 | 2.42456   | 0.33561   |
| C         | -3.410836 | 3.208826  | 1.508521  | C         | -3.403527 | 3.221213  | 1.50143   |
| C         | -0.618112 | 1.142584  | -0.177463 | C         | -0.620609 | 1.138905  | -0.181981 |
| C         | -1.293139 | -0.191352 | 0.049911  | C         | -1.293809 | -0.194805 | 0.048967  |
| C         | -2.785442 | -0.115551 | -0.139179 | C         | -2.785957 | -0.119394 | -0.139091 |
| C         | -3.454816 | 1.100649  | 0.065826  | C         | -3.462409 | 1.092153  | 0.073367  |
| C         | -3.474581 | -1.277241 | -0.481983 | C         | -3.474584 | -1.277132 | -0.500443 |
| C         | -4.857824 | -1.297983 | -0.631221 | C         | -4.855233 | -1.306923 | -0.650678 |
| C         | -5.527689 | -0.096192 | -0.423379 | C         | -5.537787 | -0.11239  | -0.427845 |
| C         | -4.847694 | 1.079145  | -0.090624 | C         | -4.855245 | 1.05754   | -0.084003 |
| C         | -5.628638 | -2.53581  | -1.051834 | C         | -5.629347 | -2.541938 | -1.063281 |



|   |           |           |           |   |           |           |           |
|---|-----------|-----------|-----------|---|-----------|-----------|-----------|
| C | -6.088026 | -2.402977 | -2.512228 | C | -6.057807 | -2.428199 | -2.533705 |
| C | -4.842721 | -3.831944 | -0.857286 | C | -4.860716 | -3.841637 | -0.828593 |
| C | -0.394285 | 3.471087  | 0.971     | C | -0.394056 | 3.469163  | 0.960107  |
| C | 0.680975  | 3.185678  | 2.03622   | C | 0.6852    | 3.185079  | 2.021762  |
| C | 0.316958  | 3.953872  | -0.301435 | C | 0.311333  | 3.950068  | -0.316137 |
| C | -2.854743 | 3.243698  | -0.971676 | C | -2.864282 | 3.228909  | -0.979674 |
| O | 0.76306   | 0.940217  | 0.085602  | O | 0.760489  | 0.940139  | 0.080524  |
| O | -0.759786 | -1.18852  | -0.810852 | O | -0.760544 | -1.19046  | -0.813251 |
| O | -5.580991 | 2.218124  | 0.05589   | O | -5.682262 | 2.161098  | 0.003118  |
| O | -6.886381 | 0.057573  | -0.568306 | O | -6.891095 | -0.082064 | -0.561731 |
| H | 2.609079  | -4.241263 | 3.32559   | H | 2.601926  | -4.235767 | 3.331554  |
| H | 1.553987  | -2.853758 | 3.163006  | H | 1.546115  | -2.849366 | 3.164372  |
| H | 0.506913  | -4.996423 | 2.29243   | H | 0.502901  | -4.994355 | 2.294792  |
| H | 1.766187  | -5.076121 | 1.084385  | H | 1.764962  | -5.074818 | 1.089746  |
| H | 1.059127  | -1.459465 | 1.351781  | H | 1.054872  | -1.459051 | 1.351067  |
| H | 4.033837  | -3.587439 | 1.588401  | H | 4.030164  | -3.583678 | 1.596522  |
| H | 3.622719  | -2.054051 | 2.31883   | H | 3.616375  | -2.049479 | 2.323766  |
| H | 0.90029   | -1.919815 | -1.64334  | H | 0.900179  | -1.922629 | -1.643958 |
| H | 1.126587  | 0.407505  | -1.856756 | H | 1.126448  | 0.404233  | -1.860586 |
| H | 2.948714  | 1.971697  | -1.397993 | H | 2.947601  | 1.969649  | -1.402663 |
| H | 6.397771  | 2.708682  | -0.409981 | H | 6.394125  | 2.710777  | -0.408058 |
| H | 5.771384  | 1.996692  | -3.315606 | H | 5.772447  | 1.995061  | -3.313856 |
| H | 7.086321  | 3.051109  | -2.767536 | H | 7.086146  | 3.05064   | -2.765028 |
| H | 7.114273  | 1.321922  | -2.382949 | H | 7.114294  | 1.321875  | -2.378699 |
| H | 4.213657  | 3.934402  | -0.49507  | H | 5.454978  | 4.600247  | -1.567863 |
| H | 4.146704  | 3.633749  | -2.240089 | H | 4.209324  | 3.934938  | -0.498048 |
| H | 5.458045  | 4.600137  | -1.566078 | H | 4.145377  | 3.63224   | -2.242856 |
| H | -1.423202 | -3.983747 | 1.938343  | H | -1.426679 | -3.985287 | 1.934776  |
| H | -0.638835 | -2.524428 | 2.556591  | H | -0.647784 | -2.522194 | 2.550873  |
| H | -1.613078 | -2.463254 | 1.078664  | H | -1.618513 | -2.468028 | 1.070089  |
| H | 0.671831  | -4.448151 | -1.106773 | H | -0.862818 | -3.58402  | -1.001065 |
| H | -0.639448 | -5.102676 | -0.125974 | H | 0.676235  | -4.451051 | -1.10513  |
| H | -0.866121 | -3.579861 | -0.997121 | H | -0.637285 | -5.105227 | -0.127139 |
| H | 4.161319  | -3.466693 | -0.8106   | H | 2.712887  | -4.412003 | -0.508592 |
| H | 2.710631  | -4.411799 | -0.515076 | H | 2.690781  | -3.114523 | -1.709757 |
| H | 2.688043  | -3.112507 | -1.714228 | H | 4.162916  | -3.465598 | -0.80302  |
| H | 6.49027   | -1.766615 | 0.640563  | H | 6.487326  | -1.762257 | 0.650958  |
| H | 7.274378  | 0.958069  | -0.004112 | H | 7.271617  | 0.96234   | -0.003356 |
| H | -2.979317 | 4.816259  | 2.880172  | H | -2.966203 | 4.812279  | 2.887281  |
| H | -2.007451 | 3.388705  | 3.15839   | H | -1.998437 | 3.377455  | 3.149385  |
| H | -1.719204 | 5.202724  | 0.720717  | H | -1.721937 | 5.20016   | 0.714619  |
| H | -0.680283 | 5.27421   | 2.125405  | H | -0.674183 | 5.274944  | 2.112806  |
| H | -1.301975 | 1.689997  | 1.741447  | H | -1.300158 | 1.689295  | 1.737162  |

|   |           |           |           |   |           |           |           |
|---|-----------|-----------|-----------|---|-----------|-----------|-----------|
| H | -4.157688 | 3.880425  | 1.083663  | H | -4.109197 | 3.939879  | 1.07071   |
| H | -3.956183 | 2.505419  | 2.143168  | H | -3.961463 | 2.534777  | 2.148077  |
| H | -0.732176 | 1.441868  | -1.229661 | H | -0.73658  | 1.435782  | -1.234582 |
| H | -1.070813 | -0.462845 | 1.091579  | H | -1.067954 | -0.465914 | 1.08996   |
| H | -2.902025 | -2.178364 | -0.653187 | H | -2.897674 | -2.174677 | -0.679583 |
| H | -6.52264  | -2.61204  | -0.417978 | H | -6.538869 | -2.565244 | -0.45409  |
| H | -5.215021 | -2.352817 | -3.168181 | H | -6.660568 | -3.291905 | -2.825271 |
| H | -6.689743 | -3.266282 | -2.805008 | H | -6.644946 | -1.523854 | -2.699973 |
| H | -6.681465 | -1.499847 | -2.666693 | H | -5.174894 | -2.393486 | -3.178273 |
| H | -3.992334 | -3.881083 | -1.54249  | H | -3.998517 | -3.917956 | -1.497071 |
| H | -5.48678  | -4.68768  | -1.067577 | H | -5.509583 | -4.696297 | -1.030236 |
| H | -4.466704 | -3.925244 | 0.163955  | H | -4.501861 | -3.917694 | 0.200701  |
| H | 0.22147   | 2.953016  | 3.001713  | H | 0.229992  | 2.952767  | 2.989362  |
| H | 1.31307   | 2.348553  | 1.744639  | H | 1.317107  | 2.348623  | 1.728525  |
| H | 1.30924   | 4.071492  | 2.169308  | H | 1.312631  | 4.071856  | 2.15142   |
| H | 0.817379  | 4.90461   | -0.092765 | H | 0.811835  | 4.901436  | -0.111142 |
| H | 1.075286  | 3.234929  | -0.617345 | H | 1.068838  | 3.231035  | -0.633407 |
| H | -0.371442 | 4.116535  | -1.131511 | H | -0.38003  | 4.110807  | -1.144124 |
| H | -3.908337 | 3.30671   | -1.247028 | H | -3.919187 | 3.292917  | -1.252031 |
| H | -2.485314 | 4.26115   | -0.861055 | H | -2.490677 | 4.245882  | -0.878781 |
| H | -2.319094 | 2.770263  | -1.79725  | H | -2.336385 | 2.746101  | -1.804053 |
| H | -6.510636 | 1.980109  | -0.057826 | H | -5.47225  | 2.6828    | 0.783111  |
| H | -7.338692 | -0.782279 | -0.439674 | H | -7.176427 | 0.817907  | -0.353091 |

**Table S6.** Key transitions, oscillator strengths, and rotatory strengths in the ECD spectra of conformers **6A** at the `pbe1pbe/aug-ccpvdz` level in MeOH with PCM.

| <i>Num</i> | <i>Excited states</i> | <i>CI Coefficient</i> | $\Delta E$ (eV) | $\lambda$ (nm) | <i>f</i> | <i>R(vel)</i> | <i>R(len)</i> |
|------------|-----------------------|-----------------------|-----------------|----------------|----------|---------------|---------------|
| 1          | 169 -> 176            | 0.11986               | 4.9614          | 249.90         | 0.0413   | -0.1303       | 0.0005        |
|            | 170 -> 176            | 0.31883               |                 |                |          |               |               |
|            | 171 -> 173            | 0.19523               |                 |                |          |               |               |
|            | 172 -> 173            | 0.47508               |                 |                |          |               |               |
|            | 172 -> 174            | 0.27880               |                 |                |          |               |               |
|            | 172 -> 175            | 0.11840               |                 |                |          |               |               |
| 2          | 169 -> 173            | -0.13033              | 4.9774          | 249.10         | 0.0322   | 1.0073        | 1.1243        |
|            | 169 -> 175            | 0.31592               |                 |                |          |               |               |
|            | 170 -> 175            | -0.11310              |                 |                |          |               |               |
|            | 171 -> 173            | -0.23626              |                 |                |          |               |               |
|            | 171 -> 174            | 0.47365               |                 |                |          |               |               |
|            | 171 -> 175            | -0.14739              |                 |                |          |               |               |
|            | 172 -> 173            | 0.12856               |                 |                |          |               |               |
| 172 -> 174 | -0.18794              |                       |                 |                |          |               |               |
| 3          | 169 -> 173            | 0.12903               | 5.4591          | 227.12         | 0.0365   | -6.1716       | -7.6939       |
|            | 169 -> 174            | -0.23990              |                 |                |          |               |               |

|    |            |          |        |        |        |          |          |
|----|------------|----------|--------|--------|--------|----------|----------|
|    | 171 -> 173 | -0.27508 |        |        |        |          |          |
|    | 171 -> 175 | 0.49892  |        |        |        |          |          |
|    | 172 -> 173 | 0.10651  |        |        |        |          |          |
|    | 172 -> 175 | -0.24689 |        |        |        |          |          |
| 4  | 170 -> 173 | -0.39420 | 5.5100 | 225.02 | 0.0141 | 5.0601   | 5.3078   |
|    | 170 -> 174 | -0.20478 |        |        |        |          |          |
|    | 171 -> 176 | 0.15935  |        |        |        |          |          |
|    | 172 -> 176 | 0.48540  |        |        |        |          |          |
| 5  | 168 -> 173 | -0.14097 | 5.6260 | 220.38 | 0.0063 | 8.7160   | 8.7747   |
|    | 168 -> 174 | 0.12038  |        |        |        |          |          |
|    | 170 -> 173 | -0.11677 |        |        |        |          |          |
|    | 170 -> 174 | 0.13463  |        |        |        |          |          |
|    | 171 -> 174 | 0.21590  |        |        |        |          |          |
|    | 172 -> 173 | -0.33967 |        |        |        |          |          |
|    | 172 -> 174 | 0.45561  |        |        |        |          |          |
|    | 172 -> 175 | 0.17834  |        |        |        |          |          |
| 6  | 171 -> 173 | 0.49878  | 5.6884 | 217.96 | 0.0032 | -0.5138  | -1.7957  |
|    | 171 -> 174 | 0.29579  |        |        |        |          |          |
|    | 171 -> 175 | 0.20054  |        |        |        |          |          |
|    | 172 -> 173 | -0.16703 |        |        |        |          |          |
|    | 172 -> 174 | -0.16779 |        |        |        |          |          |
|    | 172 -> 175 | -0.11526 |        |        |        |          |          |
| 7  | 170 -> 173 | -0.10469 | 5.7479 | 215.70 | 0.0135 | -8.6540  | -11.3495 |
|    | 171 -> 175 | 0.15968  |        |        |        |          |          |
|    | 171 -> 178 | -0.16476 |        |        |        |          |          |
|    | 172 -> 174 | -0.23615 |        |        |        |          |          |
|    | 172 -> 175 | 0.40664  |        |        |        |          |          |
|    | 172 -> 177 | -0.15103 |        |        |        |          |          |
|    | 172 -> 178 | -0.36981 |        |        |        |          |          |
| 8  | 171 -> 177 | 0.58068  | 5.7632 | 215.13 | 0.0026 | -5.4310  | -11.5393 |
|    | 171 -> 178 | -0.17852 |        |        |        |          |          |
|    | 172 -> 177 | -0.18725 |        |        |        |          |          |
|    | 172 -> 178 | 0.18187  |        |        |        |          |          |
| 9  | 170 -> 175 | 0.10799  | 5.7667 | 215.00 | 0.0310 | -27.8327 | -29.7901 |
|    | 171 -> 175 | 0.16493  |        |        |        |          |          |
|    | 171 -> 178 | 0.20274  |        |        |        |          |          |
|    | 172 -> 174 | -0.17405 |        |        |        |          |          |
|    | 172 -> 175 | 0.36446  |        |        |        |          |          |
|    | 172 -> 177 | 0.19753  |        |        |        |          |          |
|    | 172 -> 178 | 0.42279  |        |        |        |          |          |
| 10 | 168 -> 173 | -0.26737 | 5.8211 | 212.99 | 0.0348 | 36.8778  | 38.2690  |
|    | 168 -> 174 | 0.22527  |        |        |        |          |          |
|    | 168 -> 175 | 0.14293  |        |        |        |          |          |

|    |            |          |        |        |        |           |           |
|----|------------|----------|--------|--------|--------|-----------|-----------|
|    | 170 -> 173 | -0.29920 |        |        |        |           |           |
|    | 170 -> 174 | 0.32799  |        |        |        |           |           |
|    | 170 -> 175 | 0.11374  |        |        |        |           |           |
|    | 171 -> 174 | -0.11373 |        |        |        |           |           |
|    | 171 -> 175 | -0.16569 |        |        |        |           |           |
|    | 172 -> 173 | 0.15291  |        |        |        |           |           |
|    | 172 -> 174 | -0.11969 |        |        |        |           |           |
|    | 172 -> 175 | -0.16689 |        |        |        |           |           |
| 11 | 168 -> 173 | 0.28001  | 5.8815 | 210.80 | 0.0582 | -76.5344  | -72.0277  |
|    | 168 -> 174 | 0.24766  |        |        |        |           |           |
|    | 169 -> 173 | -0.16238 |        |        |        |           |           |
|    | 169 -> 174 | -0.14645 |        |        |        |           |           |
|    | 170 -> 173 | 0.19085  |        |        |        |           |           |
|    | 170 -> 174 | 0.26973  |        |        |        |           |           |
|    | 170 -> 176 | -0.20719 |        |        |        |           |           |
|    | 171 -> 173 | 0.17771  |        |        |        |           |           |
|    | 171 -> 176 | 0.23137  |        |        |        |           |           |
|    | 172 -> 176 | 0.17408  |        |        |        |           |           |
| 12 | 168 -> 176 | -0.17181 | 5.9026 | 210.05 | 0.0869 | -20.8966  | -20.2393  |
|    | 170 -> 173 | -0.15507 |        |        |        |           |           |
|    | 170 -> 174 | -0.15008 |        |        |        |           |           |
|    | 170 -> 176 | -0.13364 |        |        |        |           |           |
|    | 171 -> 176 | 0.51070  |        |        |        |           |           |
|    | 172 -> 176 | -0.34476 |        |        |        |           |           |
| 13 | 168 -> 174 | -0.12241 | 5.9849 | 207.16 | 0.3022 | 11.0801   | 11.9403   |
|    | 168 -> 175 | 0.28311  |        |        |        |           |           |
|    | 169 -> 173 | 0.10020  |        |        |        |           |           |
|    | 169 -> 175 | -0.15906 |        |        |        |           |           |
|    | 170 -> 173 | 0.11333  |        |        |        |           |           |
|    | 170 -> 174 | -0.14680 |        |        |        |           |           |
|    | 170 -> 175 | 0.49115  |        |        |        |           |           |
|    | 171 -> 174 | 0.15509  |        |        |        |           |           |
|    | 171 -> 176 | 0.14504  |        |        |        |           |           |
|    | 172 -> 175 | -0.14092 |        |        |        |           |           |
| 14 | 168 -> 176 | 0.24279  | 6.0179 | 206.02 | 0.2764 | -71.1011  | -70.5892  |
|    | 169 -> 173 | 0.11082  |        |        |        |           |           |
|    | 170 -> 173 | 0.20004  |        |        |        |           |           |
|    | 170 -> 174 | 0.16705  |        |        |        |           |           |
|    | 170 -> 175 | -0.11789 |        |        |        |           |           |
|    | 170 -> 176 | 0.40324  |        |        |        |           |           |
|    | 171 -> 176 | 0.34214  |        |        |        |           |           |
|    | 172 -> 173 | -0.11585 |        |        |        |           |           |
| 15 | 168 -> 173 | 0.18147  | 6.0954 | 203.41 | 0.1846 | -244.5149 | -241.3950 |

|    |            |          |        |        |        |           |           |
|----|------------|----------|--------|--------|--------|-----------|-----------|
|    | 168 -> 175 | -0.10300 |        |        |        |           |           |
|    | 169 -> 173 | -0.31222 |        |        |        |           |           |
|    | 169 -> 174 | 0.37632  |        |        |        |           |           |
|    | 170 -> 173 | -0.21634 |        |        |        |           |           |
|    | 170 -> 174 | 0.23598  |        |        |        |           |           |
|    | 170 -> 175 | 0.19488  |        |        |        |           |           |
|    | 170 -> 176 | 0.12451  |        |        |        |           |           |
|    | 171 -> 175 | 0.13233  |        |        |        |           |           |
| 16 | 168 -> 174 | -0.17222 | 6.1401 | 201.92 | 0.2533 | -264.1220 | -261.7917 |
|    | 168 -> 175 | -0.12939 |        |        |        |           |           |
|    | 168 -> 176 | -0.12848 |        |        |        |           |           |
|    | 169 -> 173 | 0.43789  |        |        |        |           |           |
|    | 169 -> 174 | 0.22878  |        |        |        |           |           |
|    | 169 -> 175 | -0.15426 |        |        |        |           |           |
|    | 170 -> 174 | 0.21800  |        |        |        |           |           |
|    | 170 -> 176 | -0.17971 |        |        |        |           |           |
|    | 171 -> 174 | 0.14715  |        |        |        |           |           |
|    | 172 -> 176 | 0.15608  |        |        |        |           |           |
| 17 | 168 -> 173 | -0.28922 | 6.1667 | 201.05 | 0.7461 | 406.2533  | 407.6805  |
|    | 168 -> 174 | 0.36254  |        |        |        |           |           |
|    | 169 -> 174 | 0.31220  |        |        |        |           |           |
|    | 169 -> 175 | -0.16828 |        |        |        |           |           |
|    | 170 -> 173 | 0.16677  |        |        |        |           |           |
|    | 170 -> 174 | -0.15902 |        |        |        |           |           |
|    | 171 -> 175 | 0.20091  |        |        |        |           |           |
| 18 | 168 -> 173 | -0.18956 | 6.1842 | 200.49 | 0.6234 | 290.6693  | 292.0323  |
|    | 168 -> 174 | -0.22102 |        |        |        |           |           |
|    | 169 -> 174 | 0.17764  |        |        |        |           |           |
|    | 169 -> 175 | 0.42853  |        |        |        |           |           |
|    | 170 -> 175 | 0.17541  |        |        |        |           |           |
|    | 170 -> 176 | -0.18220 |        |        |        |           |           |
|    | 171 -> 174 | -0.16237 |        |        |        |           |           |
|    | 171 -> 175 | 0.10252  |        |        |        |           |           |
|    | 172 -> 174 | 0.12300  |        |        |        |           |           |
|    | 172 -> 176 | 0.16252  |        |        |        |           |           |
| 19 | 168 -> 173 | 0.32970  | 6.2291 | 199.04 | 0.0808 | -12.7105  | -12.1106  |
|    | 168 -> 174 | 0.32171  |        |        |        |           |           |
|    | 169 -> 173 | 0.30285  |        |        |        |           |           |
|    | 169 -> 174 | 0.15258  |        |        |        |           |           |
|    | 169 -> 175 | 0.28180  |        |        |        |           |           |
|    | 169 -> 176 | -0.10767 |        |        |        |           |           |
|    | 170 -> 173 | -0.11424 |        |        |        |           |           |
|    | 170 -> 174 | -0.16668 |        |        |        |           |           |

|    |            |          |        |        |        |          |          |
|----|------------|----------|--------|--------|--------|----------|----------|
|    | 170 -> 175 | 0.11226  |        |        |        |          |          |
| 20 | 168 -> 175 | 0.34005  | 6.2711 | 197.71 | 0.0582 | -22.0180 | -22.1873 |
|    | 168 -> 178 | -0.10010 |        |        |        |          |          |
|    | 169 -> 174 | 0.12615  |        |        |        |          |          |
|    | 169 -> 178 | 0.16234  |        |        |        |          |          |
|    | 170 -> 175 | -0.17149 |        |        |        |          |          |
|    | 170 -> 177 | 0.18527  |        |        |        |          |          |
|    | 170 -> 178 | 0.45971  |        |        |        |          |          |

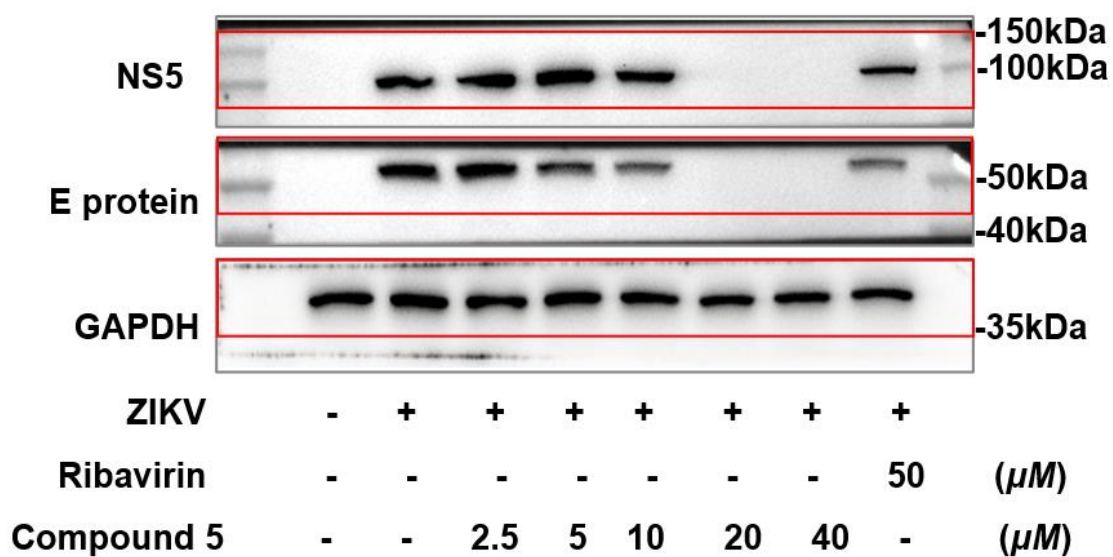

Figure S69. The full raw data of western blots (E and F) of compound 5
